# Supplementary material for: Bioinformatic Analysis Reveals High Diversity of Bacterial Genes for Laccase-Like Enzymes
Source: PLoS One. 2011 Oct 12;6(10):e25724. doi: 10.1371/journal.pone.0025724 (PMC3192119; doi:10.1371/journal.pone.0025724)
Supplement: Figure S3 — Profile Hidden Markov Model for three-domain laccases. The pHMM file “small3D.hmm“ was generated with HMMER software (28). (HMM) [file pone.0025724.s003.hmm]

HMMER3/b [3.0 | March 2010]
NAME  small_aln_forHMM
LENG  378
ALPH  amino
RF    no
CS    no
MAP   yes
DATE  Wed Dec 22 16:18:42 2010
NSEQ  324
EFFN  4.770813
CKSUM 2002070395
STATS LOCAL MSV      -11.3976  0.69960
STATS LOCAL VITERBI  -12.7586  0.69960
STATS LOCAL FORWARD   -4.8346  0.69960
HMM          A        C        D        E        F        G        H        I        K        L        M        N        P        Q        R        S        T        V        W        Y   
            m->m     m->i     m->d     i->m     i->i     d->m     d->d
  COMPO   2.56082  4.57846  2.83970  2.65913  3.44347  2.77623  3.06397  3.05260  2.77713  2.55817  3.62767  3.03590  3.07595  3.03614  2.86200  2.75594  2.79403  2.70481  4.39974  3.63471
          2.68618  4.42225  2.77519  2.73123  3.46354  2.40513  3.72494  3.29354  2.67741  2.69355  4.24690  2.90346  2.73739  3.18146  2.89801  2.37887  2.77519  2.98518  4.58477  3.61503
          0.00739  5.30656  6.02891  0.61958  0.77255  0.00000        *
      1   2.83291  4.92688  3.70275  3.14124  4.09791  3.88716  4.19413  3.33877  3.11494  2.96727  3.95606  2.25773  4.34281  3.30012  3.52237  2.20858  1.41420  2.24632  5.49047  4.10439      1 - -
          2.68618  4.42225  2.77519  2.73123  3.46354  2.40513  3.72494  3.29354  2.67741  2.69355  4.24690  2.90346  2.73739  3.18146  2.89801  2.37887  2.77519  2.98518  4.58477  3.61503
          0.00739  5.30656  6.02891  0.61958  0.77255  0.48576  0.95510
      2   3.12606  4.53799  5.13928  4.52778  3.11263  4.35704  4.69517  1.75850  4.31774  1.61658  3.05439  4.51912  4.70983  4.44343  4.32665  3.67166  2.20845  1.49831  4.90748  3.91852      2 - -
          2.68618  4.42225  2.77519  2.73123  3.46354  2.40513  3.72494  3.29354  2.67741  2.69355  4.24690  2.90346  2.73739  3.18146  2.89801  2.37887  2.77519  2.98518  4.58477  3.61503
          0.00739  5.30656  6.02891  0.61958  0.77255  0.48576  0.95510
      3   5.55978  6.76525  5.57699  5.57045  5.36377  5.34643  0.05883  6.56577  5.50074  5.76913  7.02762  5.87663  5.98828  6.00550  5.58105  5.69915  5.96072  6.24829  6.66031  5.31830      3 - -
          2.68618  4.42225  2.77519  2.73123  3.46354  2.40513  3.72494  3.29354  2.67741  2.69355  4.24690  2.90346  2.73739  3.18146  2.89801  2.37887  2.77519  2.98518  4.58477  3.61503
          0.00739  5.30656  6.02891  0.61958  0.77255  0.48576  0.95510
      4   3.06505  4.50959  4.96654  4.36527  2.62569  4.08721  3.94283  2.94339  4.17189  1.83681  3.62554  4.38959  4.63591  4.31746  4.21533  3.58058  2.94375  2.48521  1.16089  3.41785      4 - -
          2.68618  4.42225  2.77519  2.73123  3.46354  2.40513  3.72494  3.29354  2.67741  2.69355  4.24690  2.90346  2.73739  3.18146  2.89801  2.37887  2.77519  2.98518  4.58477  3.61503
          0.00739  5.30656  6.02891  0.61958  0.77255  0.48576  0.95510
      5   5.55978  6.76525  5.57699  5.57045  5.36377  5.34643  0.05883  6.56577  5.50074  5.76913  7.02762  5.87663  5.98828  6.00550  5.58105  5.69915  5.96072  6.24829  6.66031  5.31830      5 - -
          2.68618  4.42225  2.77519  2.73123  3.46354  2.40513  3.72494  3.29354  2.67741  2.69355  4.24690  2.90346  2.73739  3.18146  2.89801  2.37887  2.77519  2.98518  4.58477  3.61503
          0.00739  5.30656  6.02891  0.61958  0.77255  0.48576  0.95510
      6   3.39637  5.36039  4.16671  4.22306  5.91922  0.23383  5.60441  5.59071  4.79666  5.21256  6.01636  3.52104  4.82643  4.93053  5.07370  3.45387  3.95987  4.72039  7.20039  5.99331      6 - -
          2.68618  4.42225  2.77519  2.73123  3.46354  2.40513  3.72494  3.29354  2.67741  2.69355  4.24690  2.90346  2.73739  3.18146  2.89801  2.37887  2.77519  2.98518  4.58477  3.61503
          0.00739  5.30656  6.02891  0.61958  0.77255  0.48576  0.95510
      7   2.81243  4.45425  4.98146  4.36978  3.09529  2.60155  4.56543  2.08117  4.16641  1.25773  2.68210  4.37943  4.59889  3.51643  4.19348  3.24905  3.20104  2.39618  4.68830  3.25023      7 - -
          2.68618  4.42225  2.77519  2.73123  3.46354  2.40513  3.72494  3.29354  2.67741  2.69355  4.24690  2.90346  2.73739  3.18146  2.89801  2.37887  2.77519  2.98518  4.58477  3.61503
          0.00739  5.30656  6.02891  0.61958  0.77255  0.48576  0.95510
      8   2.52155  5.09445  2.86419  2.05727  4.19656  3.74459  2.24678  3.48161  2.64541  3.33365  4.54238  2.88019  2.78964  2.90028  2.28769  2.89258  2.86166  3.36119  5.93817  4.40527      8 - -
          2.68618  4.42225  2.77519  2.73123  3.46354  2.40513  3.72494  3.29354  2.67741  2.69355  4.24690  2.90346  2.73739  3.18146  2.89801  2.37887  2.77519  2.98518  4.58477  3.61503
          0.00739  5.30656  6.02891  0.61958  0.77255  0.48576  0.95510
      9   3.04718  4.47398  4.89714  4.18980  3.41513  4.23122  4.55795  1.95705  4.10767  1.76595  3.50040  4.34506  3.69412  3.33624  4.16702  3.17572  2.68787  1.28391  5.09658  3.91700      9 - -
          2.68618  4.42225  2.77519  2.73123  3.46354  2.40513  3.72494  3.29354  2.67741  2.69355  4.24690  2.90346  2.73739  3.18146  2.89801  2.37887  2.77519  2.98518  4.58477  3.61503
          0.00739  5.30656  6.02891  0.61958  0.77255  0.48576  0.95510
     10   2.35276  5.51320  2.67329  2.54671  4.84764  3.67858  3.82127  4.32628  2.65815  3.72652  4.55811  3.22827  1.37459  3.09276  2.63786  2.36580  3.14259  3.86586  5.95279  4.54774     10 - -
          2.68618  4.42225  2.77519  2.73123  3.46354  2.40513  3.72494  3.29354  2.67741  2.69355  4.24690  2.90346  2.73739  3.18146  2.89801  2.37887  2.77519  2.98518  4.58477  3.61503
          0.00739  5.30656  6.02891  0.61958  0.77255  0.48576  0.95510
     11   2.42467  4.83875  3.36746  2.89177  4.42037  2.43942  4.07288  3.56881  2.88354  3.24348  4.18999  1.86038  1.96814  3.23119  3.34285  2.42949  3.25754  3.51812  4.16687  4.06547     11 - -
          2.68618  4.42225  2.77519  2.73123  3.46354  2.40513  3.72494  3.29354  2.67741  2.69355  4.24690  2.90346  2.73739  3.18146  2.89801  2.37887  2.77519  2.98518  4.58477  3.61503
          0.03058  5.30656  3.68265  0.61958  0.77255  0.48576  0.95510
     12   2.21566  5.51041  2.05847  1.96308  4.85416  3.40187  3.71423  3.93661  2.43361  3.52698  3.53435  2.89920  3.25072  2.90247  2.70576  2.68549  2.81726  3.51206  5.94388  4.45840     12 - -
          2.68618  4.42225  2.77519  2.73123  3.46354  2.40513  3.72494  3.29354  2.67741  2.69355  4.24690  2.90346  2.73739  3.18146  2.89801  2.37887  2.77519  2.98518  4.58477  3.61503
          0.00757  5.28355  6.00589  0.61958  0.77255  0.56933  0.83449
     13   2.38455  4.01557  3.13758  2.56979  3.16675  3.04205  4.02984  3.34897  3.03559  3.01890  2.01688  3.40020  3.93537  2.58377  3.45843  2.35828  3.25451  2.69025  5.52031  3.43493     13 - -
          2.68616  4.42229  2.77509  2.73123  3.46358  2.40511  3.72499  3.29358  2.67745  2.69359  4.24665  2.90346  2.73744  3.18151  2.89805  2.37891  2.77510  2.98509  4.58481  3.61507
          0.17651  3.04365  2.17022  0.62201  0.76974  0.56933  0.83449
     14   3.73773  6.43217  0.34380  2.88281  5.94111  3.48366  4.71241  5.52967  3.92076  5.00048  5.92050  3.47302  4.68471  3.58331  4.62695  3.71921  4.03418  4.64974  7.15391  5.54859     18 - -
          2.68618  4.42225  2.77519  2.73123  3.46354  2.40513  3.72494  3.29354  2.67741  2.69355  4.24690  2.90346  2.73739  3.18146  2.89801  2.37887  2.77519  2.98518  4.58477  3.61503
          0.00852  5.16512  5.88746  0.61958  0.77255  0.87508  0.53927
     15   3.30104  5.34563  3.14391  3.21277  4.75485  0.51779  4.54883  4.29156  3.48166  3.65723  4.53047  3.68074  4.32627  3.67428  3.89475  3.37953  3.64985  3.93028  6.11480  4.34771     19 - -
          2.68618  4.42225  2.77519  2.73123  3.46354  2.40513  3.72494  3.29354  2.67741  2.69355  4.24690  2.90346  2.73739  3.18146  2.89801  2.37887  2.77519  2.98518  4.58477  3.61503
          0.00849  5.16879  5.89114  0.61958  0.77255  0.29800  1.35595
     16   2.71845  4.83819  3.81156  3.11824  3.51015  2.09590  3.26662  2.91827  3.16561  3.00746  3.86519  2.39766  3.72486  3.41945  3.44560  2.98261  3.08626  1.71337  5.07917  3.22654     20 - -
          2.68618  4.42225  2.77519  2.73123  3.46354  2.40513  3.72494  3.29354  2.67741  2.69355  4.24690  2.90346  2.73739  3.18146  2.89801  2.37887  2.77519  2.98518  4.58477  3.61503
          0.01029  5.30656  5.24508  0.61958  0.77255  0.48576  0.95510
     17   2.19074  4.23727  3.45521  2.73604  4.44402  3.68577  4.00081  3.85654  2.89002  3.46850  4.28661  3.34341  1.19070  2.93671  3.12014  2.76957  3.20810  3.09492  5.72092  4.39340     21 - -
          2.68618  4.42225  2.77519  2.73123  3.46354  2.40513  3.72494  3.29354  2.67741  2.69355  4.24690  2.90346  2.73739  3.18146  2.89801  2.37887  2.77519  2.98518  4.58477  3.61503
          0.00742  5.30369  6.02604  0.61958  0.77255  0.47900  0.96602
     18   3.01445  4.67605  2.11338  2.13565  3.79426  2.41880  2.65847  4.32956  2.71562  3.71028  4.16978  3.11088  3.15719  2.36311  2.99774  2.77475  2.93795  3.79059  5.50515  3.55268     22 - -
          2.68618  4.42225  2.77519  2.73123  3.46354  2.40513  3.72494  3.29354  2.67741  2.69355  4.24690  2.90346  2.73739  3.18146  2.89801  2.37887  2.77519  2.98518  4.58477  3.61503
          0.00739  5.30656  6.02891  0.61958  0.77255  0.48576  0.95510
     19   1.99569  5.40539  2.26901  2.53655  4.70254  3.13190  4.00480  3.72122  2.73710  2.72892  3.66692  2.47333  3.88876  2.60174  3.20191  2.84801  3.14204  2.39185  5.86789  4.48784     23 - -
          2.68618  4.42225  2.77519  2.73123  3.46354  2.40513  3.72494  3.29354  2.67741  2.69355  4.24690  2.90346  2.73739  3.18146  2.89801  2.37887  2.77519  2.98518  4.58477  3.61503
          0.01041  5.30656  5.22222  0.61958  0.77255  0.48576  0.95510
     20   2.96927  4.59015  4.16647  3.42201  3.53961  3.76432  4.32255  2.73414  3.66694  2.32201  3.34660  3.85641  2.47347  3.83543  3.65195  2.75447  1.70218  2.04709  2.90649  3.99423     24 - -
          2.68618  4.42225  2.77519  2.73123  3.46354  2.40513  3.72494  3.29354  2.67741  2.69355  4.24690  2.90346  2.73739  3.18146  2.89801  2.37887  2.77519  2.98518  4.58477  3.61503
          0.00742  5.30357  6.02591  0.61958  0.77255  0.47871  0.96648
     21   2.88748  4.48830  4.77046  4.07320  2.61206  3.93329  4.02231  1.86521  4.01020  2.22192  3.36890  4.16238  3.92805  1.82324  3.73371  3.50500  2.88725  2.24078  3.44759  3.31822     25 - -
          2.68618  4.42225  2.77519  2.73123  3.46354  2.40513  3.72494  3.29354  2.67741  2.69355  4.24690  2.90346  2.73739  3.18146  2.89801  2.37887  2.77519  2.98518  4.58477  3.61503
          0.01763  5.30656  4.38047  0.61958  0.77255  0.48576  0.95510
     22   2.13454  5.49137  2.41741  2.44424  4.38327  3.31043  3.73108  3.99592  2.54216  2.67854  4.13005  2.74498  2.53063  2.79223  3.01092  2.74891  2.53637  3.60053  5.93137  3.94528     26 - -
          2.68618  4.42225  2.77519  2.73123  3.46354  2.40513  3.72494  3.29354  2.67741  2.69355  4.24690  2.90346  2.73739  3.18146  2.89801  2.37887  2.77519  2.98518  4.58477  3.61503
          0.03163  5.29640  3.64468  0.61958  0.77255  0.46271  0.99311
     23   2.05005  5.36527  3.07996  2.60121  4.65214  3.58903  3.84467  3.72528  2.67277  3.16922  4.14717  3.10092  1.60936  2.84568  2.90184  2.92607  2.90146  3.14585  5.83445  3.71597     27 - -
          2.68602  4.42300  2.77472  2.73167  3.46307  2.40454  3.72363  3.29365  2.67730  2.69359  4.24455  2.90428  2.73738  3.18122  2.89857  2.37954  2.77585  2.98543  4.58490  3.61332
          0.76032  1.19988  1.46425  1.85824  0.16954  0.43548  1.04116
     24   2.75069  4.65767  3.68371  3.20049  3.79734  2.49555  3.67454  1.94449  3.10031  2.60064  3.75992  3.24087  2.99300  3.20365  3.23176  3.05000  3.06281  1.84656  5.23708  3.99932     57 - -
          2.68618  4.42225  2.77519  2.73123  3.46354  2.40513  3.72494  3.29354  2.67741  2.69355  4.24690  2.90346  2.73739  3.18146  2.89801  2.37887  2.77519  2.98518  4.58477  3.61503
          0.15083  5.05371  2.01275  0.61958  0.77255  1.10418  0.40269
     25   2.28843  5.22871  3.00240  2.31707  4.35131  2.95697  3.82944  3.67581  2.38542  3.09244  3.62850  3.07667  2.04975  2.74080  2.81499  2.73287  3.01141  3.45601  5.69144  3.88329     58 - -
          2.68618  4.42225  2.77519  2.73123  3.46354  2.40513  3.72494  3.29354  2.67741  2.69355  4.24690  2.90346  2.73739  3.18146  2.89801  2.37887  2.77519  2.98518  4.58477  3.61503
          0.01097  4.91385  5.63619  0.61958  0.77255  1.29417  0.32038
     26   2.44775  5.26110  2.88674  2.47860  3.53665  3.28737  3.63643  4.03067  2.27775  3.43268  4.31157  2.95751  1.77614  2.84498  2.98392  2.65680  2.77896  3.56115  5.71626  4.13747     59 - -
          2.68618  4.42225  2.77519  2.73123  3.46354  2.40513  3.72494  3.29354  2.67741  2.69355  4.24690  2.90346  2.73739  3.18146  2.89801  2.37887  2.77519  2.98518  4.58477  3.61503
          0.01097  4.91385  5.63619  0.61958  0.77255  0.24315  1.53320
     27   2.82901  4.64920  3.04841  2.77608  3.34345  1.17389  3.58218  3.91165  2.68152  3.33741  4.31074  3.02331  4.22540  3.05589  3.29701  2.87801  3.08484  3.57937  5.73905  3.45765     60 - -
          2.68618  4.42225  2.77519  2.73123  3.46354  2.40513  3.72494  3.29354  2.67741  2.69355  4.24690  2.90346  2.73739  3.18146  2.89801  2.37887  2.77519  2.98518  4.58477  3.61503
          0.01392  5.28021  4.74050  0.61958  0.77255  0.51407  0.91144
     28   2.31182  5.51305  2.79893  1.77692  4.85745  2.27717  3.70707  3.41769  2.28495  3.81805  4.55390  3.01386  3.54382  2.42208  3.16422  2.73567  2.98600  3.60341  5.94613  4.53555     61 - -
          2.68618  4.42225  2.77519  2.73123  3.46354  2.40513  3.72494  3.29354  2.67741  2.69355  4.24690  2.90346  2.73739  3.18146  2.89801  2.37887  2.77519  2.98518  4.58477  3.61503
          0.01469  5.28530  4.65465  0.61958  0.77255  0.50453  0.92581
     29   2.78781  5.51167  2.90766  2.26633  4.78093  3.30567  3.68719  4.06427  2.29698  3.81621  4.16690  3.12989  3.74115  2.70083  2.73990  1.88880  1.85984  3.67269  5.94539  4.09819     62 - -
          2.68618  4.42225  2.77519  2.73123  3.46354  2.40513  3.72494  3.29354  2.67741  2.69355  4.24690  2.90346  2.73739  3.18146  2.89801  2.37887  2.77519  2.98518  4.58477  3.61503
          0.00753  5.28816  6.01051  0.61958  0.77255  0.51115  0.91581
     30   2.87166  5.23754  2.78393  2.62187  1.90395  3.77504  3.39148  3.90084  2.45789  3.08597  4.11430  3.32483  4.23540  3.06938  2.08221  3.04714  3.18909  3.44609  2.91978  3.37828     63 - -
          2.68618  4.42225  2.77519  2.73123  3.46354  2.40513  3.72494  3.29354  2.67741  2.69355  4.24690  2.90346  2.73739  3.18146  2.89801  2.37887  2.77519  2.98518  4.58477  3.61503
          0.00748  5.29518  6.01752  0.61958  0.77255  0.52822  0.89076
     31   2.88491  5.42973  2.30420  2.54108  4.73819  3.73257  3.62584  3.49901  2.66421  3.25774  4.11634  3.15916  3.80853  2.74721  2.61632  2.42319  1.75282  2.86656  5.00196  3.92209     64 - -
          2.68618  4.42225  2.77519  2.73123  3.46354  2.40513  3.72494  3.29354  2.67741  2.69355  4.24690  2.90346  2.73739  3.18146  2.89801  2.37887  2.77519  2.98518  4.58477  3.61503
          0.00748  5.29518  6.01752  0.61958  0.77255  0.52822  0.89076
     32   2.53239  4.50228  4.70777  4.11317  2.84053  4.19772  3.69645  2.53389  3.96273  2.65447  3.61872  4.24544  3.07503  3.94883  4.08345  3.49381  3.27587  2.35315  5.10295  1.12591     65 - -
          2.68618  4.42225  2.77519  2.73123  3.46354  2.40513  3.72494  3.29354  2.67741  2.69355  4.24690  2.90346  2.73739  3.18146  2.89801  2.37887  2.77519  2.98518  4.58477  3.61503
          0.00748  5.29518  6.01752  0.61958  0.77255  0.52822  0.89076
     33   2.65794  5.51988  2.46052  1.74201  4.86527  3.60471  3.09187  4.35146  2.36949  3.65413  4.56046  2.98054  4.17562  2.85315  2.29355  2.48384  2.56032  3.33338  5.95237  3.98521     66 - -
          2.68618  4.42225  2.77519  2.73123  3.46354  2.40513  3.72494  3.29354  2.67741  2.69355  4.24690  2.90346  2.73739  3.18146  2.89801  2.37887  2.77519  2.98518  4.58477  3.61503
          0.00748  5.29518  6.01752  0.61958  0.77255  0.52822  0.89076
     34   3.47131  4.81511  5.29496  4.75152  0.95108  3.76426  4.50569  2.54131  4.54146  2.59183  3.92557  4.64226  4.93044  4.61292  4.53362  3.90215  3.70066  2.84585  3.32779  1.79464     67 - -
          2.68618  4.42225  2.77519  2.73123  3.46354  2.40513  3.72494  3.29354  2.67741  2.69355  4.24690  2.90346  2.73739  3.18146  2.89801  2.37887  2.77519  2.98518  4.58477  3.61503
          0.00748  5.29518  6.01752  0.61958  0.77255  0.52822  0.89076
     35   2.75082  5.19117  2.70152  2.33046  4.85167  3.68810  3.45520  3.83183  2.32092  3.70927  4.55203  3.16649  2.44589  2.79036  2.48312  2.65979  1.96058  3.01295  5.94533  4.53667     68 - -
          2.68618  4.42225  2.77519  2.73123  3.46354  2.40513  3.72494  3.29354  2.67741  2.69355  4.24690  2.90346  2.73739  3.18146  2.89801  2.37887  2.77519  2.98518  4.58477  3.61503
          0.00748  5.29518  6.01752  0.61958  0.77255  0.52822  0.89076
     36   2.24520  4.32077  4.86069  4.25736  3.23736  4.22274  4.54802  2.24200  4.08003  1.69740  3.41465  2.67890  2.65052  4.24429  4.15057  3.52648  3.24097  1.65401  5.09738  3.91689     69 - -
          2.68618  4.42225  2.77519  2.73123  3.46354  2.40513  3.72494  3.29354  2.67741  2.69355  4.24690  2.90346  2.73739  3.18146  2.89801  2.37887  2.77519  2.98518  4.58477  3.61503
          0.02721  5.29518  3.82468  0.61958  0.77255  0.46010  0.99756
     37   2.72572  5.50961  2.41285  2.23559  4.62348  3.44248  3.58499  4.06942  2.55400  3.57019  4.55092  2.47764  1.84080  2.89902  2.87421  2.70904  2.96861  3.09320  5.94377  4.53430     70 - -
          2.68618  4.42225  2.77519  2.73123  3.46354  2.40513  3.72494  3.29354  2.67741  2.69355  4.24690  2.90346  2.73739  3.18146  2.89801  2.37887  2.77519  2.98518  4.58477  3.61503
          0.03118  5.28720  3.66330  0.61958  0.77255  0.44386  1.02598
     38   2.78625  4.87005  2.06477  2.39460  4.66844  3.61101  3.35513  4.11282  2.46604  3.63178  4.02635  2.99998  3.33005  1.53462  3.05935  2.96703  3.11332  3.26056  5.93982  4.53111     71 - -
          2.68618  4.42225  2.77519  2.73123  3.46354  2.40513  3.72494  3.29354  2.67741  2.69355  4.24690  2.90346  2.73739  3.18146  2.89801  2.37887  2.77519  2.98518  4.58477  3.61503
          0.00757  5.28355  6.00589  0.61958  0.77255  0.43684  1.03867
     39   2.04368  5.52243  2.53014  2.39247  4.86643  3.08317  3.79004  4.15091  2.50917  3.50642  4.56338  2.93416  1.92108  2.81862  2.72604  2.73060  2.86992  3.82152  5.95574  4.54542     72 - -
          2.68618  4.42225  2.77519  2.73123  3.46354  2.40513  3.72494  3.29354  2.67741  2.69355  4.24690  2.90346  2.73739  3.18146  2.89801  2.37887  2.77519  2.98518  4.58477  3.61503
          0.15096  5.30656  2.00130  0.61958  0.77255  0.48576  0.95510
     40   1.77781  5.17189  3.23636  2.75960  4.44900  1.50608  4.01757  3.86974  2.81600  3.18073  4.27622  3.33342  3.41766  3.16528  3.19185  2.36359  3.16511  3.53466  5.26457  4.36757     73 - -
          2.68618  4.42225  2.77519  2.73123  3.46354  2.40513  3.72494  3.29354  2.67741  2.69355  4.24690  2.90346  2.73739  3.18146  2.89801  2.37887  2.77519  2.98518  4.58477  3.61503
          0.00853  5.16413  5.88648  0.61958  0.77255  0.29444  1.36629
     41   1.84636  4.70528  3.43029  2.69020  3.85664  3.14604  3.13299  3.76778  2.86512  3.42971  4.18797  3.39093  4.24756  2.95674  3.00433  2.53190  1.53833  3.31443  5.72147  4.26281     74 - -
          2.68611  4.42171  2.77547  2.73151  3.46382  2.40412  3.72504  3.29382  2.67769  2.69373  4.24717  2.90371  2.73663  3.18163  2.89826  2.37873  2.77541  2.98546  4.58505  3.61531
          0.22131  1.67615  4.47098  0.96256  0.48113  0.48576  0.95510
     42   3.01338  4.49058  4.72920  4.13217  2.55727  4.19584  3.75844  2.57729  3.97735  2.40509  3.24679  4.14002  4.38018  4.16309  3.67100  3.32642  1.37613  2.69581  5.10608  1.94118     82 - -
          2.68618  4.42225  2.77519  2.73123  3.46354  2.40513  3.72494  3.29354  2.67741  2.69355  4.24690  2.90346  2.73739  3.18146  2.89801  2.37887  2.77519  2.98518  4.58477  3.61503
          0.42025  5.29749  1.08438  0.61958  0.77255  0.46507  0.98911
     43   2.48985  2.94472  4.11041  3.80469  2.87462  3.79724  4.27950  2.75952  3.67262  1.51848  3.35545  3.18813  4.33997  3.68749  3.82816  3.15515  2.98250  2.56673  4.92757  2.18923     83 - -
          2.68618  4.42225  2.77519  2.73123  3.46354  2.40513  3.72494  3.29354  2.67741  2.69355  4.24690  2.90346  2.73739  3.18146  2.89801  2.37887  2.77519  2.98518  4.58477  3.61503
          0.01110  4.90212  5.62446  0.61958  0.77255  0.18533  1.77686
     44   4.48452  5.69319  5.90222  5.55177  2.22934  5.40635  4.62907  3.82021  5.31181  2.81378  4.11171  5.22188  5.67137  5.22109  5.24938  4.77714  4.25142  3.71613  0.44581  3.06016     84 - -
          2.68618  4.42225  2.77519  2.73123  3.46354  2.40513  3.72494  3.29354  2.67741  2.69355  4.24690  2.90346  2.73739  3.18146  2.89801  2.37887  2.77519  2.98518  4.58477  3.61503
          0.00739  5.30656  6.02891  0.61958  0.77255  0.48576  0.95510
     45   3.09135  4.88809  5.32440  4.76761  2.20023  4.66925  4.67121  2.99708  4.57543  2.48696  2.81315  4.73026  4.99785  4.65683  4.59268  3.98918  3.76624  3.02489  4.99221  0.75819     85 - -
          2.68618  4.42225  2.77519  2.73123  3.46354  2.40513  3.72494  3.29354  2.67741  2.69355  4.24690  2.90346  2.73739  3.18146  2.89801  2.37887  2.77519  2.98518  4.58477  3.61503
          0.00739  5.30656  6.02891  0.61958  0.77255  0.48576  0.95510
     46   5.55978  6.76525  5.57699  5.57045  5.36377  5.34643  0.05883  6.56577  5.50074  5.76913  7.02762  5.87663  5.98828  6.00550  5.58105  5.69915  5.96072  6.24829  6.66031  5.31830     86 - -
          2.68618  4.42225  2.77519  2.73123  3.46354  2.40513  3.72494  3.29354  2.67741  2.69355  4.24690  2.90346  2.73739  3.18146  2.89801  2.37887  2.77519  2.98518  4.58477  3.61503
          0.00739  5.30656  6.02891  0.61958  0.77255  0.48576  0.95510
     47   2.67186  5.44475  1.96624  3.17947  5.25824  3.87469  4.54108  4.73800  3.40627  4.28142  5.05582  3.65641  1.07592  3.68898  3.89190  1.84203  2.93849  4.21666  6.44575  5.07730     87 - -
          2.68618  4.42225  2.77519  2.73123  3.46354  2.40513  3.72494  3.29354  2.67741  2.69355  4.24690  2.90346  2.73739  3.18146  2.89801  2.37887  2.77519  2.98518  4.58477  3.61503
          0.00739  5.30656  6.02891  0.61958  0.77255  0.48576  0.95510
     48   5.55978  6.76525  5.57699  5.57045  5.36377  5.34643  0.05883  6.56577  5.50074  5.76913  7.02762  5.87663  5.98828  6.00550  5.58105  5.69915  5.96072  6.24829  6.66031  5.31830     88 - -
          2.68618  4.42225  2.77519  2.73123  3.46354  2.40513  3.72494  3.29354  2.67741  2.69355  4.24690  2.90346  2.73739  3.18146  2.89801  2.37887  2.77519  2.98518  4.58477  3.61503
          0.00739  5.30656  6.02891  0.61958  0.77255  0.48576  0.95510
     49   2.38242  3.69259  3.78560  3.18504  3.42339  3.60767  3.72600  3.02818  3.08560  2.38164  3.43931  3.50718  2.71083  2.65109  2.92229  2.88478  2.39704  2.22336  5.38401  3.33092     89 - -
          2.68618  4.42225  2.77519  2.73123  3.46354  2.40513  3.72494  3.29354  2.67741  2.69355  4.24690  2.90346  2.73739  3.18146  2.89801  2.37887  2.77519  2.98518  4.58477  3.61503
          0.02775  5.30656  3.79827  0.61958  0.77255  0.48576  0.95510
     50   2.84486  4.22492  2.66471  2.57866  4.69410  2.64035  1.73749  4.06324  2.64167  2.79744  3.09672  2.83466  4.02451  3.08253  2.80633  2.86568  3.22358  3.34900  5.85875  4.33685     90 - -
          2.68618  4.42225  2.77519  2.73123  3.46354  2.40513  3.72494  3.29354  2.67741  2.69355  4.24690  2.90346  2.73739  3.18146  2.89801  2.37887  2.77519  2.98518  4.58477  3.61503
          0.00755  5.28636  6.00870  0.61958  0.77255  0.44221  1.02894
     51   2.76048  5.32692  2.73248  2.67400  4.20760  1.63340  3.48673  4.03262  2.78814  2.59059  3.77043  3.27727  3.39790  3.10951  3.25536  2.20445  2.77695  3.37437  5.80759  4.15605     91 - -
          2.68618  4.42225  2.77519  2.73123  3.46354  2.40513  3.72494  3.29354  2.67741  2.69355  4.24690  2.90346  2.73739  3.18146  2.89801  2.37887  2.77519  2.98518  4.58477  3.61503
          0.01653  5.30656  4.47098  0.61958  0.77255  0.48576  0.95510
     52   2.46869  5.26538  3.02968  2.71867  3.12538  3.70635  3.12170  3.11546  2.50481  2.89129  3.83588  3.21250  4.22972  2.24604  2.79790  2.32385  2.91849  2.54789  5.75857  3.67868     92 - -
          2.68618  4.42225  2.77519  2.73123  3.46354  2.40513  3.72494  3.29354  2.67741  2.69355  4.24690  2.90346  2.73739  3.18146  2.89801  2.37887  2.77519  2.98518  4.58477  3.61503
          0.00746  5.29749  6.01984  0.61958  0.77255  0.51977  0.90302
     53   2.71625  5.31946  3.17911  2.08179  4.49748  3.50417  4.02343  3.81023  2.67732  3.07929  4.10055  3.05431  4.21714  3.04448  3.12347  2.87519  1.37454  2.73469  5.80078  3.94841     93 - -
          2.68618  4.42225  2.77519  2.73123  3.46354  2.40513  3.72494  3.29354  2.67741  2.69355  4.24690  2.90346  2.73739  3.18146  2.89801  2.37887  2.77519  2.98518  4.58477  3.61503
          0.00746  5.29749  6.01984  0.61958  0.77255  0.46507  0.98911
     54   1.73514  5.52391  2.54214  2.45703  4.86807  2.45571  3.89900  4.24541  2.64521  3.72561  4.45029  3.02094  4.03339  2.03440  2.44181  2.79998  3.16516  3.91407  5.95708  4.54662     94 - -
          2.68618  4.42225  2.77519  2.73123  3.46354  2.40513  3.72494  3.29354  2.67741  2.69355  4.24690  2.90346  2.73739  3.18146  2.89801  2.37887  2.77519  2.98518  4.58477  3.61503
          0.00739  5.30656  6.02891  0.61958  0.77255  0.48576  0.95510
     55   2.69662  5.44254  3.09972  2.05629  4.40469  3.66242  3.16081  4.07431  2.56547  2.14895  3.82890  3.13475  3.23488  2.71217  2.28955  2.87866  3.03034  2.69171  5.89602  4.06661     95 - -
          2.68618  4.42225  2.77519  2.73123  3.46354  2.40513  3.72494  3.29354  2.67741  2.69355  4.24690  2.90346  2.73739  3.18146  2.89801  2.37887  2.77519  2.98518  4.58477  3.61503
          0.16141  5.30656  1.93728  0.61958  0.77255  0.48576  0.95510
     56   2.73227  5.49047  2.75129  2.38194  4.83257  2.74391  3.28985  4.31937  2.67714  3.79440  4.53350  2.21108  4.13398  1.41875  3.05834  2.83493  3.21054  3.79821  5.92339  4.50930     96 - -
          2.68618  4.42225  2.77519  2.73123  3.46354  2.40513  3.72494  3.29354  2.67741  2.69355  4.24690  2.90346  2.73739  3.18146  2.89801  2.37887  2.77519  2.98518  4.58477  3.61503
          0.00862  5.15377  5.87612  0.61958  0.77255  0.91940  0.50876
     57   2.50566  4.52631  4.21318  3.55405  3.63871  3.84893  3.89877  2.81298  3.09294  2.16287  3.25760  3.83107  4.41140  3.80143  2.48875  3.26691  3.14100  1.25659  5.12938  3.63657     97 - -
          2.68618  4.42225  2.77519  2.73123  3.46354  2.40513  3.72494  3.29354  2.67741  2.69355  4.24690  2.90346  2.73739  3.18146  2.89801  2.37887  2.77519  2.98518  4.58477  3.61503
          0.23900  5.15377  1.57597  0.61958  0.77255  0.91940  0.50876
     58   2.22700  4.34965  4.31039  3.72413  2.80271  3.45167  3.83793  2.79909  3.52988  2.43811  3.39220  3.93959  4.33628  3.52586  3.79427  2.75883  2.96510  2.30565  2.77899  1.86124     98 - -
          2.68618  4.42225  2.77519  2.73123  3.46354  2.40513  3.72494  3.29354  2.67741  2.69355  4.24690  2.90346  2.73739  3.18146  2.89801  2.37887  2.77519  2.98518  4.58477  3.61503
          0.01084  4.92562  5.64796  0.61958  0.77255  1.28043  0.32562
     59   2.11057  5.28193  3.13123  2.51200  4.59648  2.89475  3.60156  4.06029  2.21518  3.57336  2.40733  2.86886  4.02850  2.65356  2.36687  2.48329  3.08130  3.65613  5.73263  4.22501     99 - -
          2.68619  4.42226  2.77521  2.73124  3.46355  2.40514  3.72496  3.29355  2.67742  2.69356  4.24691  2.90348  2.73741  3.18148  2.89802  2.37885  2.77515  2.98520  4.58478  3.61478
          0.03460  3.65712  4.80354  0.64328  0.74563  0.19094  1.74977
     60   3.18059  5.04037  4.00685  3.59727  3.78309  0.60539  4.31529  3.66604  3.53467  2.80889  4.26321  3.96334  4.61293  3.69098  3.84603  3.44095  3.56616  3.42287  5.46513  3.77563    102 - -
          2.68618  4.42225  2.77519  2.73123  3.46354  2.40513  3.72494  3.29354  2.67741  2.69355  4.24690  2.90346  2.73739  3.18146  2.89801  2.37887  2.77519  2.98518  4.58477  3.61503
          0.00742  5.30336  6.02571  0.61958  0.77255  0.47823  0.96727
     61   3.39436  5.38227  5.99187  5.39477  3.76947  5.39051  5.69042  2.71877  5.22652  0.39452  2.65010  5.53416  5.53391  4.53089  5.20514  4.74509  4.31697  2.97619  5.85824  4.85522    103 - -
          2.68618  4.42225  2.77519  2.73123  3.46354  2.40513  3.72494  3.29354  2.67741  2.69355  4.24690  2.90346  2.73739  3.18146  2.89801  2.37887  2.77519  2.98518  4.58477  3.61503
          0.00739  5.30656  6.02891  0.61958  0.77255  0.48576  0.95510
     62   1.36658  4.57834  4.38648  3.73558  2.72572  3.18410  3.91586  2.99857  3.70591  2.59033  3.69153  4.06529  4.51074  3.88090  3.83018  2.70481  2.95742  2.32775  5.18510  2.25564    104 - -
          2.68618  4.42225  2.77519  2.73123  3.46354  2.40513  3.72494  3.29354  2.67741  2.69355  4.24690  2.90346  2.73739  3.18146  2.89801  2.37887  2.77519  2.98518  4.58477  3.61503
          0.00739  5.30656  6.02891  0.61958  0.77255  0.48576  0.95510
     63   1.98997  5.00248  4.37557  3.76159  4.62277  0.57660  4.93935  4.09200  3.93727  3.35403  4.50464  4.16859  4.58918  4.24222  4.24842  3.32605  3.37963  3.63322  6.18078  4.96743    105 - -
          2.68618  4.42225  2.77519  2.73123  3.46354  2.40513  3.72494  3.29354  2.67741  2.69355  4.24690  2.90346  2.73739  3.18146  2.89801  2.37887  2.77519  2.98518  4.58477  3.61503
          0.24862  5.30656  1.53634  0.61958  0.77255  0.48576  0.95510
     64   1.86632  4.48490  4.15985  3.58215  2.45533  3.77459  4.27739  2.94740  3.49653  2.07298  3.27046  3.41555  2.10446  3.40758  3.75149  3.21862  2.88805  2.43544  5.08825  3.88392    106 - -
          2.68618  4.42225  2.77519  2.73123  3.46354  2.40513  3.72494  3.29354  2.67741  2.69355  4.24690  2.90346  2.73739  3.18146  2.89801  2.37887  2.77519  2.98518  4.58477  3.61503
          0.00940  5.06734  5.78968  0.61958  0.77255  0.23823  1.55127
     65   2.91276  3.95141  5.03027  4.41531  2.56503  4.13844  3.91076  2.12131  4.20139  1.24663  2.99729  4.40150  3.85945  4.33360  4.21150  3.55195  3.16780  2.38480  5.06942  2.38330    107 - -
          2.68618  4.42225  2.77519  2.73123  3.46354  2.40513  3.72494  3.29354  2.67741  2.69355  4.24690  2.90346  2.73739  3.18146  2.89801  2.37887  2.77519  2.98518  4.58477  3.61503
          0.00739  5.30656  6.02891  0.61958  0.77255  0.48576  0.95510
     66   3.02519  4.45570  4.26907  4.22925  2.68863  4.23629  3.90345  1.25749  4.16715  2.01738  3.37124  4.38060  4.60040  4.15040  4.08434  3.42936  3.30483  1.66740  5.07706  3.80717    108 - -
          2.68618  4.42225  2.77519  2.73123  3.46354  2.40513  3.72494  3.29354  2.67741  2.69355  4.24690  2.90346  2.73739  3.18146  2.89801  2.37887  2.77519  2.98518  4.58477  3.61503
          0.00739  5.30656  6.02891  0.61958  0.77255  0.48576  0.95510
     67   3.66485  5.00906  5.79652  5.25460  4.18798  5.16097  5.64524  1.49123  5.11737  1.66170  3.87680  5.32199  5.43504  5.27661  5.18056  4.52679  3.71618  0.86473  6.03456  4.21969    109 - -
          2.68618  4.42225  2.77519  2.73123  3.46354  2.40513  3.72494  3.29354  2.67741  2.69355  4.24690  2.90346  2.73739  3.18146  2.89801  2.37887  2.77519  2.98518  4.58477  3.61503
          0.00739  5.30656  6.02891  0.61958  0.77255  0.48576  0.95510
     68   2.72154  5.24040  2.71987  1.69203  3.88190  3.85161  3.75015  2.59375  2.85059  3.00570  4.30972  3.37835  4.24162  3.13914  2.10010  2.92406  3.13368  2.46778  5.73987  3.98863    110 - -
          2.68618  4.42225  2.77519  2.73123  3.46354  2.40513  3.72494  3.29354  2.67741  2.69355  4.24690  2.90346  2.73739  3.18146  2.89801  2.37887  2.77519  2.98518  4.58477  3.61503
          0.01366  5.30656  4.75490  0.61958  0.77255  0.48576  0.95510
     69   2.99492  5.53300  1.57340  1.98916  4.87840  2.63662  3.83932  4.36528  2.48278  3.83840  4.57389  3.02781  3.01999  2.80983  2.88449  2.68045  2.86609  3.85432  5.96513  4.55285    111 - -
          2.68618  4.42225  2.77519  2.73123  3.46354  2.40513  3.72494  3.29354  2.67741  2.69355  4.24690  2.90346  2.73739  3.18146  2.89801  2.37887  2.77519  2.98518  4.58477  3.61503
          0.10751  5.30034  2.33361  0.61958  0.77255  0.48868  0.95045
     70   2.24222  5.47401  1.87863  2.15968  4.81717  3.29422  3.84606  4.06815  2.31606  3.71871  4.51528  3.17285  2.26579  2.94898  2.95531  2.83615  2.82781  3.80945  5.90777  4.49775    112 - -
          2.68618  4.42225  2.77519  2.73123  3.46354  2.40513  3.72494  3.29354  2.67741  2.69355  4.24690  2.90346  2.73739  3.18146  2.89801  2.37887  2.77519  2.98518  4.58477  3.61503
          0.19433  5.20475  1.76536  0.61958  0.77255  0.75042  0.63898
     71   2.14130  5.06082  2.43009  1.99580  4.58550  3.24632  3.30752  3.68983  2.40253  2.88457  4.42634  2.80428  3.54705  2.68032  2.88414  2.71411  2.94191  3.34421  5.82056  4.41352    113 - -
          2.68618  4.42225  2.77519  2.73123  3.46354  2.40513  3.72494  3.29354  2.67741  2.69355  4.24690  2.90346  2.73739  3.18146  2.89801  2.37887  2.77519  2.98518  4.58477  3.61503
          0.08141  5.03135  2.63591  0.61958  0.77255  0.89229  0.52715
     72   2.48010  5.39230  2.03905  1.90313  4.73594  3.52499  3.63521  4.00224  2.41911  3.37995  4.43336  2.53834  3.05256  2.76339  2.75101  2.81691  3.00709  3.29098  5.82582  4.41570    114 - -
          2.68568  4.42331  2.77422  2.73104  3.46440  2.40524  3.72590  3.29422  2.67786  2.69240  4.24694  2.90415  2.73639  3.18192  2.89714  2.37901  2.77577  2.98610  4.58583  3.61515
          1.32676  0.35114  3.48095  1.25556  0.33535  0.28394  1.39761
     73   2.43206  5.24669  2.71637  2.53411  3.90722  3.71772  3.61795  2.94276  2.79078  1.80506  4.22612  2.92184  3.05257  3.05406  2.80014  2.53680  3.01305  3.23271  5.73984  4.07009    128 - -
          2.68618  4.42225  2.77519  2.73123  3.46354  2.40513  3.72494  3.29354  2.67741  2.69355  4.24690  2.90346  2.73739  3.18146  2.89801  2.37887  2.77519  2.98518  4.58477  3.61503
          0.17813  5.25941  1.84538  0.61958  0.77255  0.59283  0.80466
     74   2.65962  5.41362  2.65761  2.06090  4.75146  3.25434  3.88416  4.23240  2.48919  2.90726  4.45623  2.95248  1.81608  2.81573  2.76682  2.80428  2.95435  3.74599  5.85060  3.92052    129 - -
          2.68618  4.42225  2.77519  2.73123  3.46354  2.40513  3.72494  3.29354  2.67741  2.69355  4.24690  2.90346  2.73739  3.18146  2.89801  2.37887  2.77519  2.98518  4.58477  3.61503
          0.00908  5.10177  5.82411  0.61958  0.77255  0.65169  0.73640
     75   2.25812  5.42508  2.97161  2.14860  4.75226  3.34144  3.27818  3.20216  2.34246  2.53954  4.34425  2.86750  2.57900  2.83725  2.77563  2.68786  3.18909  3.57855  4.54543  4.46871    130 - -
          2.68618  4.42225  2.77519  2.73123  3.46354  2.40513  3.72494  3.29354  2.67741  2.69355  4.24690  2.90346  2.73739  3.18146  2.89801  2.37887  2.77519  2.98518  4.58477  3.61503
          0.01772  5.18640  4.42483  0.61958  0.77255  0.59904  0.79704
     76   2.71570  5.44161  3.00486  2.30053  4.76778  3.02503  3.78311  3.20412  2.59569  2.75442  4.48727  2.94978  2.44340  2.49440  2.76042  2.60290  2.37140  3.19816  5.88577  4.28223    131 - -
          2.68618  4.42225  2.77519  2.73123  3.46354  2.40513  3.72494  3.29354  2.67741  2.69355  4.24690  2.90346  2.73739  3.18146  2.89801  2.37887  2.77519  2.98518  4.58477  3.61503
          0.01589  5.22705  4.56632  0.61958  0.77255  0.51521  0.90974
     77   2.23747  5.11254  2.80957  2.46802  4.29766  3.09283  3.79127  4.27860  2.07366  3.77040  4.51534  3.08117  3.45554  2.94592  2.65172  2.26395  3.12649  3.42736  3.07008  2.81512    132 - -
          2.68618  4.42225  2.77519  2.73123  3.46354  2.40513  3.72494  3.29354  2.67741  2.69355  4.24690  2.90346  2.73739  3.18146  2.89801  2.37887  2.77519  2.98518  4.58477  3.61503
          0.03220  5.26300  3.63023  0.61958  0.77255  0.43130  1.04886
     78   2.28415  5.25115  2.73585  2.66302  3.14219  1.72137  3.59186  3.78398  2.82098  3.41749  4.31823  2.91877  3.59008  3.09186  3.28991  2.95995  3.19276  2.93934  5.74528  2.70130    133 - -
          2.68618  4.42225  2.77519  2.73123  3.46354  2.40513  3.72494  3.29354  2.67741  2.69355  4.24690  2.90346  2.73739  3.18146  2.89801  2.37887  2.77519  2.98518  4.58477  3.61503
          0.00762  5.27721  5.99956  0.61958  0.77255  0.50068  0.93170
     79   2.49812  5.34081  1.82654  2.26797  4.61747  3.53466  3.98093  3.25231  2.45250  2.87869  3.68586  3.06893  4.20943  2.93508  3.03954  2.92616  3.14394  2.33412  4.64396  3.95413    134 - -
          2.68618  4.42225  2.77519  2.73123  3.46354  2.40513  3.72494  3.29354  2.67741  2.69355  4.24690  2.90346  2.73739  3.18146  2.89801  2.37887  2.77519  2.98518  4.58477  3.61503
          0.01186  5.29270  4.99612  0.61958  0.77255  0.53717  0.87803
     80   2.54607  5.51088  2.12710  2.35322  4.06850  3.70128  3.43013  4.21459  2.38251  3.37573  4.55210  2.97270  3.26952  2.48510  2.17183  2.90212  3.15064  3.59287  5.94484  2.76518    135 - -
          2.68618  4.42225  2.77519  2.73123  3.46354  2.40513  3.72494  3.29354  2.67741  2.69355  4.24690  2.90346  2.73739  3.18146  2.89801  2.37887  2.77519  2.98518  4.58477  3.61503
          0.00753  5.28836  6.01071  0.61958  0.77255  0.44614  1.02190
     81   3.68837  6.72077  1.04735  0.86794  5.98561  4.07143  4.69830  5.56917  3.83489  5.00132  5.88397  3.50974  4.74687  3.63587  4.52821  3.78399  3.50322  5.08470  7.14713  5.53731    136 - -
          2.68618  4.42225  2.77519  2.73123  3.46354  2.40513  3.72494  3.29354  2.67741  2.69355  4.24690  2.90346  2.73739  3.18146  2.89801  2.37887  2.77519  2.98518  4.58477  3.61503
          0.00739  5.30656  6.02891  0.61958  0.77255  0.48576  0.95510
     82   2.95182  4.34812  4.63511  3.23450  3.18903  4.18480  3.19471  1.68169  3.36475  2.22523  3.63127  4.20714  4.55291  3.71641  2.62927  3.41840  3.13237  1.88049  3.35644  3.04622    137 - -
          2.68618  4.42225  2.77519  2.73123  3.46354  2.40513  3.72494  3.29354  2.67741  2.69355  4.24690  2.90346  2.73739  3.18146  2.89801  2.37887  2.77519  2.98518  4.58477  3.61503
          0.00739  5.30656  6.02891  0.61958  0.77255  0.48576  0.95510
     83   2.92529  4.51324  4.12387  3.96499  3.08829  4.18656  3.88066  2.47736  3.91358  2.36456  3.62932  4.15500  1.58127  4.06236  4.05538  3.47901  2.42270  1.67105  4.95978  3.73628    138 - -
          2.68618  4.42225  2.77519  2.73123  3.46354  2.40513  3.72494  3.29354  2.67741  2.69355  4.24690  2.90346  2.73739  3.18146  2.89801  2.37887  2.77519  2.98518  4.58477  3.61503
          0.00739  5.30656  6.02891  0.61958  0.77255  0.48576  0.95510
     84   3.24502  4.51681  5.33194  4.72125  3.13538  4.55607  4.88978  2.00623  4.51466  0.95006  3.19547  4.72211  4.88074  4.61105  4.51212  3.87603  3.58518  1.71904  3.85202  4.17289    139 - -
          2.68618  4.42225  2.77519  2.73123  3.46354  2.40513  3.72494  3.29354  2.67741  2.69355  4.24690  2.90346  2.73739  3.18146  2.89801  2.37887  2.77519  2.98518  4.58477  3.61503
          0.00739  5.30656  6.02891  0.61958  0.77255  0.48576  0.95510
     85   2.54658  4.09133  5.01922  4.40525  2.83149  4.24099  4.57388  1.93860  4.19418  2.11246  2.47383  3.81269  4.46154  4.00610  4.20874  3.32218  3.08774  1.33437  5.07282  3.89642    140 - -
          2.68618  4.42225  2.77519  2.73123  3.46354  2.40513  3.72494  3.29354  2.67741  2.69355  4.24690  2.90346  2.73739  3.18146  2.89801  2.37887  2.77519  2.98518  4.58477  3.61503
          0.00739  5.30656  6.02891  0.61958  0.77255  0.48576  0.95510
     86   2.98817  4.58589  5.19127  4.58494  2.86625  4.27015  4.77146  1.67748  4.38110  1.01047  3.45873  4.58481  4.77367  4.51047  4.39614  3.54595  3.38709  2.09886  5.24756  4.07763    141 - -
          2.68618  4.42225  2.77519  2.73123  3.46354  2.40513  3.72494  3.29354  2.67741  2.69355  4.24690  2.90346  2.73739  3.18146  2.89801  2.37887  2.77519  2.98518  4.58477  3.61503
          0.00739  5.30656  6.02891  0.61958  0.77255  0.48576  0.95510
     87   2.84256  4.51635  2.27406  2.60052  4.60925  3.66086  2.84278  4.35370  2.17562  3.77408  4.02894  2.99214  4.18152  1.71983  2.73434  2.42808  2.78501  3.91390  5.95651  4.54587    142 - -
          2.68618  4.42225  2.77519  2.73123  3.46354  2.40513  3.72494  3.29354  2.67741  2.69355  4.24690  2.90346  2.73739  3.18146  2.89801  2.37887  2.77519  2.98518  4.58477  3.61503
          0.00739  5.30656  6.02891  0.61958  0.77255  0.48576  0.95510
     88   3.34368  5.89253  0.70838  2.31143  5.21160  3.67583  3.97738  4.46874  2.86559  4.18658  4.95598  3.17010  4.40510  3.18163  3.61067  3.12339  3.35973  3.94898  6.32521  4.87668    143 - -
          2.68618  4.42225  2.77519  2.73123  3.46354  2.40513  3.72494  3.29354  2.67741  2.69355  4.24690  2.90346  2.73739  3.18146  2.89801  2.37887  2.77519  2.98518  4.58477  3.61503
          0.00739  5.30656  6.02891  0.61958  0.77255  0.48576  0.95510
     89   2.97811  4.58751  4.36051  3.77951  2.47912  4.13446  4.21411  2.63835  2.46614  2.14006  3.66291  4.04941  4.50630  3.42376  2.09520  3.41005  3.16809  2.58050  2.05708  3.64111    144 - -
          2.68618  4.42225  2.77519  2.73123  3.46354  2.40513  3.72494  3.29354  2.67741  2.69355  4.24690  2.90346  2.73739  3.18146  2.89801  2.37887  2.77519  2.98518  4.58477  3.61503
          0.02169  5.30656  4.10482  0.61958  0.77255  0.48576  0.95510
     90   2.52471  5.41221  3.04915  2.61253  4.35091  3.53744  3.42409  3.86842  2.52614  2.61312  3.65656  3.12698  3.84741  2.92189  2.06186  2.06790  2.36285  3.31814  5.13954  4.48778    145 - -
          2.68618  4.42225  2.77519  2.73123  3.46354  2.40513  3.72494  3.29354  2.67741  2.69355  4.24690  2.90346  2.73739  3.18146  2.89801  2.37887  2.77519  2.98518  4.58477  3.61503
          0.01360  5.29237  4.77073  0.61958  0.77255  0.49620  0.93864
     91   3.01061  4.49227  3.04744  4.00170  1.62441  4.06788  4.41413  2.41319  3.76889  1.64225  3.60895  4.08640  4.04485  4.05198  3.89432  3.23446  2.93628  2.22951  4.89138  3.36080    146 - -
          2.68618  4.42225  2.77519  2.73123  3.46354  2.40513  3.72494  3.29354  2.67741  2.69355  4.24690  2.90346  2.73739  3.18146  2.89801  2.37887  2.77519  2.98518  4.58477  3.61503
          0.01553  5.29335  4.56765  0.61958  0.77255  0.53482  0.88135
     92   2.60801  5.50793  1.96610  2.50522  4.85022  2.57314  3.30567  3.98680  2.47978  3.40246  4.21910  2.24297  4.17208  2.98399  2.93656  2.42072  2.66476  3.48369  5.94228  4.38274    147 - -
          2.68618  4.42225  2.77519  2.73123  3.46354  2.40513  3.72494  3.29354  2.67741  2.69355  4.24690  2.90346  2.73739  3.18146  2.89801  2.37887  2.77519  2.98518  4.58477  3.61503
          0.26648  5.28538  1.47464  0.61958  0.77255  0.51929  0.90373
     93   2.01847  4.89950  2.56254  1.86180  4.53280  2.83637  3.85435  4.13110  2.39563  3.50947  4.43395  2.73975  3.10763  2.85827  2.86047  2.70918  3.03051  3.49773  5.82739  4.15684    148 - -
          2.68618  4.42225  2.77519  2.73123  3.46354  2.40513  3.72494  3.29354  2.67741  2.69355  4.24690  2.90346  2.73739  3.18146  2.89801  2.37887  2.77519  2.98518  4.58477  3.61503
          0.08435  5.03810  2.59825  0.61958  0.77255  0.70954  0.67702
     94   2.66662  5.40834  1.74265  2.37292  4.63115  2.92604  3.71065  3.58267  2.28116  3.54701  4.21233  2.55648  3.43764  2.88791  3.03511  2.51881  2.83928  3.53661  5.84353  4.43510    149 - -
          2.68618  4.42225  2.77519  2.73123  3.46354  2.40513  3.72494  3.29354  2.67741  2.69355  4.24690  2.90346  2.73739  3.18146  2.89801  2.37887  2.77519  2.98518  4.58477  3.61503
          0.11734  5.07550  2.25883  0.61958  0.77255  0.87797  0.53721
     95   2.50964  5.35248  2.71025  2.60715  4.67559  1.39286  3.82873  4.14499  2.54993  3.55842  4.40543  2.78348  3.98211  2.85412  2.98436  2.61997  2.85979  3.66041  5.80446  4.40750    150 - -
          2.68618  4.42225  2.77519  2.73123  3.46354  2.40513  3.72494  3.29354  2.67741  2.69355  4.24690  2.90346  2.73739  3.18146  2.89801  2.37887  2.77519  2.98518  4.58477  3.61503
          0.17281  5.01464  1.88346  0.61958  0.77255  1.01490  0.45010
     96   2.47863  5.33578  2.91279  2.35178  4.67764  2.81450  3.70360  4.16134  2.37762  3.58108  4.22268  2.81707  3.26716  2.36419  2.55394  2.02384  2.64507  3.56323  5.77037  4.36138    151 - -
          2.68618  4.42225  2.77519  2.73123  3.46354  2.40513  3.72494  3.29354  2.67741  2.69355  4.24690  2.90346  2.73739  3.18146  2.89801  2.37887  2.77519  2.98518  4.58477  3.61503
          0.01764  4.89324  4.60599  0.61958  0.77255  0.70723  0.67926
     97   2.62244  4.87737  3.12809  2.66390  3.23804  3.53964  3.90601  2.64153  2.86564  1.91024  3.81700  3.42543  3.29258  2.38552  3.16294  2.62596  2.67001  3.09821  4.55939  3.99529    152 - -
          2.68618  4.42225  2.77519  2.73123  3.46354  2.40513  3.72494  3.29354  2.67741  2.69355  4.24690  2.90346  2.73739  3.18146  2.89801  2.37887  2.77519  2.98518  4.58477  3.61503
          0.00934  5.07369  5.79604  0.61958  0.77255  0.98091  0.46995
     98   2.31909  4.95025  2.76725  2.72171  3.23692  3.80259  3.84007  2.63106  2.75914  2.58766  3.84395  2.77078  2.16015  3.21734  3.19116  2.82402  3.05740  2.76236  5.48592  4.00930    153 - -
          2.68618  4.42225  2.77519  2.73123  3.46354  2.40513  3.72494  3.29354  2.67741  2.69355  4.24690  2.90346  2.73739  3.18146  2.89801  2.37887  2.77519  2.98518  4.58477  3.61503
          0.01301  5.09268  4.99375  0.61958  0.77255  0.72067  0.66636
     99   2.61945  5.35812  2.11660  2.21729  3.40843  3.65126  3.68058  3.89749  2.66020  3.45594  3.63716  3.05841  3.06022  2.70948  2.87755  2.75515  3.08258  3.21542  5.81526  2.39154    154 - -
          2.68618  4.42225  2.77519  2.73123  3.46354  2.40513  3.72494  3.29354  2.67741  2.69355  4.24690  2.90346  2.73739  3.18146  2.89801  2.37887  2.77519  2.98518  4.58477  3.61503
          0.00856  5.16087  5.88321  0.61958  0.77255  0.90410  0.51903
    100   2.66837  5.38934  2.91543  2.30086  3.76286  3.37357  3.75403  3.96151  2.46751  3.32073  4.04733  2.77110  2.43708  2.61107  2.87909  2.59236  2.70986  3.49812  4.45567  2.65247    155 - -
          2.68618  4.42225  2.77519  2.73123  3.46354  2.40513  3.72494  3.29354  2.67741  2.69355  4.24690  2.90346  2.73739  3.18146  2.89801  2.37887  2.77519  2.98518  4.58477  3.61503
          0.02089  5.16087  4.20370  0.61958  0.77255  0.86393  0.54732
    101   2.56035  5.42228  2.39872  2.38392  4.75399  3.52383  3.67948  3.22199  2.41965  3.03741  3.85565  2.65380  4.03129  2.41946  3.01844  2.20702  2.58523  3.03232  5.86305  4.46029    156 - -
          2.68618  4.42225  2.77519  2.73123  3.46354  2.40513  3.72494  3.29354  2.67741  2.69355  4.24690  2.90346  2.73739  3.18146  2.89801  2.37887  2.77519  2.98518  4.58477  3.61503
          0.02349  5.15632  4.04842  0.61958  0.77255  0.91395  0.51239
    102   2.73552  5.29375  2.65939  2.17444  3.84505  3.41263  3.65271  4.02487  2.45141  1.95621  3.37299  3.16870  3.24020  2.78013  2.92193  2.83712  2.75228  3.19125  5.33475  3.85928    157 - -
          2.68618  4.42225  2.77519  2.73123  3.46354  2.40513  3.72494  3.29354  2.67741  2.69355  4.24690  2.90346  2.73739  3.18146  2.89801  2.37887  2.77519  2.98518  4.58477  3.61503
          0.04598  5.14156  3.24195  0.61958  0.77255  0.86350  0.54764
    103   2.47421  5.35607  2.11568  2.49170  4.06640  2.82125  3.90743  3.59528  2.51938  2.99912  2.97012  2.84693  3.11070  2.79530  2.89839  2.59488  2.93170  3.60032  5.80935  3.69685    158 - -
          2.68618  4.42225  2.77519  2.73123  3.46354  2.40513  3.72494  3.29354  2.67741  2.69355  4.24690  2.90346  2.73739  3.18146  2.89801  2.37887  2.77519  2.98518  4.58477  3.61503
          0.09866  5.12117  2.43060  0.61958  0.77255  0.92380  0.50585
    104   2.60899  4.85250  2.03038  2.23208  4.62916  3.05396  3.78599  3.47954  2.52073  3.18804  3.20338  2.86486  3.28534  2.81637  2.97015  2.66950  3.04154  2.67212  5.77329  4.38448    159 - -
          2.68618  4.42225  2.77519  2.73123  3.46354  2.40513  3.72494  3.29354  2.67741  2.69355  4.24690  2.90346  2.73739  3.18146  2.89801  2.37887  2.77519  2.98518  4.58477  3.61503
          0.00961  5.04561  5.76796  0.61958  0.77255  0.58893  0.80950
    105   2.72176  5.10756  2.74331  2.53896  3.66274  3.32704  3.81683  3.51093  2.63423  2.28802  2.62888  2.63813  3.49483  3.02172  3.17022  2.76200  2.83929  3.14982  3.27194  3.47152    160 - -
          2.68614  4.42800  2.77380  2.73372  3.46591  2.39739  3.72052  3.29733  2.68019  2.69669  4.20373  2.90436  2.73703  3.18313  2.90212  2.37925  2.77503  2.98858  4.58787  3.61989
          1.80680  0.48504  1.51346  2.92705  0.05504  0.79531  0.60046
    106   2.53873  5.33699  2.82452  2.43682  4.66981  2.43282  3.39496  3.89940  2.44105  3.46765  3.61281  2.62647  2.21499  2.82363  2.81514  2.61706  2.84492  3.66440  5.77706  4.37362    244 - -
          2.68618  4.42225  2.77519  2.73123  3.46354  2.40513  3.72494  3.29354  2.67741  2.69355  4.24690  2.90346  2.73739  3.18146  2.89801  2.37887  2.77519  2.98518  4.58477  3.61503
          0.14968  4.95099  2.02542  0.61958  0.77255  0.55937  0.84762
    107   2.55445  5.36599  2.36584  2.27369  4.04936  3.63921  3.13352  4.12245  2.58115  3.54954  3.09335  2.97500  3.36041  2.79610  2.61398  2.12318  2.81160  3.45117  5.80865  3.41087    245 - -
          2.68618  4.42225  2.77519  2.73123  3.46354  2.40513  3.72494  3.29354  2.67741  2.69355  4.24690  2.90346  2.73739  3.18146  2.89801  2.37887  2.77519  2.98518  4.58477  3.61503
          0.01183  5.04566  5.23493  0.61958  0.77255  0.77725  0.61557
    108   2.17153  5.18452  2.16789  2.50661  3.64532  3.07804  3.51638  2.87506  2.54198  3.06824  3.71591  3.06571  3.74441  2.92284  3.00044  2.91082  2.92978  3.07216  3.58212  3.87237    246 - -
          2.68618  4.42225  2.77519  2.73123  3.46354  2.40513  3.72494  3.29354  2.67741  2.69355  4.24690  2.90346  2.73739  3.18146  2.89801  2.37887  2.77519  2.98518  4.58477  3.61503
          0.01816  5.12458  4.41871  0.61958  0.77255  0.74406  0.64470
    109   1.93078  4.97013  3.01973  2.74925  3.59727  2.72061  3.93713  3.39785  2.86688  2.55301  2.46267  3.40213  3.45743  2.76357  3.36029  2.68730  2.95341  2.74139  5.23985  4.10387    247 - -
          2.68618  4.42225  2.77519  2.73123  3.46354  2.40513  3.72494  3.29354  2.67741  2.69355  4.24690  2.90346  2.73739  3.18146  2.89801  2.37887  2.77519  2.98518  4.58477  3.61503
          0.00852  5.16556  5.88791  0.61958  0.77255  0.67586  0.71074
    110   2.34048  5.22520  2.40696  2.69949  4.07027  3.59159  3.57719  3.78675  2.75294  3.04340  2.82106  2.46691  2.74686  2.99626  3.22740  2.35838  3.16863  2.63801  4.69737  3.96665    248 - -
          2.68618  4.42225  2.77519  2.73123  3.46354  2.40513  3.72494  3.29354  2.67741  2.69355  4.24690  2.90346  2.73739  3.18146  2.89801  2.37887  2.77519  2.98518  4.58477  3.61503
          0.03360  5.20960  3.59059  0.61958  0.77255  0.45101  1.01331
    111   2.81019  5.47388  2.64237  2.30873  4.41118  1.51418  3.53857  3.70476  2.57131  3.77445  4.24287  3.09738  4.07609  2.66719  2.73752  2.78097  3.08965  3.03737  5.91321  4.50900    249 - -
          2.68618  4.42225  2.77519  2.73123  3.46354  2.40513  3.72494  3.29354  2.67741  2.69355  4.24690  2.90346  2.73739  3.18146  2.89801  2.37887  2.77519  2.98518  4.58477  3.61503
          0.07822  5.25475  2.65901  0.61958  0.77255  0.64557  0.74310
    112   2.61630  4.71014  3.73472  3.04684  2.53652  3.46029  3.81387  2.86421  2.84712  2.58213  3.15031  3.22834  3.57041  3.43580  2.28814  2.99915  3.00862  2.22687  3.10022  3.61551    250 - -
          2.68618  4.42225  2.77519  2.73123  3.46354  2.40513  3.72494  3.29354  2.67741  2.69355  4.24690  2.90346  2.73739  3.18146  2.89801  2.37887  2.77519  2.98518  4.58477  3.61503
          0.00833  5.18799  5.91034  0.61958  0.77255  0.41056  1.08849
    113   2.62872  4.47701  3.07304  2.05568  2.57635  2.63330  3.94412  3.42900  2.69278  2.84290  3.11463  3.12547  3.57432  2.86383  3.03982  2.85803  2.92419  3.09004  5.21097  3.40336    251 - -
          2.68618  4.42225  2.77519  2.73123  3.46354  2.40513  3.72494  3.29354  2.67741  2.69355  4.24690  2.90346  2.73739  3.18146  2.89801  2.37887  2.77519  2.98518  4.58477  3.61503
          0.00759  5.28113  6.00348  0.61958  0.77255  0.57761  0.82380
    114   2.81872  4.95856  3.47740  3.07192  3.70931  1.31038  4.07894  3.44240  2.99168  3.18804  4.04950  3.54639  4.31138  3.29334  3.04216  3.03970  2.66804  3.25449  5.21823  2.15673    252 - -
          2.68618  4.42225  2.77519  2.73123  3.46354  2.40513  3.72494  3.29354  2.67741  2.69355  4.24690  2.90346  2.73739  3.18146  2.89801  2.37887  2.77519  2.98518  4.58477  3.61503
          0.00759  5.28113  6.00348  0.61958  0.77255  0.55533  0.85304
    115   2.86183  5.47624  1.45540  2.45073  4.19277  3.31835  3.81517  3.68429  2.71443  3.72376  4.11692  2.60598  2.80279  2.79170  2.96410  2.75631  3.11661  3.37008  5.29082  3.94682    253 - -
          2.68618  4.42225  2.77519  2.73123  3.46354  2.40513  3.72494  3.29354  2.67741  2.69355  4.24690  2.90346  2.73739  3.18146  2.89801  2.37887  2.77519  2.98518  4.58477  3.61503
          0.00961  5.28484  5.40559  0.61958  0.77255  0.56488  0.84032
    116   2.34157  4.58689  4.18967  3.57397  3.07430  2.62441  3.62328  2.72424  3.22444  2.08762  3.48286  4.00882  4.20261  3.59060  3.39696  3.38376  1.82052  2.27613  4.57005  3.17246    254 - -
          2.68618  4.42225  2.77519  2.73123  3.46354  2.40513  3.72494  3.29354  2.67741  2.69355  4.24690  2.90346  2.73739  3.18146  2.89801  2.37887  2.77519  2.98518  4.58477  3.61503
          0.00757  5.28280  6.00515  0.61958  0.77255  0.44629  1.02164
    117   2.70560  4.47592  4.48126  3.98926  2.35490  4.09523  4.00404  1.98052  4.05701  2.04838  2.73184  3.46599  3.49502  4.04113  3.48009  3.36070  2.99532  2.01037  5.09435  2.55048    255 - -
          2.68618  4.42225  2.77519  2.73123  3.46354  2.40513  3.72494  3.29354  2.67741  2.69355  4.24690  2.90346  2.73739  3.18146  2.89801  2.37887  2.77519  2.98518  4.58477  3.61503
          0.00741  5.30457  6.02692  0.61958  0.77255  0.48105  0.96268
    118   2.98076  4.30436  4.96166  4.35126  3.35493  4.08958  4.45974  2.63867  3.92762  1.07325  2.85895  4.37027  3.97018  4.29697  3.82177  3.39505  2.17167  2.18741  4.46519  3.72984    256 - -
          2.68618  4.42225  2.77519  2.73123  3.46354  2.40513  3.72494  3.29354  2.67741  2.69355  4.24690  2.90346  2.73739  3.18146  2.89801  2.37887  2.77519  2.98518  4.58477  3.61503
          0.00739  5.30656  6.02891  0.61958  0.77255  0.48576  0.95510
    119   2.43934  4.33792  4.89551  4.28932  3.44452  4.01493  4.54985  1.88993  4.10386  2.38447  3.39591  4.28692  4.20316  4.16722  3.49306  3.17671  2.41812  1.26685  5.08688  3.45948    257 - -
          2.68618  4.42225  2.77519  2.73123  3.46354  2.40513  3.72494  3.29354  2.67741  2.69355  4.24690  2.90346  2.73739  3.18146  2.89801  2.37887  2.77519  2.98518  4.58477  3.61503
          0.00739  5.30656  6.02891  0.61958  0.77255  0.48576  0.95510
    120   2.85582  5.19060  3.87180  3.45739  5.00877  3.82003  4.64477  4.24809  3.50034  3.84361  4.86405  0.59936  3.65715  3.82949  3.91472  3.09613  2.50846  3.87035  6.28228  4.99317    258 - -
          2.68618  4.42225  2.77519  2.73123  3.46354  2.40513  3.72494  3.29354  2.67741  2.69355  4.24690  2.90346  2.73739  3.18146  2.89801  2.37887  2.77519  2.98518  4.58477  3.61503
          0.01511  5.30656  4.60162  0.61958  0.77255  0.48576  0.95510
    121   2.65673  4.89929  3.07990  2.85703  4.00766  1.05058  4.11049  3.35041  2.89345  3.17608  4.16179  3.32005  4.28237  3.29889  3.24622  3.10746  3.10153  2.96955  5.61009  4.11124    259 - -
          2.68618  4.42225  2.77519  2.73123  3.46354  2.40513  3.72494  3.29354  2.67741  2.69355  4.24690  2.90346  2.73739  3.18146  2.89801  2.37887  2.77519  2.98518  4.58477  3.61503
          0.00745  5.29890  6.02125  0.61958  0.77255  0.46816  0.98391
    122   2.08729  5.24083  3.22320  2.66246  4.81934  3.45014  3.91180  3.81268  2.04528  3.63824  4.53399  2.52909  4.18793  2.35941  1.96911  2.96653  2.83268  2.99030  5.93110  3.88443    260 - -
          2.68618  4.42225  2.77519  2.73123  3.46354  2.40513  3.72494  3.29354  2.67741  2.69355  4.24690  2.90346  2.73739  3.18146  2.89801  2.37887  2.77519  2.98518  4.58477  3.61503
          0.01072  5.30656  5.16671  0.61958  0.77255  0.48576  0.95510
    123   2.53389  4.65019  3.86293  3.22520  3.58719  2.90545  4.23160  2.15392  3.43682  2.42929  3.56335  3.81723  2.98150  3.62111  3.20458  2.77662  2.54182  1.86057  4.19693  3.29313    261 - -
          2.68618  4.42225  2.77519  2.73123  3.46354  2.40513  3.72494  3.29354  2.67741  2.69355  4.24690  2.90346  2.73739  3.18146  2.89801  2.37887  2.77519  2.98518  4.58477  3.61503
          0.00742  5.30326  6.02561  0.61958  0.77255  0.47800  0.96765
    124   2.50212  5.41030  3.16594  2.64293  4.42425  3.13378  3.72958  3.80091  2.59368  2.76854  4.33949  2.44906  2.90622  2.43875  2.57624  2.83130  3.18312  3.34085  2.70412  3.20041    262 - -
          2.68551  4.42276  2.77437  2.73136  3.46396  2.40524  3.72476  3.29330  2.67786  2.69379  4.24717  2.90379  2.73646  3.18165  2.89831  2.37908  2.77524  2.98517  4.58528  3.61546
          0.41554  1.08587  6.02891  0.98319  0.46859  0.48576  0.95510
    125   2.49124  5.44762  3.02942  2.20311  4.41876  3.80340  3.99430  4.11517  2.67799  3.66499  4.49691  3.25682  1.29124  2.92543  3.12064  2.70170  2.82454  3.65504  5.55943  4.40657    266 - -
          2.68618  4.42225  2.77519  2.73123  3.46354  2.40513  3.72494  3.29354  2.67741  2.69355  4.24690  2.90346  2.73739  3.18146  2.89801  2.37887  2.77519  2.98518  4.58477  3.61503
          0.00739  5.30656  6.02891  0.61958  0.77255  0.48576  0.95510
    126   2.86615  5.40094  3.17831  2.50492  3.98231  3.67161  3.69019  3.55174  2.56467  3.45598  4.45497  2.86482  3.35301  2.48173  2.67237  2.70329  2.18465  2.23353  5.86448  2.76083    267 - -
          2.68618  4.42225  2.77519  2.73123  3.46354  2.40513  3.72494  3.29354  2.67741  2.69355  4.24690  2.90346  2.73739  3.18146  2.89801  2.37887  2.77519  2.98518  4.58477  3.61503
          0.00739  5.30656  6.02891  0.61958  0.77255  0.48576  0.95510
    127   2.73827  4.03000  4.97735  4.06704  2.27395  4.23395  2.88194  1.96302  3.73168  1.51484  3.17380  4.37741  4.59822  3.74542  3.85356  3.48673  3.22912  2.18173  4.83968  3.33495    268 - -
          2.68618  4.42225  2.77519  2.73123  3.46354  2.40513  3.72494  3.29354  2.67741  2.69355  4.24690  2.90346  2.73739  3.18146  2.89801  2.37887  2.77519  2.98518  4.58477  3.61503
          0.00739  5.30656  6.02891  0.61958  0.77255  0.48576  0.95510
    128   2.56828  5.52627  2.36561  2.00985  4.87204  3.64609  3.76177  3.96524  2.23102  3.69565  4.56675  2.66858  3.54816  2.67337  2.52960  2.44392  2.41645  3.30295  5.95854  4.54716    269 - -
          2.68618  4.42225  2.77519  2.73123  3.46354  2.40513  3.72494  3.29354  2.67741  2.69355  4.24690  2.90346  2.73739  3.18146  2.89801  2.37887  2.77519  2.98518  4.58477  3.61503
          0.02704  5.30656  3.82965  0.61958  0.77255  0.48576  0.95510
    129   1.75814  4.46106  4.90308  4.29693  3.55742  3.99117  4.42605  2.52688  4.10963  2.27458  2.78360  4.34257  4.25999  4.26539  4.16348  3.41879  3.13447  1.15845  5.08480  3.81851    270 - -
          2.68618  4.42225  2.77519  2.73123  3.46354  2.40513  3.72494  3.29354  2.67741  2.69355  4.24690  2.90346  2.73739  3.18146  2.89801  2.37887  2.77519  2.98518  4.58477  3.61503
          0.00754  5.28706  6.00941  0.61958  0.77255  0.55713  0.85062
    130   2.48608  5.51593  2.73486  2.11351  4.33885  3.56727  3.84409  4.24347  2.16110  3.82134  4.44614  3.05830  2.25092  2.48117  2.29770  2.85736  2.63305  3.80933  5.94841  4.53728    271 - -
          2.68618  4.42225  2.77519  2.73123  3.46354  2.40513  3.72494  3.29354  2.67741  2.69355  4.24690  2.90346  2.73739  3.18146  2.89801  2.37887  2.77519  2.98518  4.58477  3.61503
          0.00754  5.28706  6.00941  0.61958  0.77255  0.55713  0.85062
    131   2.14524  5.48153  3.26976  2.45447  4.71858  3.34463  3.97426  4.28770  2.22361  3.78047  3.52366  3.19142  1.90154  2.90947  2.24107  2.82190  2.64416  3.80719  5.92286  4.52130    272 - -
          2.68618  4.42225  2.77519  2.73123  3.46354  2.40513  3.72494  3.29354  2.67741  2.69355  4.24690  2.90346  2.73739  3.18146  2.89801  2.37887  2.77519  2.98518  4.58477  3.61503
          0.01053  5.28706  5.21746  0.61958  0.77255  0.44359  1.02647
    132   2.69258  5.49819  3.00571  2.63902  4.63519  1.32247  3.88358  4.31011  2.63561  3.72210  4.54191  2.87704  4.09669  2.72701  2.40817  2.82937  2.78911  3.61765  5.93759  4.40379    273 - -
          2.68618  4.42225  2.77519  2.73123  3.46354  2.40513  3.72494  3.29354  2.67741  2.69355  4.24690  2.90346  2.73739  3.18146  2.89801  2.37887  2.77519  2.98518  4.58477  3.61503
          0.03358  5.30365  3.57388  0.61958  0.77255  0.47890  0.96618
    133   2.84654  5.20585  2.80855  1.78427  4.68832  2.76749  3.96345  4.24407  2.09327  3.54499  4.21233  3.11044  4.11390  2.30667  2.58395  2.76089  2.89238  3.58672  3.15125  4.53129    274 - -
          2.68618  4.42225  2.77519  2.73123  3.46354  2.40513  3.72494  3.29354  2.67741  2.69355  4.24690  2.90346  2.73739  3.18146  2.89801  2.37887  2.77519  2.98518  4.58477  3.61503
          0.00759  5.28067  6.00302  0.61958  0.77255  0.43149  1.04852
    134   2.92843  4.72512  3.69172  3.39394  3.81599  4.04941  4.19943  2.64344  2.72033  2.10629  3.76566  3.61415  3.82686  3.67498  2.01640  3.30008  2.71535  2.05185  5.01676  2.32796    275 - -
          2.68618  4.42225  2.77519  2.73123  3.46354  2.40513  3.72494  3.29354  2.67741  2.69355  4.24690  2.90346  2.73739  3.18146  2.89801  2.37887  2.77519  2.98518  4.58477  3.61503
          0.04246  5.30656  3.30746  0.61958  0.77255  0.48576  0.95510
    135   2.88578  4.79696  3.84676  3.01577  3.94150  3.90337  4.23786  2.57840  3.15583  2.39869  3.83874  3.70169  4.37437  2.67511  1.54319  3.23435  3.04311  1.88751  5.37197  4.03712    276 - -
          2.68618  4.42225  2.77519  2.73123  3.46354  2.40513  3.72494  3.29354  2.67741  2.69355  4.24690  2.90346  2.73739  3.18146  2.89801  2.37887  2.77519  2.98518  4.58477  3.61503
          0.42529  5.27176  1.07503  0.61958  0.77255  0.60890  0.78515
    136   3.17590  5.39159  3.83596  3.13437  4.72202  4.02955  3.10278  4.09233  2.26865  2.93540  4.22462  3.55853  4.38016  3.14760  0.82255  3.32958  3.48208  3.67985  5.73744  4.52688    277 - -
          2.68618  4.42225  2.77519  2.73123  3.46354  2.40513  3.72494  3.29354  2.67741  2.69355  4.24690  2.90346  2.73739  3.18146  2.89801  2.37887  2.77519  2.98518  4.58477  3.61503
          0.01160  4.85807  5.58042  0.61958  0.77255  0.17597  1.82416
    137   3.65267  5.05170  5.69790  5.09055  1.86660  4.96226  5.24885  2.37252  4.89609  0.82698  3.42058  5.12500  5.20995  4.91189  4.86710  4.29476  3.95568  2.62233  2.56805  4.42933    278 - -
          2.68618  4.42225  2.77519  2.73123  3.46354  2.40513  3.72494  3.29354  2.67741  2.69355  4.24690  2.90346  2.73739  3.18146  2.89801  2.37887  2.77519  2.98518  4.58477  3.61503
          0.00739  5.30656  6.02891  0.61958  0.77255  0.48576  0.95510
    138   4.18124  6.15139  4.85012  3.92031  5.32770  4.71382  3.33991  4.96853  2.53520  4.17225  5.23285  4.21749  5.01889  3.43152  0.38250  4.16395  4.27068  4.68906  6.16407  3.81451    279 - -
          2.68618  4.42225  2.77519  2.73123  3.46354  2.40513  3.72494  3.29354  2.67741  2.69355  4.24690  2.90346  2.73739  3.18146  2.89801  2.37887  2.77519  2.98518  4.58477  3.61503
          0.00739  5.30656  6.02891  0.61958  0.77255  0.48576  0.95510
    139   3.56569  4.97370  5.63955  5.03534  2.37643  4.89769  5.22734  1.41158  4.84250  1.09002  3.37063  5.06603  5.16525  4.88858  4.82602  4.23018  3.88097  1.93262  4.86334  4.45954    280 - -
          2.68618  4.42225  2.77519  2.73123  3.46354  2.40513  3.72494  3.29354  2.67741  2.69355  4.24690  2.90346  2.73739  3.18146  2.89801  2.37887  2.77519  2.98518  4.58477  3.61503
          0.00739  5.30656  6.02891  0.61958  0.77255  0.48576  0.95510
    140   2.87616  4.46600  5.04226  4.42839  3.55060  4.26119  4.38677  1.76092  4.21661  1.13666  3.53227  4.41934  4.62299  4.34914  4.22925  3.57251  3.05269  1.92683  3.85089  3.49942    281 - -
          2.68618  4.42225  2.77519  2.73123  3.46354  2.40513  3.72494  3.29354  2.67741  2.69355  4.24690  2.90346  2.73739  3.18146  2.89801  2.37887  2.77519  2.98518  4.58477  3.61503
          0.00739  5.30656  6.02891  0.61958  0.77255  0.48576  0.95510
    141   3.08775  5.26570  2.97570  3.00096  4.97730  3.84087  3.90643  4.26041  3.20641  4.01481  4.82380  0.59110  4.45063  3.51575  3.68510  3.29533  3.57674  3.72933  6.20336  4.82367    282 - -
          2.68618  4.42225  2.77519  2.73123  3.46354  2.40513  3.72494  3.29354  2.67741  2.69355  4.24690  2.90346  2.73739  3.18146  2.89801  2.37887  2.77519  2.98518  4.58477  3.61503
          0.00739  5.30656  6.02891  0.61958  0.77255  0.48576  0.95510
    142   1.26329  4.86595  4.05491  3.51032  4.19896  1.59090  4.46707  3.29914  3.46958  3.04695  4.15115  3.86837  3.49511  3.77222  3.82862  2.96876  2.57462  2.79272  5.62321  4.38815    283 - -
          2.68618  4.42225  2.77519  2.73123  3.46354  2.40513  3.72494  3.29354  2.67741  2.69355  4.24690  2.90346  2.73739  3.18146  2.89801  2.37887  2.77519  2.98518  4.58477  3.61503
          0.06359  5.30656  2.87086  0.61958  0.77255  0.48576  0.95510
    143   1.85363  2.47450  2.70418  3.15807  4.80903  2.59615  4.38673  4.24411  3.21389  3.84421  4.63994  3.63891  4.34913  3.54723  3.65925  1.22926  3.00328  3.81375  6.06421  4.75035    284 - -
          2.68613  4.42227  2.77522  2.73125  3.46356  2.40515  3.72497  3.29356  2.67743  2.69357  4.24692  2.90332  2.73742  3.18149  2.89803  2.37884  2.77514  2.98521  4.58479  3.61505
          0.01678  4.26227  5.97314  0.95077  0.48848  0.38356  1.14392
    144   2.38130  5.42340  3.02782  2.75550  4.73055  2.77867  4.00266  3.74031  2.73440  3.46165  4.47833  1.50061  3.20638  3.11420  3.20149  2.17614  2.82520  3.34499  5.88465  4.50002    290 - -
          2.68618  4.42225  2.77519  2.73123  3.46354  2.40513  3.72494  3.29354  2.67741  2.69355  4.24690  2.90346  2.73739  3.18146  2.89801  2.37887  2.77519  2.98518  4.58477  3.61503
          0.00739  5.30656  6.02891  0.61958  0.77255  0.48576  0.95510
    145   1.47116  5.25722  2.64150  2.76428  3.72380  3.49034  3.58092  3.70035  2.84038  3.29457  3.84159  3.18165  4.14799  3.19162  2.91656  2.27740  2.46842  3.35228  5.27316  3.62036    291 - -
          2.68618  4.42225  2.77519  2.73123  3.46354  2.40513  3.72494  3.29354  2.67741  2.69355  4.24690  2.90346  2.73739  3.18146  2.89801  2.37887  2.77519  2.98518  4.58477  3.61503
          0.00739  5.30656  6.02891  0.61958  0.77255  0.48576  0.95510
    146   2.93547  4.35014  3.76278  2.89165  3.76262  3.99754  4.24152  3.19475  3.22437  2.77888  3.49250  3.62656  4.37878  3.53710  1.15715  3.05170  2.21433  2.90457  4.94216  3.68951    292 - -
          2.68618  4.42225  2.77519  2.73123  3.46354  2.40513  3.72494  3.29354  2.67741  2.69355  4.24690  2.90346  2.73739  3.18146  2.89801  2.37887  2.77519  2.98518  4.58477  3.61503
          0.00739  5.30656  6.02891  0.61958  0.77255  0.48576  0.95510
    147   2.40869  4.88386  3.57892  2.95510  2.37398  3.53594  4.12713  2.67418  3.15461  2.87934  3.93214  3.08004  3.32260  3.37413  3.08710  2.20468  2.43832  2.73830  5.44841  2.68408    293 - -
          2.68618  4.42225  2.77519  2.73123  3.46354  2.40513  3.72494  3.29354  2.67741  2.69355  4.24690  2.90346  2.73739  3.18146  2.89801  2.37887  2.77519  2.98518  4.58477  3.61503
          0.00739  5.30656  6.02891  0.61958  0.77255  0.48576  0.95510
    148   3.07623  4.47106  4.91129  4.30516  1.81748  4.23042  3.26928  2.68386  4.01027  1.78630  3.40460  4.34878  4.59521  3.77860  3.68380  3.47741  3.18493  2.65689  4.10366  1.66401    294 - -
          2.68618  4.42225  2.77519  2.73123  3.46354  2.40513  3.72494  3.29354  2.67741  2.69355  4.24690  2.90346  2.73739  3.18146  2.89801  2.37887  2.77519  2.98518  4.58477  3.61503
          0.00739  5.30656  6.02891  0.61958  0.77255  0.48576  0.95510
    149   2.89361  5.37735  2.70785  2.48719  4.05100  3.65644  3.25923  4.21499  2.42167  3.49225  4.21594  2.10289  3.83083  2.83074  1.81809  2.77351  2.51998  3.71502  4.08754  4.54143    295 - -
          2.68618  4.42225  2.77519  2.73123  3.46354  2.40513  3.72494  3.29354  2.67741  2.69355  4.24690  2.90346  2.73739  3.18146  2.89801  2.37887  2.77519  2.98518  4.58477  3.61503
          0.00739  5.30656  6.02891  0.61958  0.77255  0.48576  0.95510
    150   3.17561  4.61739  5.21215  4.60160  2.72161  4.44487  4.77941  1.97855  4.39580  0.93394  3.44954  4.60394  3.70363  4.51081  4.40441  3.76103  3.42231  2.03105  5.23902  3.84717    296 - -
          2.68618  4.42225  2.77519  2.73123  3.46354  2.40513  3.72494  3.29354  2.67741  2.69355  4.24690  2.90346  2.73739  3.18146  2.89801  2.37887  2.77519  2.98518  4.58477  3.61503
          0.00739  5.30656  6.02891  0.61958  0.77255  0.48576  0.95510
    151   1.77968  5.11987  2.82436  2.64849  3.71843  2.81068  3.11775  4.32517  2.18790  3.68302  4.54970  2.77006  4.18443  2.92117  2.70528  2.36552  2.76855  3.39252  5.94429  4.27415    297 - -
          2.68618  4.42225  2.77519  2.73123  3.46354  2.40513  3.72494  3.29354  2.67741  2.69355  4.24690  2.90346  2.73739  3.18146  2.89801  2.37887  2.77519  2.98518  4.58477  3.61503
          0.00739  5.30656  6.02891  0.61958  0.77255  0.48576  0.95510
    152   2.63902  4.19673  5.07972  4.46774  2.03716  4.29911  4.63681  2.29632  4.25743  1.18174  3.44991  4.45888  4.65858  4.38973  4.26998  3.51652  2.77030  2.08776  5.12761  3.95289    298 - -
          2.68618  4.42225  2.77519  2.73123  3.46354  2.40513  3.72494  3.29354  2.67741  2.69355  4.24690  2.90346  2.73739  3.18146  2.89801  2.37887  2.77519  2.98518  4.58477  3.61503
          0.00739  5.30656  6.02891  0.61958  0.77255  0.48576  0.95510
    153   2.53789  5.52347  2.34768  2.09302  4.86794  2.63934  3.29232  4.22971  2.64468  3.39952  4.56429  3.12042  2.84126  2.71331  3.10981  1.91126  2.93938  3.74534  5.95650  4.42379    299 - -
          2.68618  4.42225  2.77519  2.73123  3.46354  2.40513  3.72494  3.29354  2.67741  2.69355  4.24690  2.90346  2.73739  3.18146  2.89801  2.37887  2.77519  2.98518  4.58477  3.61503
          0.05909  5.30656  2.94850  0.61958  0.77255  0.48576  0.95510
    154   2.97813  5.51648  1.98572  2.61836  4.85837  1.62453  3.69481  4.34356  2.63682  3.76467  4.55881  2.23782  3.74058  2.86683  2.94684  2.71986  3.11519  3.74319  5.95031  4.53879    300 - -
          2.68618  4.42225  2.77519  2.73123  3.46354  2.40513  3.72494  3.29354  2.67741  2.69355  4.24690  2.90346  2.73739  3.18146  2.89801  2.37887  2.77519  2.98518  4.58477  3.61503
          0.46017  5.25525  1.01169  0.61958  0.77255  0.50154  0.93039
    155   2.80343  5.32501  2.55264  2.31900  4.66581  2.11516  2.57338  4.14934  2.35802  3.62845  4.36709  2.56840  3.30912  2.70526  3.01489  2.66209  2.96069  3.57840  5.75994  3.88322    301 - -
          2.68618  4.42225  2.77519  2.73123  3.46354  2.40513  3.72494  3.29354  2.67741  2.69355  4.24690  2.90346  2.73739  3.18146  2.89801  2.37887  2.77519  2.98518  4.58477  3.61503
          0.07833  4.85204  2.69526  0.61958  0.77255  1.22689  0.34701
    156   2.54113  5.23348  2.69501  2.49362  4.54489  3.22387  3.55526  3.63847  2.47763  3.17711  3.30554  2.87891  2.85507  2.74928  1.92744  2.64517  2.95157  3.36309  5.68683  4.29719    302 - -
          2.68616  4.42246  2.77520  2.73115  3.46375  2.40463  3.72516  3.29370  2.67762  2.69373  4.24711  2.90353  2.73737  3.18146  2.89796  2.37875  2.77529  2.98520  4.58498  3.61513
          1.16431  1.71258  0.67833  1.16568  0.37355  0.23207  1.57452
    157   2.35946  4.69367  3.13869  2.61088  3.97948  3.12462  2.20653  3.31870  2.52465  2.56081  3.77256  3.17792  3.20646  2.65276  3.04971  2.82441  2.85746  2.95534  5.51449  4.04752    313 - -
          2.68618  4.42225  2.77519  2.73123  3.46354  2.40513  3.72494  3.29354  2.67741  2.69355  4.24690  2.90346  2.73739  3.18146  2.89801  2.37887  2.77519  2.98518  4.58477  3.61503
          0.07963  4.88535  2.67380  0.61958  0.77255  0.34335  1.23578
    158   2.69715  5.46351  2.65854  2.12571  4.80787  3.62617  3.91568  4.13074  2.28104  3.71489  4.50437  3.13855  2.24742  2.43182  2.64326  2.30294  2.62635  3.31747  5.89661  4.48609    314 - -
          2.68618  4.42225  2.77519  2.73123  3.46354  2.40513  3.72494  3.29354  2.67741  2.69355  4.24690  2.90346  2.73739  3.18146  2.89801  2.37887  2.77519  2.98518  4.58477  3.61503
          0.00839  5.18079  5.90313  0.61958  0.77255  0.30768  1.32860
    159   2.38438  4.26426  5.01707  4.40303  1.59552  3.11042  4.57205  2.59233  4.19207  1.66687  2.40628  4.39577  4.03648  4.32675  4.20686  3.55001  3.28698  2.48454  4.29998  3.60657    315 - -
          2.68618  4.42225  2.77519  2.73123  3.46354  2.40513  3.72494  3.29354  2.67741  2.69355  4.24690  2.90346  2.73739  3.18146  2.89801  2.37887  2.77519  2.98518  4.58477  3.61503
          0.00739  5.30656  6.02891  0.61958  0.77255  0.48576  0.95510
    160   2.81182  5.32405  3.24186  2.58559  4.29713  3.56924  3.20532  3.31726  2.28257  3.35670  4.24294  3.01341  4.22160  2.76247  2.63914  2.89841  2.18074  2.90369  3.16282  2.43937    316 - -
          2.68618  4.42225  2.77519  2.73123  3.46354  2.40513  3.72494  3.29354  2.67741  2.69355  4.24690  2.90346  2.73739  3.18146  2.89801  2.37887  2.77519  2.98518  4.58477  3.61503
          0.00739  5.30656  6.02891  0.61958  0.77255  0.48576  0.95510
    161   2.99647  4.14567  4.73854  3.80799  3.59260  4.20173  3.91824  2.27229  3.98475  1.80388  3.57274  4.26188  4.56853  2.05890  3.90691  3.49915  3.24467  1.37060  4.75354  3.79284    317 - -
          2.68618  4.42225  2.77519  2.73123  3.46354  2.40513  3.72494  3.29354  2.67741  2.69355  4.24690  2.90346  2.73739  3.18146  2.89801  2.37887  2.77519  2.98518  4.58477  3.61503
          0.00739  5.30656  6.02891  0.61958  0.77255  0.48576  0.95510
    162   3.19672  4.64172  5.25345  4.65901  3.62188  4.52397  4.89065  1.00249  4.46904  2.47350  3.57962  4.67588  4.86950  4.61646  4.50212  3.84616  2.42664  1.58538  5.37696  3.17222    318 - -
          2.68618  4.42225  2.77519  2.73123  3.46354  2.40513  3.72494  3.29354  2.67741  2.69355  4.24690  2.90346  2.73739  3.18146  2.89801  2.37887  2.77519  2.98518  4.58477  3.61503
          0.00739  5.30656  6.02891  0.61958  0.77255  0.48576  0.95510
    163   1.13067  5.26221  3.51242  3.08872  4.75707  1.66874  2.76040  4.18707  3.11516  3.78230  4.58700  3.56836  4.36417  3.41451  3.39244  2.74380  3.30450  3.75010  6.00676  4.67888    319 - -
          2.68618  4.42225  2.77519  2.73123  3.46354  2.40513  3.72494  3.29354  2.67741  2.69355  4.24690  2.90346  2.73739  3.18146  2.89801  2.37887  2.77519  2.98518  4.58477  3.61503
          0.00739  5.30656  6.02891  0.61958  0.77255  0.48576  0.95510
    164   2.76880  4.84047  3.70847  3.24340  3.98973  3.18429  4.23414  2.82287  3.13773  2.61062  3.66247  3.16129  4.14129  3.38200  3.23233  1.90589  1.70051  2.32156  5.15747  3.79163    320 - -
          2.68618  4.42225  2.77519  2.73123  3.46354  2.40513  3.72494  3.29354  2.67741  2.69355  4.24690  2.90346  2.73739  3.18146  2.89801  2.37887  2.77519  2.98518  4.58477  3.61503
          0.00739  5.30656  6.02891  0.61958  0.77255  0.48576  0.95510
    165   4.24785  7.00370  0.24948  2.77242  6.33728  3.87751  4.94148  6.01130  4.25061  5.41833  6.41046  3.64646  4.91997  4.15061  5.05463  4.04011  4.60217  5.48936  7.49671  5.86014    321 - -
          2.68618  4.42225  2.77519  2.73123  3.46354  2.40513  3.72494  3.29354  2.67741  2.69355  4.24690  2.90346  2.73739  3.18146  2.89801  2.37887  2.77519  2.98518  4.58477  3.61503
          0.02136  5.30656  4.12417  0.61958  0.77255  0.48576  0.95510
    166   2.77582  4.85541  3.59384  3.31777  4.67514  0.63060  4.16693  4.08374  3.36883  3.47487  4.56712  3.28978  4.44555  3.60995  3.78491  3.12048  3.42231  3.52260  6.00199  4.71746    322 - -
          2.68618  4.42249  2.77544  2.73147  3.46363  2.40511  3.72478  3.29339  2.67759  2.69348  4.24688  2.90327  2.73713  3.18147  2.89790  2.37900  2.77517  2.98521  4.58501  3.61442
          0.07383  2.85575  4.29346  1.81307  0.17811  0.45491  1.00651
    167   2.80322  5.29283  3.37233  2.75996  3.44821  1.44114  3.53775  3.88907  2.81109  3.41450  3.76466  2.51957  3.81804  2.50480  3.11715  2.75157  2.98744  3.44228  5.77984  3.69780    337 - -
          2.68618  4.42225  2.77519  2.73123  3.46354  2.40513  3.72494  3.29354  2.67741  2.69355  4.24690  2.90346  2.73739  3.18146  2.89801  2.37887  2.77519  2.98518  4.58477  3.61503
          0.02234  5.29544  4.06992  0.61958  0.77255  0.46065  0.99661
    168   2.72524  4.83504  3.34727  3.05860  2.73301  3.07544  3.90999  3.22258  3.19789  1.59518  3.93380  3.36602  2.01903  3.45531  3.29309  3.11958  3.16608  3.11603  5.07510  3.29525    338 - -
          2.68618  4.42225  2.77519  2.73123  3.46354  2.40513  3.72494  3.29354  2.67741  2.69355  4.24690  2.90346  2.73739  3.18146  2.89801  2.37887  2.77519  2.98518  4.58477  3.61503
          0.00750  5.29197  6.01432  0.61958  0.77255  0.53976  0.87440
    169   3.00202  3.88992  4.98899  4.37646  3.26074  4.23012  4.56174  2.14841  4.17011  1.13775  3.39141  4.37949  3.86366  3.74938  3.76872  3.47860  3.09291  1.74192  5.06708  3.77365    339 - -
          2.68618  4.42225  2.77519  2.73123  3.46354  2.40513  3.72494  3.29354  2.67741  2.69355  4.24690  2.90346  2.73739  3.18146  2.89801  2.37887  2.77519  2.98518  4.58477  3.61503
          0.00750  5.29197  6.01432  0.61958  0.77255  0.53976  0.87440
    170   2.14317  5.51636  2.75192  1.79326  4.70055  3.57139  3.50626  3.95745  2.50411  3.54002  4.55715  2.56861  2.63091  2.64988  2.96837  2.66525  2.94318  3.39931  5.94935  4.43042    340 - -
          2.68618  4.42225  2.77519  2.73123  3.46354  2.40513  3.72494  3.29354  2.67741  2.69355  4.24690  2.90346  2.73739  3.18146  2.89801  2.37887  2.77519  2.98518  4.58477  3.61503
          0.17228  5.29197  1.87586  0.61958  0.77255  0.53976  0.87440
    171   2.35860  5.44271  2.69918  1.97841  4.78835  3.45634  3.37682  4.22571  1.85187  3.35822  4.42165  2.89891  3.13822  2.72292  2.57505  2.70702  2.83176  3.77561  5.87504  4.46376    341 - -
          2.68618  4.42225  2.77519  2.73123  3.46354  2.40513  3.72494  3.29354  2.67741  2.69355  4.24690  2.90346  2.73739  3.18146  2.89801  2.37887  2.77519  2.98518  4.58477  3.61503
          0.04816  5.12854  3.19197  0.61958  0.77255  0.97115  0.47586
    172   2.68818  5.10805  3.08891  2.72092  3.89627  3.70148  3.58077  3.72066  2.76933  3.27095  4.18215  3.29451  1.22752  3.11924  2.84001  2.83160  3.03206  3.11701  5.61551  4.28451    342 - -
          2.68618  4.42225  2.77519  2.73123  3.46354  2.40513  3.72494  3.29354  2.67741  2.69355  4.24690  2.90346  2.73739  3.18146  2.89801  2.37887  2.77519  2.98518  4.58477  3.61503
          0.00919  5.08957  5.81192  0.61958  0.77255  1.04386  0.43401
    173   2.78668  4.62750  3.80262  3.03798  3.49076  3.63791  3.92174  2.69750  2.96732  2.38835  3.36698  3.68854  3.27182  2.80182  3.02124  3.12857  2.98490  1.47295  5.21340  3.34475    343 - -
          2.68618  4.42225  2.77519  2.73123  3.46354  2.40513  3.72494  3.29354  2.67741  2.69355  4.24690  2.90346  2.73739  3.18146  2.89801  2.37887  2.77519  2.98518  4.58477  3.61503
          0.00919  5.08957  5.81192  0.61958  0.77255  0.26834  1.44666
    174   2.51791  5.50723  2.82311  1.98866  4.48215  3.72532  3.77478  4.26866  2.28103  3.25693  4.54948  3.25686  1.99578  2.72744  2.67336  2.66893  2.84562  3.38681  5.36486  3.87969    344 - -
          2.68618  4.42225  2.77519  2.73123  3.46354  2.40513  3.72494  3.29354  2.67741  2.69355  4.24690  2.90346  2.73739  3.18146  2.89801  2.37887  2.77519  2.98518  4.58477  3.61503
          0.03845  5.29963  3.41952  0.61958  0.77255  0.51189  0.91470
    175   2.77078  4.63953  3.37056  3.30661  3.62305  3.73748  3.57059  2.35735  3.40947  1.75352  3.37878  3.80313  3.68370  3.35077  3.10978  3.09377  2.62929  1.81420  4.18950  3.89236    345 - -
          2.68618  4.42225  2.77519  2.73123  3.46354  2.40513  3.72494  3.29354  2.67741  2.69355  4.24690  2.90346  2.73739  3.18146  2.89801  2.37887  2.77519  2.98518  4.58477  3.61503
          0.00972  5.26885  5.39910  0.61958  0.77255  0.41098  1.08768
    176   2.70149  5.51909  2.54864  2.26162  4.06195  3.32442  3.81637  4.34673  2.34383  3.73849  4.56028  2.84706  3.38731  2.53704  2.72795  2.36160  2.09464  3.05191  4.09940  4.54323    346 - -
          2.68618  4.42225  2.77519  2.73123  3.46354  2.40513  3.72494  3.29354  2.67741  2.69355  4.24690  2.90346  2.73739  3.18146  2.89801  2.37887  2.77519  2.98518  4.58477  3.61503
          0.01347  5.30461  4.77785  0.61958  0.77255  0.48115  0.96253
    177   2.60204  5.52122  2.54991  1.96889  4.86604  2.69498  3.76417  4.35184  2.52619  3.48989  4.56195  3.00530  3.53331  2.66613  2.72501  2.25734  2.44986  2.91910  5.95405  4.54324    347 - -
          2.68597  4.42269  2.77452  2.73110  3.46396  2.40530  3.72510  3.29378  2.67767  2.69346  4.24734  2.90371  2.73756  3.18169  2.89750  2.37880  2.77524  2.98483  4.58521  3.61537
          0.57516  0.83250  6.02290  0.61868  0.77361  0.47183  0.97779
    178   3.05665  4.45092  5.03472  4.41989  2.38054  4.24462  4.18101  2.03901  4.20574  1.14821  3.42582  3.80616  4.60797  4.33730  4.21529  3.55580  3.19325  2.05723  4.18889  3.40483    354 - -
          2.68618  4.42225  2.77519  2.73123  3.46354  2.40513  3.72494  3.29354  2.67741  2.69355  4.24690  2.90346  2.73739  3.18146  2.89801  2.37887  2.77519  2.98518  4.58477  3.61503
          0.04958  5.30656  3.13712  0.61958  0.77255  0.48576  0.95510
    179   2.76157  5.03033  3.36143  2.61503  3.93004  3.55082  3.85158  3.33574  2.87036  1.83840  3.49848  3.20790  2.72484  2.93233  2.65480  2.76530  2.68905  2.73330  4.03146  3.57523    355 - -
          2.68618  4.42225  2.77519  2.73123  3.46354  2.40513  3.72494  3.29354  2.67741  2.69355  4.24690  2.90346  2.73739  3.18146  2.89801  2.37887  2.77519  2.98518  4.58477  3.61503
          0.00771  5.26470  5.98704  0.61958  0.77255  0.40427  1.10100
    180   3.80862  5.10835  5.78158  5.18098  3.54461  5.07289  4.90149  1.39147  4.99871  0.85921  2.49990  5.23866  5.30335  5.01543  4.97756  4.41292  3.93792  2.40053  5.68309  4.60986    356 - -
          2.68618  4.42225  2.77519  2.73123  3.46354  2.40513  3.72494  3.29354  2.67741  2.69355  4.24690  2.90346  2.73739  3.18146  2.89801  2.37887  2.77519  2.98518  4.58477  3.61503
          0.00739  5.30656  6.02891  0.61958  0.77255  0.48576  0.95510
    181   1.71287  5.14870  3.37195  2.84211  4.36573  2.01776  3.98766  3.68785  2.91144  2.65061  3.93415  3.43069  3.77265  3.14896  3.32058  2.07134  2.67456  3.41628  5.66695  3.82610    357 - -
          2.68618  4.42225  2.77519  2.73123  3.46354  2.40513  3.72494  3.29354  2.67741  2.69355  4.24690  2.90346  2.73739  3.18146  2.89801  2.37887  2.77519  2.98518  4.58477  3.61503
          0.00739  5.30656  6.02891  0.61958  0.77255  0.48576  0.95510
    182   2.52833  3.73528  4.23374  3.66139  3.78108  3.96329  4.40446  2.99191  3.58364  2.83885  2.22729  3.79422  1.17386  3.61311  3.85849  3.06655  2.99861  2.82748  5.26360  4.05523    358 - -
          2.68618  4.42225  2.77519  2.73123  3.46354  2.40513  3.72494  3.29354  2.67741  2.69355  4.24690  2.90346  2.73739  3.18146  2.89801  2.37887  2.77519  2.98518  4.58477  3.61503
          0.00739  5.30656  6.02891  0.61958  0.77255  0.48576  0.95510
    183   1.29950  5.03222  5.07490  4.91310  4.69825  0.63578  5.72480  5.13595  4.94625  4.83034  5.60214  4.58849  4.68154  5.09896  5.08654  2.70119  3.68173  4.34164  7.01068  5.91235    359 - -
          2.68618  4.42225  2.77519  2.73123  3.46354  2.40513  3.72494  3.29354  2.67741  2.69355  4.24690  2.90346  2.73739  3.18146  2.89801  2.37887  2.77519  2.98518  4.58477  3.61503
          0.00739  5.30656  6.02891  0.61958  0.77255  0.48576  0.95510
    184   2.90453  5.51280  3.26570  1.05236  4.84095  3.16863  4.00579  4.31588  2.75160  3.81096  3.35579  2.88565  4.20726  2.26470  3.24192  2.79763  3.27342  3.89477  5.95572  4.12766    360 - -
          2.68618  4.42225  2.77519  2.73123  3.46354  2.40513  3.72494  3.29354  2.67741  2.69355  4.24690  2.90346  2.73739  3.18146  2.89801  2.37887  2.77519  2.98518  4.58477  3.61503
          0.00739  5.30656  6.02891  0.61958  0.77255  0.48576  0.95510
    185   5.33097  6.70178  5.92177  5.38148  6.47454  5.28628  5.82378  6.33078  4.09530  5.58247  6.66147  5.60590  5.83293  5.10754  0.07499  5.44709  5.58280  6.00379  7.06184  6.31582    361 - -
          2.68618  4.42225  2.77519  2.73123  3.46354  2.40513  3.72494  3.29354  2.67741  2.69355  4.24690  2.90346  2.73739  3.18146  2.89801  2.37887  2.77519  2.98518  4.58477  3.61503
          0.00739  5.30656  6.02891  0.61958  0.77255  0.48576  0.95510
    186   1.72131  4.09388  4.74690  4.37460  2.46779  4.01611  4.56612  2.33844  3.99997  2.14886  3.29943  4.38163  4.59927  3.75702  4.04148  3.29382  3.21994  1.96695  4.69586  2.18800    362 - -
          2.68618  4.42225  2.77519  2.73123  3.46354  2.40513  3.72494  3.29354  2.67741  2.69355  4.24690  2.90346  2.73739  3.18146  2.89801  2.37887  2.77519  2.98518  4.58477  3.61503
          0.00739  5.30656  6.02891  0.61958  0.77255  0.48576  0.95510
    187   3.12958  4.64787  1.20217  1.39391  4.98028  3.85582  4.12048  3.90789  2.90650  3.95637  4.71693  3.33089  4.29885  3.17265  3.41118  2.83098  3.25282  4.03591  6.10562  4.68990    363 - -
          2.68618  4.42225  2.77519  2.73123  3.46354  2.40513  3.72494  3.29354  2.67741  2.69355  4.24690  2.90346  2.73739  3.18146  2.89801  2.37887  2.77519  2.98518  4.58477  3.61503
          0.00739  5.30656  6.02891  0.61958  0.77255  0.48576  0.95510
    188   2.90093  4.93310  5.67487  5.10919  3.23554  4.98744  5.41380  1.50221  4.94754  1.69799  3.40118  5.15184  5.27756  5.07949  4.98375  4.33661  3.88513  1.01745  5.81353  4.65435    364 - -
          2.68618  4.42225  2.77519  2.73123  3.46354  2.40513  3.72494  3.29354  2.67741  2.69355  4.24690  2.90346  2.73739  3.18146  2.89801  2.37887  2.77519  2.98518  4.58477  3.61503
          0.00739  5.30656  6.02891  0.61958  0.77255  0.48576  0.95510
    189   2.67147  4.50790  4.11104  2.78332  3.43418  3.88156  4.23807  2.02134  3.93296  1.39114  3.23248  4.22586  4.55817  4.01261  3.50467  3.48430  3.06974  1.86831  4.83450  3.84877    365 - -
          2.68618  4.42225  2.77519  2.73123  3.46354  2.40513  3.72494  3.29354  2.67741  2.69355  4.24690  2.90346  2.73739  3.18146  2.89801  2.37887  2.77519  2.98518  4.58477  3.61503
          0.00739  5.30656  6.02891  0.61958  0.77255  0.48576  0.95510
    190   3.23454  4.77727  5.46492  4.88274  2.58462  4.43742  5.13370  1.76624  4.70170  2.20408  3.25647  4.90213  5.06344  4.84269  4.73172  4.07385  3.69750  0.84364  5.58310  4.40921    366 - -
          2.68618  4.42225  2.77519  2.73123  3.46354  2.40513  3.72494  3.29354  2.67741  2.69355  4.24690  2.90346  2.73739  3.18146  2.89801  2.37887  2.77519  2.98518  4.58477  3.61503
          0.00739  5.30656  6.02891  0.61958  0.77255  0.48576  0.95510
    191   2.90552  5.51331  1.54895  2.32733  4.85336  3.79023  3.97781  3.62075  2.26755  3.66111  4.55531  3.22496  3.97286  2.86772  2.46856  2.83558  2.22934  3.55594  5.94897  4.01748    367 - -
          2.68618  4.42225  2.77519  2.73123  3.46354  2.40513  3.72494  3.29354  2.67741  2.69355  4.24690  2.90346  2.73739  3.18146  2.89801  2.37887  2.77519  2.98518  4.58477  3.61503
          0.16574  5.30656  1.91209  0.61958  0.77255  0.48576  0.95510
    192   2.03125  4.21233  4.90023  4.28865  1.75276  3.57978  4.48337  2.43047  4.08505  1.91045  2.53894  4.29752  4.15369  4.22595  4.11153  3.46121  2.87000  2.19485  4.99217  3.81512    368 - -
          2.68618  4.42225  2.77519  2.73123  3.46354  2.40513  3.72494  3.29354  2.67741  2.69355  4.24690  2.90346  2.73739  3.18146  2.89801  2.37887  2.77519  2.98518  4.58477  3.61503
          0.01240  5.14948  5.03329  0.61958  0.77255  0.83752  0.56701
    193   2.50470  5.44883  2.97249  2.48039  4.79004  2.77057  3.85129  4.18634  2.57985  3.75249  4.49060  2.72894  2.28173  2.86396  2.54780  2.01298  2.44755  3.71722  5.88387  4.47523    369 - -
          2.68618  4.42225  2.77519  2.73123  3.46354  2.40513  3.72494  3.29354  2.67741  2.69355  4.24690  2.90346  2.73739  3.18146  2.89801  2.37887  2.77519  2.98518  4.58477  3.61503
          0.18971  5.16357  1.78928  0.61958  0.77255  0.89818  0.52308
    194   2.29408  5.38302  2.24367  2.04485  4.61245  3.04374  3.60581  4.21511  2.16915  3.68851  4.42363  2.61768  3.28353  2.60145  2.88134  2.50637  3.03949  3.77395  5.81530  4.40375    370 - -
          2.68618  4.42225  2.77519  2.73123  3.46354  2.40513  3.72494  3.29354  2.67741  2.69355  4.24690  2.90346  2.73739  3.18146  2.89801  2.37887  2.77519  2.98518  4.58477  3.61503
          0.15808  4.98409  1.97059  0.61958  0.77255  1.20657  0.35556
    195   2.44260  4.67940  2.94087  2.33305  4.00186  3.40431  3.55666  3.07862  2.46962  2.98442  3.89909  3.08138  2.83347  2.84037  2.75246  2.45290  2.88627  3.31492  5.57641  2.75486    371 - -
          2.68618  4.42225  2.77519  2.73123  3.46354  2.40513  3.72494  3.29354  2.67741  2.69355  4.24690  2.90346  2.73739  3.18146  2.89801  2.37887  2.77519  2.98518  4.58477  3.61503
          0.03322  4.83785  3.69886  0.61958  0.77255  0.52118  0.90095
    196   2.45467  5.43630  2.39873  2.26795  4.56880  1.95763  3.65432  4.26428  2.36873  3.68760  4.47760  2.92532  2.50532  2.78474  3.08102  2.78113  2.97576  3.74736  5.87004  4.45986    372 - -
          2.68618  4.42225  2.77519  2.73123  3.46354  2.40513  3.72494  3.29354  2.67741  2.69355  4.24690  2.90346  2.73739  3.18146  2.89801  2.37887  2.77519  2.98518  4.58477  3.61503
          0.02143  5.11943  4.18477  0.61958  0.77255  0.91824  0.50953
    197   2.31384  5.33828  2.86391  2.40494  4.64282  1.74017  3.80932  3.61138  2.51239  3.62613  4.38989  3.09428  3.75329  2.96343  3.06627  2.56104  2.90059  2.53626  5.79605  4.32727    373 - -
          2.68618  4.42225  2.77519  2.73123  3.46354  2.40513  3.72494  3.29354  2.67741  2.69355  4.24690  2.90346  2.73739  3.18146  2.89801  2.37887  2.77519  2.98518  4.58477  3.61503
          0.12981  5.12128  2.15614  0.61958  0.77255  0.92362  0.50597
    198   2.42306  5.29102  3.07630  2.23753  3.03029  2.55489  3.53773  3.94077  2.12482  3.51973  4.22437  3.02251  3.76339  2.75143  2.78541  2.72575  2.83729  3.30966  3.20220  4.10177    374 - -
          2.68618  4.42225  2.77519  2.73123  3.46354  2.40513  3.72494  3.29354  2.67741  2.69355  4.24690  2.90346  2.73739  3.18146  2.89801  2.37887  2.77519  2.98518  4.58477  3.61503
          0.34551  5.01528  1.25349  0.61958  0.77255  0.93186  0.50058
    199   2.25984  4.92056  3.06858  2.56979  3.18713  3.07683  3.84000  3.54773  2.46408  2.76455  3.99653  3.09162  2.42996  2.80530  2.92667  2.71866  2.92008  2.93491  4.83046  3.42327    375 - -
          2.68618  4.42225  2.77519  2.73123  3.46354  2.40513  3.72494  3.29354  2.67741  2.69355  4.24690  2.90346  2.73739  3.18146  2.89801  2.37887  2.77519  2.98518  4.58477  3.61503
          0.03601  4.75852  3.61958  0.61958  0.77255  1.29271  0.32093
    200   2.65165  4.38226  3.86811  2.82867  2.46479  3.44650  4.06707  2.55318  3.24021  1.88343  3.34183  3.59280  2.88789  3.51103  3.22041  3.07621  2.89896  2.21122  4.98168  3.57999    376 - -
          2.68618  4.42225  2.77519  2.73123  3.46354  2.40513  3.72494  3.29354  2.67741  2.69355  4.24690  2.90346  2.73739  3.18146  2.89801  2.37887  2.77519  2.98518  4.58477  3.61503
          0.02048  4.78215  4.43183  0.61958  0.77255  1.40822  0.28048
    201   2.44634  4.90431  2.32752  2.44274  3.93772  3.32343  3.74996  2.84717  2.66429  2.81337  3.90194  3.20170  3.70370  2.90437  3.03113  2.81802  2.63550  2.17144  5.42426  4.10953    377 - -
          2.68618  4.42225  2.77519  2.73123  3.46354  2.40513  3.72494  3.29354  2.67741  2.69355  4.24690  2.90346  2.73739  3.18146  2.89801  2.37887  2.77519  2.98518  4.58477  3.61503
          0.01256  4.77950  5.50185  0.61958  0.77255  1.41790  0.27736
    202   2.07389  4.25199  2.92632  2.86776  3.59998  3.48943  3.44077  2.94470  2.73837  1.92939  3.35440  3.35589  4.02190  3.11736  3.19815  2.60654  2.92231  2.68159  5.21282  3.77675    378 - -
          2.68618  4.42225  2.77519  2.73123  3.46354  2.40513  3.72494  3.29354  2.67741  2.69355  4.24690  2.90346  2.73739  3.18146  2.89801  2.37887  2.77519  2.98518  4.58477  3.61503
          0.01711  4.78267  4.75658  0.61958  0.77255  1.39827  0.28372
    203   2.09316  4.47201  3.71956  3.12660  3.48377  3.45492  3.13738  2.80267  3.05816  1.97323  3.44054  3.57541  3.86396  3.23981  3.12099  2.79390  2.96294  1.99744  4.82981  3.72883    379 - -
          2.68618  4.42225  2.77519  2.73123  3.46354  2.40513  3.72494  3.29354  2.67741  2.69355  4.24690  2.90346  2.73739  3.18146  2.89801  2.37887  2.77519  2.98518  4.58477  3.61503
          0.01248  4.78596  5.50830  0.61958  0.77255  1.42378  0.27549
    204   2.14210  5.04342  2.92892  2.50965  3.98651  3.06809  3.60073  3.53871  2.60364  2.78382  3.84973  3.13390  3.49419  2.79983  2.75018  2.45261  2.19529  3.13257  5.53624  3.94923    380 - -
          2.68620  4.42245  2.77479  2.73127  3.46374  2.40524  3.72515  3.29374  2.67751  2.69311  4.24710  2.90345  2.73753  3.18154  2.89787  2.37892  2.77535  2.98497  4.58497  3.61500
          0.98220  0.47568  5.50830  0.05881  2.86270  0.49844  0.93516
    205   2.34426  5.32418  2.63704  2.00663  3.41954  2.69240  3.81405  3.65459  2.60824  3.08887  3.81998  3.02994  2.85310  2.95882  3.13164  2.64049  2.65070  3.27546  5.78614  3.94429    382 - -
          2.68609  4.42258  2.77525  2.73102  3.46398  2.40471  3.72550  3.29394  2.67774  2.69376  4.24691  2.90382  2.73723  3.18050  2.89816  2.37894  2.77534  2.98456  4.58487  3.61527
          1.28593  0.96011  1.07659  1.32019  0.31073  0.47493  0.97268
    206   2.72710  5.24987  2.91262  2.22351  4.55836  3.16049  3.74651  3.97032  2.46950  3.29074  2.83470  2.91350  3.53923  2.69709  2.65036  2.47484  2.23093  3.11747  5.70508  3.49700    392 - -
          2.68618  4.42225  2.77519  2.73123  3.46354  2.40513  3.72494  3.29354  2.67741  2.69355  4.24690  2.90346  2.73739  3.18146  2.89801  2.37887  2.77519  2.98518  4.58477  3.61503
          0.08051  4.88707  2.66201  0.61958  0.77255  0.18854  1.76122
    207   2.73544  5.29689  2.95381  2.64772  3.57067  1.93931  4.00525  3.23321  2.28400  2.73435  4.11296  2.94918  3.33113  3.05266  2.61501  2.78342  2.97998  3.10470  5.15568  3.78750    393 - -
          2.68618  4.42225  2.77519  2.73123  3.46354  2.40513  3.72494  3.29354  2.67741  2.69355  4.24690  2.90346  2.73739  3.18146  2.89801  2.37887  2.77519  2.98518  4.58477  3.61503
          0.00776  5.25865  5.98100  0.61958  0.77255  0.42746  1.05602
    208   2.68453  5.25628  2.84296  2.58132  3.72717  2.68850  4.04468  3.06954  2.33665  2.84971  2.91707  3.30251  4.12991  2.84954  2.76361  2.78473  2.31783  2.91821  5.75168  3.30365    394 - -
          2.68618  4.42225  2.77519  2.73123  3.46354  2.40513  3.72494  3.29354  2.67741  2.69355  4.24690  2.90346  2.73739  3.18146  2.89801  2.37887  2.77519  2.98518  4.58477  3.61503
          0.00744  5.29991  6.02225  0.61958  0.77255  0.49054  0.94751
    209   2.33845  5.43532  2.91160  2.49645  4.74441  3.31564  3.88491  3.11661  2.45147  2.34157  3.72329  2.85929  3.66384  2.83910  2.38824  2.63032  2.56512  3.20794  5.89017  3.88015    395 - -
          2.68618  4.42225  2.77519  2.73123  3.46354  2.40513  3.72494  3.29354  2.67741  2.69355  4.24690  2.90346  2.73739  3.18146  2.89801  2.37887  2.77519  2.98518  4.58477  3.61503
          0.02780  5.30322  3.79689  0.61958  0.77255  0.49846  0.93512
    210   2.37070  5.25575  2.98109  2.43420  3.77579  3.12755  3.46181  3.44271  2.45323  1.74905  4.01692  3.17411  3.91589  3.10866  2.76021  2.90777  3.00417  2.93877  5.74946  3.69215    396 - -
          2.68618  4.42225  2.77519  2.73123  3.46354  2.40513  3.72494  3.29354  2.67741  2.69355  4.24690  2.90346  2.73739  3.18146  2.89801  2.37887  2.77519  2.98518  4.58477  3.61503
          0.01229  5.28299  4.94227  0.61958  0.77255  0.57125  0.83200
    211   2.41102  5.44571  3.14203  2.56783  4.67562  3.06524  3.51009  3.92126  2.64321  2.54440  4.12090  2.22493  2.84138  2.37673  2.61288  2.88086  2.90317  3.14845  5.53084  3.72568    397 - -
          2.68618  4.42225  2.77519  2.73123  3.46354  2.40513  3.72494  3.29354  2.67741  2.69355  4.24690  2.90346  2.73739  3.18146  2.89801  2.37887  2.77519  2.98518  4.58477  3.61503
          0.02449  5.27831  3.95831  0.61958  0.77255  0.58717  0.81170
    212   2.05365  4.69356  2.73587  2.56224  4.21424  3.06987  3.99441  4.01457  2.60105  2.87454  3.66677  2.70534  2.82805  3.09060  3.05699  2.52031  2.41284  3.32783  5.30777  3.28515    398 - -
          2.68618  4.42225  2.77519  2.73123  3.46354  2.40513  3.72494  3.29354  2.67741  2.69355  4.24690  2.90346  2.73739  3.18146  2.89801  2.37887  2.77519  2.98518  4.58477  3.61503
          0.00958  5.26155  5.43770  0.61958  0.77255  0.57576  0.82617
    213   2.46508  4.22221  2.63381  2.79061  2.72657  2.68197  3.61504  3.52578  2.64675  2.29565  3.83245  3.16628  3.50460  3.02206  2.67220  2.88358  2.72883  3.19567  5.68267  3.57195    399 - -
          2.68618  4.42225  2.77519  2.73123  3.46354  2.40513  3.72494  3.29354  2.67741  2.69355  4.24690  2.90346  2.73739  3.18146  2.89801  2.37887  2.77519  2.98518  4.58477  3.61503
          0.18859  5.27110  1.79136  0.61958  0.77255  0.48506  0.95623
    214   2.30306  5.07710  2.40117  2.63825  3.91016  2.68405  3.81509  3.48992  2.61849  2.96920  4.07878  2.97095  2.46225  2.94957  2.55579  2.78029  2.84688  3.22884  5.75577  3.89423    400 - -
          2.68618  4.42225  2.77519  2.73123  3.46354  2.40513  3.72494  3.29354  2.67741  2.69355  4.24690  2.90346  2.73739  3.18146  2.89801  2.37887  2.77519  2.98518  4.58477  3.61503
          0.06491  5.11807  2.86709  0.61958  0.77255  0.96347  0.48057
    215   2.27181  4.19494  2.71795  2.55316  3.91786  3.15025  3.37892  3.59260  2.39465  3.26063  3.94541  2.68551  3.84243  2.60451  2.72934  2.49211  2.94950  3.07588  5.35791  2.99736    401 - -
          2.68618  4.42225  2.77519  2.73123  3.46354  2.40513  3.72494  3.29354  2.67741  2.69355  4.24690  2.90346  2.73739  3.18146  2.89801  2.37887  2.77519  2.98518  4.58477  3.61503
          0.02870  5.06841  3.81683  0.61958  0.77255  1.08015  0.41483
    216   2.35803  5.34819  2.51020  2.46087  3.58561  2.71477  3.87021  3.45309  2.27395  3.57818  3.87821  2.73880  2.81161  2.63864  3.03726  2.68260  2.73616  3.21303  5.53885  4.23276    402 - -
          2.68618  4.42225  2.77519  2.73123  3.46354  2.40513  3.72494  3.29354  2.67741  2.69355  4.24690  2.90346  2.73739  3.18146  2.89801  2.37887  2.77519  2.98518  4.58477  3.61503
          0.08258  5.04929  2.61942  0.61958  0.77255  1.11123  0.39922
    217   2.72613  5.08403  3.07563  2.54150  3.45669  2.76666  3.25690  3.45491  2.61992  2.39347  4.08983  3.16897  2.77006  2.87692  2.48304  2.78596  2.73121  2.91292  5.58424  3.55186    403 - -
          2.68618  4.42225  2.77519  2.73123  3.46354  2.40513  3.72494  3.29354  2.67741  2.69355  4.24690  2.90346  2.73739  3.18146  2.89801  2.37887  2.77519  2.98518  4.58477  3.61503
          0.06620  4.97701  2.86191  0.61958  0.77255  0.84462  0.56163
    218   2.59762  5.09357  3.02389  2.55882  3.74039  2.67789  3.43258  3.20267  2.61285  3.00097  3.98900  3.12683  2.52359  3.07502  2.49062  2.76754  3.10466  2.68634  5.59583  2.92175    404 - -
          2.68618  4.42225  2.77519  2.73123  3.46354  2.40513  3.72494  3.29354  2.67741  2.69355  4.24690  2.90346  2.73739  3.18146  2.89801  2.37887  2.77519  2.98518  4.58477  3.61503
          0.03794  5.02256  3.48535  0.61958  0.77255  0.67236  0.71437
    219   2.05874  4.74479  2.65903  2.73342  3.75107  3.20913  4.04155  3.02109  2.90805  2.61211  3.49371  3.20549  2.68462  2.98867  3.34198  2.54987  3.06726  2.33322  5.48390  3.92011    405 - -
          2.68618  4.42225  2.77519  2.73123  3.46354  2.40513  3.72494  3.29354  2.67741  2.69355  4.24690  2.90346  2.73739  3.18146  2.89801  2.37887  2.77519  2.98518  4.58477  3.61503
          0.10659  5.12142  2.35239  0.61958  0.77255  0.64985  0.73841
    220   2.61615  4.41638  3.56516  3.20572  3.47600  2.40178  4.02982  2.83640  3.19606  1.80206  2.64691  3.55166  3.94984  3.43663  3.29984  2.87614  3.03682  2.08409  5.18463  3.91175    406 - -
          2.68618  4.42225  2.77519  2.73123  3.46354  2.40513  3.72494  3.29354  2.67741  2.69355  4.24690  2.90346  2.73739  3.18146  2.89801  2.37887  2.77519  2.98518  4.58477  3.61503
          0.01450  5.10601  4.78668  0.61958  0.77255  0.78887  0.60579
    221   2.46370  5.12987  3.16605  2.64843  3.97714  2.25187  3.68224  3.36394  2.68132  2.70087  2.72209  3.04316  3.75948  2.96177  2.49425  2.69276  2.86039  2.83131  5.38178  4.06122    407 - -
          2.68618  4.42225  2.77519  2.73123  3.46354  2.40513  3.72494  3.29354  2.67741  2.69355  4.24690  2.90346  2.73739  3.18146  2.89801  2.37887  2.77519  2.98518  4.58477  3.61503
          0.02305  5.14925  4.07566  0.61958  0.77255  0.61091  0.78276
    222   2.58452  5.29095  3.15452  2.46918  3.81716  2.87319  3.75032  2.84116  2.55947  3.25872  2.97334  2.92087  3.33223  2.92643  2.68948  2.26429  2.44216  3.19751  5.76846  3.96563    408 - -
          2.68618  4.42225  2.77519  2.73123  3.46354  2.40513  3.72494  3.29354  2.67741  2.69355  4.24690  2.90346  2.73739  3.18146  2.89801  2.37887  2.77519  2.98518  4.58477  3.61503
          0.04398  5.20394  3.28265  0.61958  0.77255  0.76421  0.62680
    223   2.46709  5.43254  2.77336  2.34125  4.48463  2.69820  3.48070  4.15756  2.57914  3.42147  3.56405  2.88309  3.34136  2.56813  2.69246  2.41574  2.48791  2.96760  5.29881  3.66056    409 - -
          2.68618  4.42225  2.77519  2.73123  3.46354  2.40513  3.72494  3.29354  2.67741  2.69355  4.24690  2.90346  2.73739  3.18146  2.89801  2.37887  2.77519  2.98518  4.58477  3.61503
          0.18152  5.17577  1.83040  0.61958  0.77255  0.64894  0.73940
    224   2.54668  5.37235  2.35401  2.41702  4.41686  2.90582  3.86859  3.50580  2.42936  3.21511  3.68736  2.90763  2.48713  2.80843  2.68766  2.39550  2.91260  3.34617  5.81462  4.41339    410 - -
          2.68618  4.42225  2.77519  2.73123  3.46354  2.40513  3.72494  3.29354  2.67741  2.69355  4.24690  2.90346  2.73739  3.18146  2.89801  2.37887  2.77519  2.98518  4.58477  3.61503
          0.01412  5.05683  4.87219  0.61958  0.77255  0.52751  0.89178
    225   2.23164  5.45353  2.65775  2.31224  4.01371  2.20528  3.61441  3.98577  2.37640  3.24787  4.20152  2.98834  2.96061  2.83146  2.95659  2.60571  2.79377  3.54608  5.89149  3.96389    411 - -
          2.68618  4.42225  2.77519  2.73123  3.46354  2.40513  3.72494  3.29354  2.67741  2.69355  4.24690  2.90346  2.73739  3.18146  2.89801  2.37887  2.77519  2.98518  4.58477  3.61503
          0.01934  5.20041  4.29471  0.61958  0.77255  0.77430  0.61809
    226   2.14019  5.46491  2.63314  2.23944  4.24499  2.63726  3.80747  4.21354  2.49617  3.03985  4.50639  2.91571  2.52357  2.67930  2.73990  2.54902  3.02127  3.72732  5.89946  4.24257    412 - -
          2.68618  4.42225  2.77519  2.73123  3.46354  2.40513  3.72494  3.29354  2.67741  2.69355  4.24690  2.90346  2.73739  3.18146  2.89801  2.37887  2.77519  2.98518  4.58477  3.61503
          0.05235  5.19631  3.09082  0.61958  0.77255  0.82219  0.57887
    227   2.39502  5.37331  2.40483  2.27038  3.79338  2.75201  3.77547  3.32226  2.35043  3.20614  3.29935  3.07887  3.48007  2.78718  2.69664  2.70265  2.86113  3.17836  4.71150  4.43527    413 - -
          2.68618  4.42225  2.77519  2.73123  3.46354  2.40513  3.72494  3.29354  2.67741  2.69355  4.24690  2.90346  2.73739  3.18146  2.89801  2.37887  2.77519  2.98518  4.58477  3.61503
          0.15393  5.15260  1.98862  0.61958  0.77255  0.74059  0.64785
    228   2.62555  5.25115  2.87226  2.40968  4.20350  2.76857  3.64142  3.10990  2.27233  3.19556  3.48151  3.05817  2.87206  2.86593  2.92775  2.68349  2.50824  2.75727  5.44146  3.85780    414 - -
          2.68618  4.42225  2.77519  2.73123  3.46354  2.40513  3.72494  3.29354  2.67741  2.69355  4.24690  2.90346  2.73739  3.18146  2.89801  2.37887  2.77519  2.98518  4.58477  3.61503
          0.07489  5.05074  2.72186  0.61958  0.77255  0.95197  0.48773
    229   2.24404  5.18530  2.33330  2.54955  3.58182  2.77371  3.81053  3.37216  2.55907  2.66280  3.81777  3.14951  2.92326  2.93804  2.71559  2.78689  2.89420  3.03944  5.66814  4.31034    415 - -
          2.68618  4.42225  2.77519  2.73123  3.46354  2.40513  3.72494  3.29354  2.67741  2.69355  4.24690  2.90346  2.73739  3.18146  2.89801  2.37887  2.77519  2.98518  4.58477  3.61503
          0.19171  5.02296  1.78459  0.61958  0.77255  0.96814  0.47769
    230   2.09768  5.26878  2.67573  2.43205  4.58360  2.95182  3.50231  3.64248  2.40026  3.35909  3.84579  3.05108  3.02814  2.71440  2.78298  2.42069  2.59173  3.50793  4.26286  4.00719    416 - -
          2.68659  4.42293  2.77576  2.73175  3.46408  2.40385  3.72486  3.29364  2.67788  2.69404  4.23834  2.90335  2.73794  3.18126  2.89765  2.37924  2.77561  2.98446  4.58545  3.61565
          0.27328  1.66999  2.97841  2.14903  0.12397  0.62190  0.76986
    231   2.29648  5.28116  2.85049  2.57812  4.38843  2.79838  3.86076  3.38723  2.51643  2.61251  4.11779  2.88427  2.85798  2.69458  3.00030  2.60821  2.35297  3.06184  5.74719  4.37095    445 - -
          2.68618  4.42225  2.77519  2.73123  3.46354  2.40513  3.72494  3.29354  2.67741  2.69355  4.24690  2.90346  2.73739  3.18146  2.89801  2.37887  2.77519  2.98518  4.58477  3.61503
          0.02374  5.07276  4.06304  0.61958  0.77255  0.47734  0.96872
    232   2.14121  5.43118  2.84603  2.50994  4.07466  2.64259  3.86765  3.72807  2.48225  3.20103  4.34713  2.74498  2.78374  3.00328  2.82557  2.29844  2.52162  3.27146  5.87634  4.42582    446 - -
          2.68618  4.42225  2.77519  2.73123  3.46354  2.40513  3.72494  3.29354  2.67741  2.69355  4.24690  2.90346  2.73739  3.18146  2.89801  2.37887  2.77519  2.98518  4.58477  3.61503
          0.03071  5.21337  3.69695  0.61958  0.77255  0.76916  0.62250
    233   2.22308  5.46273  2.83140  2.18176  4.80442  2.54942  3.92252  3.94541  2.47972  3.51730  4.50429  3.15041  2.22041  2.48993  2.63978  2.79130  2.89279  3.58039  5.89744  4.36766    447 - -
          2.68618  4.42225  2.77519  2.73123  3.46354  2.40513  3.72494  3.29354  2.67741  2.69355  4.24690  2.90346  2.73739  3.18146  2.89801  2.37887  2.77519  2.98518  4.58477  3.61503
          0.00829  5.19277  5.91511  0.61958  0.77255  0.42538  1.05993
    234   2.62128  5.30879  2.78219  2.53381  4.36704  3.52072  3.77741  2.78432  2.39646  2.08243  3.97824  3.20997  3.26431  2.86419  2.80269  2.76601  2.62887  2.62368  5.79044  4.35384    448 - -
          2.68618  4.42225  2.77519  2.73123  3.46354  2.40513  3.72494  3.29354  2.67741  2.69355  4.24690  2.90346  2.73739  3.18146  2.89801  2.37887  2.77519  2.98518  4.58477  3.61503
          0.01038  5.27891  5.25281  0.61958  0.77255  0.57329  0.82935
    235   2.29714  5.14010  2.91343  2.27420  4.56305  3.20633  3.92634  3.78071  2.56736  2.46169  2.52935  2.91055  2.50027  2.80758  3.07292  2.78033  2.99253  3.48863  5.86455  4.37985    449 - -
          2.68618  4.42225  2.77519  2.73123  3.46354  2.40513  3.72494  3.29354  2.67741  2.69355  4.24690  2.90346  2.73739  3.18146  2.89801  2.37887  2.77519  2.98518  4.58477  3.61503
          0.07103  5.27812  2.75728  0.61958  0.77255  0.58780  0.81091
    236   2.34332  5.46532  2.44049  2.50927  4.56402  3.33751  3.81142  3.98643  2.49729  3.29910  4.09243  3.14067  2.33477  2.23828  2.79192  2.65475  2.43355  3.57828  5.90203  4.42010    450 - -
          2.68618  4.42225  2.77519  2.73123  3.46354  2.40513  3.72494  3.29354  2.67741  2.69355  4.24690  2.90346  2.73739  3.18146  2.89801  2.37887  2.77519  2.98518  4.58477  3.61503
          0.03307  5.21519  3.60852  0.61958  0.77255  0.71970  0.66728
    237   2.63664  5.23351  2.59315  2.38037  2.45029  3.65831  3.98795  3.57158  2.73140  2.46954  4.07936  2.47688  3.37938  2.94439  2.81419  2.86385  2.93605  2.62008  5.72337  4.30136    451 - -
          2.68618  4.42225  2.77519  2.73123  3.46354  2.40513  3.72494  3.29354  2.67741  2.69355  4.24690  2.90346  2.73739  3.18146  2.89801  2.37887  2.77519  2.98518  4.58477  3.61503
          0.00822  5.20052  5.92286  0.61958  0.77255  0.64768  0.74078
    238   2.50058  5.42262  2.82955  2.55100  4.18376  3.70280  3.69830  3.92966  2.37617  2.84478  4.01658  2.95485  2.70448  2.78191  2.19169  2.63479  2.39649  3.02810  4.83394  4.47832    452 - -
          2.68618  4.42225  2.77519  2.73123  3.46354  2.40513  3.72494  3.29354  2.67741  2.69355  4.24690  2.90346  2.73739  3.18146  2.89801  2.37887  2.77519  2.98518  4.58477  3.61503
          0.00797  5.23187  5.95421  0.61958  0.77255  0.72930  0.65826
    239   2.75844  4.43234  4.64902  4.20498  2.83823  3.57482  4.26417  2.48037  3.50587  1.64507  3.31483  3.94508  2.70208  3.91303  4.10087  3.47841  2.63418  1.67762  4.17859  3.54670    453 - -
          2.68618  4.42225  2.77519  2.73123  3.46354  2.40513  3.72494  3.29354  2.67741  2.69355  4.24690  2.90346  2.73739  3.18146  2.89801  2.37887  2.77519  2.98518  4.58477  3.61503
          0.00797  5.23187  5.95421  0.61958  0.77255  0.44058  1.03187
    240   2.02699  5.45578  2.48654  2.66529  4.27457  3.01058  3.98026  3.37527  2.41991  3.13346  4.35647  3.03256  2.80782  2.60204  3.06030  2.37539  2.72817  3.06180  5.90375  4.38547    454 - -
          2.68618  4.42225  2.77519  2.73123  3.46354  2.40513  3.72494  3.29354  2.67741  2.69355  4.24690  2.90346  2.73739  3.18146  2.89801  2.37887  2.77519  2.98518  4.58477  3.61503
          0.05039  5.28817  3.12162  0.61958  0.77255  0.44576  1.02260
    241   2.74974  5.47588  2.20626  1.96851  4.24669  3.07109  3.83325  3.83703  2.45735  2.85602  4.33879  3.00435  2.95486  3.00644  2.84341  2.59067  2.65749  2.97132  5.51108  4.39981    455 - -
          2.68618  4.42225  2.77519  2.73123  3.46354  2.40513  3.72494  3.29354  2.67741  2.69355  4.24690  2.90346  2.73739  3.18146  2.89801  2.37887  2.77519  2.98518  4.58477  3.61503
          0.04296  5.26483  3.30007  0.61958  0.77255  0.58699  0.81192
    242   2.38427  4.63847  3.72019  3.21057  3.14033  3.59238  4.31017  2.51331  3.32803  1.67148  3.36690  3.15716  2.40723  3.67416  3.49431  2.81473  3.11681  2.47428  5.23296  3.57859    456 - -
          2.68618  4.42225  2.77519  2.73123  3.46354  2.40513  3.72494  3.29354  2.67741  2.69355  4.24690  2.90346  2.73739  3.18146  2.89801  2.37887  2.77519  2.98518  4.58477  3.61503
          0.01286  5.23767  4.89695  0.61958  0.77255  0.54883  0.86187
    243   2.71529  5.47867  2.21097  2.31087  4.39718  3.14399  3.82372  3.96831  2.38603  3.11080  3.47128  2.92355  2.38007  2.82526  3.02245  2.44823  2.74368  3.36572  5.03291  4.51335    457 - -
          2.68618  4.42225  2.77519  2.73123  3.46354  2.40513  3.72494  3.29354  2.67741  2.69355  4.24690  2.90346  2.73739  3.18146  2.89801  2.37887  2.77519  2.98518  4.58477  3.61503
          0.14998  5.26313  2.00917  0.61958  0.77255  0.58273  0.81728
    244   2.13170  5.03550  3.09778  2.70335  3.20154  2.86959  4.01261  3.01295  2.58004  2.48209  4.11484  3.22649  2.96633  2.95386  2.97853  2.71039  2.60308  2.74447  4.85754  4.16010    458 - -
          2.68618  4.42225  2.77519  2.73123  3.46354  2.40513  3.72494  3.29354  2.67741  2.69355  4.24690  2.90346  2.73739  3.18146  2.89801  2.37887  2.77519  2.98518  4.58477  3.61503
          0.05386  5.13268  3.06748  0.61958  0.77255  0.42127  1.06774
    245   2.49332  5.36419  2.46798  2.61084  4.10794  3.22496  3.81246  3.78186  2.59452  2.20838  3.34909  2.80466  3.38488  2.92645  2.45248  2.54429  2.78877  3.30937  5.82673  3.90621    459 - -
          2.68618  4.42225  2.77519  2.73123  3.46354  2.40513  3.72494  3.29354  2.67741  2.69355  4.24690  2.90346  2.73739  3.18146  2.89801  2.37887  2.77519  2.98518  4.58477  3.61503
          0.00805  5.22223  5.94457  0.61958  0.77255  0.50122  0.93087
    246   2.28189  5.38856  3.06165  2.46124  3.89924  3.24494  3.76825  3.82067  2.40347  2.96633  3.65699  3.11308  2.15564  2.92889  2.77034  2.55526  2.90885  2.79320  5.85096  4.10081    460 - -
          2.68618  4.42225  2.77519  2.73123  3.46354  2.40513  3.72494  3.29354  2.67741  2.69355  4.24690  2.90346  2.73739  3.18146  2.89801  2.37887  2.77519  2.98518  4.58477  3.61503
          0.05647  5.27161  3.00043  0.61958  0.77255  0.60938  0.78457
    247   2.21574  5.44962  2.49458  2.44890  4.77984  3.06045  3.89918  4.04998  2.43997  2.81670  4.37347  2.81974  2.82717  2.88282  3.01541  2.36914  2.49102  3.11178  4.68285  4.48947    461 - -
          2.68618  4.42225  2.77519  2.73123  3.46354  2.40513  3.72494  3.29354  2.67741  2.69355  4.24690  2.90346  2.73739  3.18146  2.89801  2.37887  2.77519  2.98518  4.58477  3.61503
          0.06448  5.22318  2.86374  0.61958  0.77255  0.74125  0.64726
    248   2.08424  5.43880  2.66707  2.28610  4.20947  3.06511  3.68096  4.15299  2.27987  2.75747  4.48181  3.03914  3.15897  2.80092  2.94583  2.70617  2.27683  3.40042  5.87688  4.47138    462 - -
          2.68618  4.42225  2.77519  2.73123  3.46354  2.40513  3.72494  3.29354  2.67741  2.69355  4.24690  2.90346  2.73739  3.18146  2.89801  2.37887  2.77519  2.98518  4.58477  3.61503
          0.03077  5.16941  3.70459  0.61958  0.77255  0.57556  0.82643
    249   2.39929  5.41619  2.72327  1.95313  4.50639  3.39649  3.88441  3.91147  2.56492  2.56837  4.46391  3.20851  3.06012  2.72474  2.98505  2.53422  2.90948  3.25568  5.86510  2.68145    463 - -
          2.68618  4.42225  2.77519  2.73123  3.46354  2.40513  3.72494  3.29354  2.67741  2.69355  4.24690  2.90346  2.73739  3.18146  2.89801  2.37887  2.77519  2.98518  4.58477  3.61503
          0.02779  5.21343  3.81821  0.61958  0.77255  0.74324  0.64545
    250   2.69925  5.46131  2.51256  2.31069  4.49402  2.23220  3.76900  3.86598  2.30317  3.38959  3.84756  3.09778  2.64091  2.79176  2.79013  2.53897  2.77753  3.65612  5.89728  3.82264    464 - -
          2.68618  4.42225  2.77519  2.73123  3.46354  2.40513  3.72494  3.29354  2.67741  2.69355  4.24690  2.90346  2.73739  3.18146  2.89801  2.37887  2.77519  2.98518  4.58477  3.61503
          0.01087  5.20043  5.24013  0.61958  0.77255  0.50845  0.91987
    251   2.24645  5.35151  2.65921  2.41098  4.51816  3.79547  3.61780  3.09858  2.43862  2.06012  3.78855  3.24180  3.55235  2.77830  2.67154  2.73364  2.75675  3.27079  5.29291  4.10167    465 - -
          2.68618  4.42225  2.77519  2.73123  3.46354  2.40513  3.72494  3.29354  2.67741  2.69355  4.24690  2.90346  2.73739  3.18146  2.89801  2.37887  2.77519  2.98518  4.58477  3.61503
          0.00775  5.25937  5.98172  0.61958  0.77255  0.39604  1.11772
    252   2.51606  5.45645  2.91830  2.48989  3.63889  3.50787  3.87767  3.81820  2.25601  2.53150  4.36578  2.93622  1.99226  2.94812  3.00983  2.44138  2.84189  3.53195  5.90650  4.29978    466 - -
          2.68618  4.42225  2.77519  2.73123  3.46354  2.40513  3.72494  3.29354  2.67741  2.69355  4.24690  2.90346  2.73739  3.18146  2.89801  2.37887  2.77519  2.98518  4.58477  3.61503
          0.05639  5.30656  2.99838  0.61958  0.77255  0.48576  0.95510
    253   2.40896  5.22273  3.05848  2.61980  3.37140  3.67340  3.86911  3.24656  2.45393  2.54920  4.11588  3.20171  3.26510  2.90998  2.43838  2.54675  2.46866  2.52250  4.95267  4.27061    467 - -
          2.68618  4.42225  2.77519  2.73123  3.46354  2.40513  3.72494  3.29354  2.67741  2.69355  4.24690  2.90346  2.73739  3.18146  2.89801  2.37887  2.77519  2.98518  4.58477  3.61503
          0.03322  5.25794  3.59460  0.61958  0.77255  0.62599  0.76514
    254   2.20911  5.03179  3.02872  2.53273  4.52888  3.47380  3.79884  3.10913  2.53390  3.40080  3.95507  2.87508  2.77420  2.88495  2.08525  2.68445  2.62928  2.82944  5.85025  4.27467    468 - -
          2.68618  4.42225  2.77519  2.73123  3.46354  2.40513  3.72494  3.29354  2.67741  2.69355  4.24690  2.90346  2.73739  3.18146  2.89801  2.37887  2.77519  2.98518  4.58477  3.61503
          0.00793  5.23737  5.95971  0.61958  0.77255  0.65700  0.73065
    255   2.25890  3.69226  2.86222  2.66266  3.47080  3.56716  3.68359  3.84571  2.51950  2.26867  4.01216  3.20957  2.54597  2.81539  2.84616  2.79838  2.64788  3.15871  4.39456  4.37525    469 - -
          2.68618  4.42225  2.77519  2.73123  3.46354  2.40513  3.72494  3.29354  2.67741  2.69355  4.24690  2.90346  2.73739  3.18146  2.89801  2.37887  2.77519  2.98518  4.58477  3.61503
          0.03660  5.24738  3.48425  0.61958  0.77255  0.45055  1.01411
    256   2.31742  5.13647  2.83445  2.04228  4.11818  3.20431  3.82527  3.63570  2.50462  2.33448  3.99209  3.10314  3.31125  2.69247  2.78982  2.55010  2.66347  3.47262  5.89646  4.34640    470 - -
          2.68618  4.42225  2.77519  2.73123  3.46354  2.40513  3.72494  3.29354  2.67741  2.69355  4.24690  2.90346  2.73739  3.18146  2.89801  2.37887  2.77519  2.98518  4.58477  3.61503
          0.01132  5.26407  5.10197  0.61958  0.77255  0.40329  1.10298
    257   2.47959  5.47519  3.11897  2.37162  4.16085  3.27630  3.76629  3.93343  2.48787  3.37989  4.45505  3.09111  2.16808  2.55905  2.68544  2.53104  2.38118  3.15360  4.06559  4.39170    471 - -
          2.68618  4.42225  2.77519  2.73123  3.46354  2.40513  3.72494  3.29354  2.67741  2.69355  4.24690  2.90346  2.73739  3.18146  2.89801  2.37887  2.77519  2.98518  4.58477  3.61503
          0.00742  5.30313  6.02548  0.61958  0.77255  0.47770  0.96813
    258   2.29634  4.66258  3.65702  3.27364  3.29463  3.01241  4.35778  2.51496  3.12539  1.60958  3.33937  3.72391  3.94303  3.44905  3.60010  3.07600  2.71627  2.05459  5.25878  3.97726    472 - -
          2.68618  4.42225  2.77519  2.73123  3.46354  2.40513  3.72494  3.29354  2.67741  2.69355  4.24690  2.90346  2.73739  3.18146  2.89801  2.37887  2.77519  2.98518  4.58477  3.61503
          0.01020  5.30656  5.26125  0.61958  0.77255  0.48576  0.95510
    259   2.10782  5.47861  3.00991  2.35103  4.19033  3.08921  3.98415  4.00364  2.62507  3.02618  3.79975  3.00277  2.48696  2.81290  2.50195  2.25624  2.76286  3.44722  5.62665  4.52349    473 - -
          2.68618  4.42225  2.77519  2.73123  3.46354  2.40513  3.72494  3.29354  2.67741  2.69355  4.24690  2.90346  2.73739  3.18146  2.89801  2.37887  2.77519  2.98518  4.58477  3.61503
          0.21340  5.30377  1.67562  0.61958  0.77255  0.49636  0.93839
    260   2.49122  4.86616  3.34647  2.62347  3.20964  2.77105  4.02183  3.15166  2.80568  2.00248  3.45012  3.25159  2.91160  3.25260  2.93008  2.55320  2.83176  2.82894  4.42762  4.02156    474 - -
          2.68618  4.42225  2.77519  2.73123  3.46354  2.40513  3.72494  3.29354  2.67741  2.69355  4.24690  2.90346  2.73739  3.18146  2.89801  2.37887  2.77519  2.98518  4.58477  3.61503
          0.04482  5.09948  3.27731  0.61958  0.77255  0.40365  1.10225
    261   2.58385  5.35795  2.74861  2.55077  3.59604  2.95476  3.50156  3.57106  2.56526  2.63720  2.92789  3.02722  2.88832  3.01612  2.38746  2.48695  2.80324  3.41578  5.82249  4.30972    475 - -
          2.68520  4.42376  2.77476  2.73158  3.46379  2.40535  3.72572  3.29391  2.67786  2.69270  4.24540  2.90444  2.73618  3.18163  2.89810  2.37916  2.77553  2.98443  4.58564  3.61626
          1.26502  0.33525  5.94917  1.39171  0.28588  0.49529  0.94006
    262   2.52446  5.50666  2.33843  2.31590  4.47544  3.08924  3.86970  3.76451  2.21336  3.66684  3.42831  2.96538  2.88596  2.68990  2.45456  2.51264  2.64569  3.65622  5.93998  4.52967    504 - -
          2.68618  4.42225  2.77519  2.73123  3.46354  2.40513  3.72494  3.29354  2.67741  2.69355  4.24690  2.90346  2.73739  3.18146  2.89801  2.37887  2.77519  2.98518  4.58477  3.61503
          0.33018  5.27459  1.28705  0.61958  0.77255  0.59957  0.79640
    263   2.63754  4.97337  2.83423  2.50545  3.90130  3.37808  3.66167  3.17217  2.72952  1.90357  3.45931  3.13174  3.56333  2.90743  2.75290  2.61282  2.67153  2.84449  4.93674  4.17918    505 - -
          2.68618  4.42225  2.77519  2.73123  3.46354  2.40513  3.72494  3.29354  2.67741  2.69355  4.24690  2.90346  2.73739  3.18146  2.89801  2.37887  2.77519  2.98518  4.58477  3.61503
          0.05466  4.95494  3.07599  0.61958  0.77255  1.07551  0.41722
    264   2.50314  3.78174  2.18063  2.26440  4.67419  3.23735  3.63740  4.15226  2.43916  3.34052  3.73847  2.93016  2.81660  2.52419  2.81901  2.62513  2.77412  3.27157  5.77997  4.37595    506 - -
          2.68618  4.42225  2.77519  2.73123  3.46354  2.40513  3.72494  3.29354  2.67741  2.69355  4.24690  2.90346  2.73739  3.18146  2.89801  2.37887  2.77519  2.98518  4.58477  3.61503
          0.05071  4.95427  3.16069  0.61958  0.77255  1.00269  0.45711
    265   2.36828  5.34615  2.83633  2.08205  4.67829  2.91521  3.58605  3.97355  2.26659  3.09648  3.09977  3.02589  3.44647  2.83123  2.63720  2.30105  3.00728  3.30319  5.78665  4.26486    507 - -
          2.68618  4.42225  2.77519  2.73123  3.46354  2.40513  3.72494  3.29354  2.67741  2.69355  4.24690  2.90346  2.73739  3.18146  2.89801  2.37887  2.77519  2.98518  4.58477  3.61503
          0.01769  4.97778  4.54281  0.61958  0.77255  0.60580  0.78886
    266   2.30771  4.92270  3.13261  2.73710  3.55001  3.35756  4.06609  3.02118  2.73887  2.42631  3.32407  3.18938  2.15073  2.90586  3.15761  2.94992  2.94429  2.73963  4.59363  3.44493    508 - -
          2.68618  4.42225  2.77519  2.73123  3.46354  2.40513  3.72494  3.29354  2.67741  2.69355  4.24690  2.90346  2.73739  3.18146  2.89801  2.37887  2.77519  2.98518  4.58477  3.61503
          0.04403  5.14318  3.29059  0.61958  0.77255  0.70727  0.67923
    267   2.28097  3.71814  2.39356  2.58105  4.74104  2.60508  3.76505  3.98862  2.16479  3.27223  4.14364  2.96172  3.84848  2.65443  2.82747  2.74201  2.51430  2.97025  5.85667  4.45648    509 - -
          2.68618  4.42225  2.77519  2.73123  3.46354  2.40513  3.72494  3.29354  2.67741  2.69355  4.24690  2.90346  2.73739  3.18146  2.89801  2.37887  2.77519  2.98518  4.58477  3.61503
          0.02680  5.15860  3.87810  0.61958  0.77255  0.40726  1.09504
    268   2.24431  4.69603  3.32257  2.62114  3.80551  3.04907  3.62020  3.54023  2.30628  3.14766  2.65531  2.84377  3.42765  2.83573  2.44063  2.95423  2.73802  2.72867  5.75532  4.13189    510 - -
          2.68618  4.42225  2.77519  2.73123  3.46354  2.40513  3.72494  3.29354  2.67741  2.69355  4.24690  2.90346  2.73739  3.18146  2.89801  2.37887  2.77519  2.98518  4.58477  3.61503
          0.02516  5.25702  3.93060  0.61958  0.77255  0.56387  0.84165
    269   2.71024  5.46722  2.96449  2.27819  3.94275  3.17868  3.64202  3.72918  2.28343  3.55065  4.14177  3.21934  3.46904  2.44110  2.58833  2.48210  2.17655  2.76077  5.90841  3.85757    511 - -
          2.68618  4.42225  2.77519  2.73123  3.46354  2.40513  3.72494  3.29354  2.67741  2.69355  4.24690  2.90346  2.73739  3.18146  2.89801  2.37887  2.77519  2.98518  4.58477  3.61503
          0.01600  5.25614  4.54173  0.61958  0.77255  0.56182  0.84436
    270   2.34109  5.21107  3.16908  2.74053  3.38092  3.33756  3.51634  3.27275  2.42765  2.64503  3.94208  3.25682  3.82914  3.09066  1.84979  2.76532  2.81539  3.06672  5.71234  3.21283    512 - -
          2.68618  4.42225  2.77519  2.73123  3.46354  2.40513  3.72494  3.29354  2.67741  2.69355  4.24690  2.90346  2.73739  3.18146  2.89801  2.37887  2.77519  2.98518  4.58477  3.61503
          0.00771  5.26509  5.98744  0.61958  0.77255  0.55629  0.85176
    271   2.62664  5.45978  2.47632  2.32037  3.35813  3.52944  3.68134  3.68498  2.42659  2.66918  3.76250  2.86877  3.38733  2.71497  2.45169  2.64556  2.77731  3.04522  5.90550  3.93995    513 - -
          2.68618  4.42225  2.77519  2.73123  3.46354  2.40513  3.72494  3.29354  2.67741  2.69355  4.24690  2.90346  2.73739  3.18146  2.89801  2.37887  2.77519  2.98518  4.58477  3.61503
          0.00761  5.27789  6.00023  0.61958  0.77255  0.58858  0.80994
    272   2.84890  4.45408  4.00081  4.16048  2.80741  3.91645  4.31806  2.18148  3.83829  1.83863  2.12614  4.09454  3.88863  4.00370  3.33286  3.38456  2.81299  2.09187  2.85611  3.71793    514 - -
          2.68618  4.42225  2.77519  2.73123  3.46354  2.40513  3.72494  3.29354  2.67741  2.69355  4.24690  2.90346  2.73739  3.18146  2.89801  2.37887  2.77519  2.98518  4.58477  3.61503
          0.01659  5.27789  4.47812  0.61958  0.77255  0.58858  0.80994
    273   2.19821  5.45347  2.65794  2.28694  4.05673  3.47319  3.76799  3.77798  2.42657  3.20175  3.96588  3.11943  4.06145  2.58258  2.59319  2.55403  2.31292  2.80845  5.42839  4.04088    515 - -
          2.68618  4.42225  2.77519  2.73123  3.46354  2.40513  3.72494  3.29354  2.67741  2.69355  4.24690  2.90346  2.73739  3.18146  2.89801  2.37887  2.77519  2.98518  4.58477  3.61503
          0.03943  5.26897  3.39567  0.61958  0.77255  0.61797  0.77444
    274   2.92812  4.46077  4.47447  3.73268  2.60683  3.55151  4.47365  2.30391  3.40177  1.22303  3.11772  4.20936  4.29860  3.75422  2.84338  3.38160  3.02139  2.48728  4.03797  3.89188    516 - -
          2.68618  4.42225  2.77519  2.73123  3.46354  2.40513  3.72494  3.29354  2.67741  2.69355  4.24690  2.90346  2.73739  3.18146  2.89801  2.37887  2.77519  2.98518  4.58477  3.61503
          0.01363  5.23746  4.80046  0.61958  0.77255  0.54291  0.87001
    275   2.65606  5.36367  3.10108  2.41467  3.31949  2.32288  3.84528  3.87823  2.75028  3.57710  4.05506  2.21278  3.87447  3.10716  3.05460  2.26861  2.52898  3.47267  5.83102  2.71708    517 - -
          2.68618  4.42225  2.77519  2.73123  3.46354  2.40513  3.72494  3.29354  2.67741  2.69355  4.24690  2.90346  2.73739  3.18146  2.89801  2.37887  2.77519  2.98518  4.58477  3.61503
          0.11964  5.26349  2.22953  0.61958  0.77255  0.59978  0.79614
    276   2.66984  4.87400  2.93960  1.88055  3.96601  1.99541  3.63259  3.84959  2.57394  3.46141  3.55170  3.13758  3.62223  2.96958  2.59137  2.67648  2.67875  3.49591  5.84044  4.44593    518 - -
          2.68618  4.42225  2.77519  2.73123  3.46354  2.40513  3.72494  3.29354  2.67741  2.69355  4.24690  2.90346  2.73739  3.18146  2.89801  2.37887  2.77519  2.98518  4.58477  3.61503
          0.27022  5.15927  1.46515  0.61958  0.77255  0.88969  0.52896
    277   2.59941  5.23442  2.72658  2.24494  3.98215  2.54607  3.20938  3.68675  2.41481  3.18957  3.09754  3.05097  4.02324  2.61746  2.67946  2.63847  2.74709  3.17616  4.63344  4.07895    519 - -
          2.68618  4.42225  2.77519  2.73123  3.46354  2.40513  3.72494  3.29354  2.67741  2.69355  4.24690  2.90346  2.73739  3.18146  2.89801  2.37887  2.77519  2.98518  4.58477  3.61503
          0.15200  4.90452  2.01294  0.61958  0.77255  0.96577  0.47915
    278   2.60814  5.02142  3.04458  2.56492  3.42080  2.95251  3.56443  2.99129  2.48942  2.99761  2.38538  2.87055  3.24055  2.53528  3.06144  2.76009  2.78262  3.24880  5.52550  4.07420    520 - -
          2.68618  4.42225  2.77519  2.73123  3.46354  2.40513  3.72494  3.29354  2.67741  2.69355  4.24690  2.90346  2.73739  3.18146  2.89801  2.37887  2.77519  2.98518  4.58477  3.61503
          0.03805  4.87084  3.51755  0.61958  0.77255  1.32099  0.31043
    279   1.96335  5.17583  2.79714  2.46735  4.29106  2.84966  3.72491  3.66476  2.54052  3.34284  3.15604  3.03013  3.59374  2.73660  2.59394  2.52739  2.68635  3.21284  5.64499  3.77060    521 - -
          2.68618  4.42225  2.77519  2.73123  3.46354  2.40513  3.72494  3.29354  2.67741  2.69355  4.24690  2.90346  2.73739  3.18146  2.89801  2.37887  2.77519  2.98518  4.58477  3.61503
          0.06648  4.84983  2.87375  0.61958  0.77255  1.31785  0.31158
    280   2.59831  5.19656  2.44020  2.45766  4.24283  2.75586  3.52558  3.74055  2.41791  2.79887  2.49398  2.74986  3.48670  2.60553  2.91996  2.78716  2.96788  3.47773  5.65726  4.27532    522 - -
          2.68618  4.42225  2.77519  2.73123  3.46354  2.40513  3.72494  3.29354  2.67741  2.69355  4.24690  2.90346  2.73739  3.18146  2.89801  2.37887  2.77519  2.98518  4.58477  3.61503
          0.01220  4.80805  5.53040  0.61958  0.77255  0.48855  0.95067
    281   2.17328  4.89575  2.50879  2.31594  4.67060  2.64000  3.77554  4.01855  2.56169  3.73320  3.02176  2.84842  2.93225  2.48512  3.01279  2.50600  2.79430  3.81778  5.86775  4.13519    523 - -
          2.68534  4.42550  2.77493  2.73375  3.46517  2.40087  3.71757  3.29572  2.67940  2.69604  4.21012  2.90176  2.73917  3.18218  2.90038  2.37908  2.77725  2.98727  4.58742  3.61763
          1.53867  0.31614  2.87565  2.31750  0.10372  0.65527  0.73251
    282   2.47945  5.32570  3.04017  2.44173  3.38151  2.05912  3.76254  3.60444  2.47890  3.04552  2.92937  2.79625  3.31316  2.91773  2.92957  2.50924  2.96640  3.62141  5.78956  4.41099    605 - -
          2.68618  4.42225  2.77519  2.73123  3.46354  2.40513  3.72494  3.29354  2.67741  2.69355  4.24690  2.90346  2.73739  3.18146  2.89801  2.37887  2.77519  2.98518  4.58477  3.61503
          0.12505  5.15157  2.19141  0.61958  0.77255  0.44640  1.02145
    283   2.67301  5.45129  2.67468  2.31944  4.20373  2.41666  3.13591  4.28013  2.22894  3.46556  3.76626  2.72699  2.80546  2.84423  2.50970  2.71980  2.75648  3.66344  5.88475  4.36484    606 - -
          2.68618  4.42225  2.77519  2.73123  3.46354  2.40513  3.72494  3.29354  2.67741  2.69355  4.24690  2.90346  2.73739  3.18146  2.89801  2.37887  2.77519  2.98518  4.58477  3.61503
          0.00859  5.15741  5.87976  0.61958  0.77255  0.59255  0.80501
    284   2.85466  5.33203  2.99009  2.41493  4.37541  2.80722  3.32226  3.43536  2.63146  3.14954  2.74634  2.77779  3.58028  2.53568  3.08711  2.63364  2.90011  3.05110  5.32699  2.47931    607 - -
          2.68618  4.42225  2.77519  2.73123  3.46354  2.40513  3.72494  3.29354  2.67741  2.69355  4.24690  2.90346  2.73739  3.18146  2.89801  2.37887  2.77519  2.98518  4.58477  3.61503
          0.03120  5.22512  3.67533  0.61958  0.77255  0.56314  0.84261
    285   2.00142  5.13573  2.99999  2.69567  4.25165  2.91922  3.99567  3.22851  2.79595  2.73655  2.82741  3.23571  3.53835  2.91668  2.78690  2.58866  2.62648  2.54816  4.90002  4.32746    608 - -
          2.68618  4.42225  2.77519  2.73123  3.46354  2.40513  3.72494  3.29354  2.67741  2.69355  4.24690  2.90346  2.73739  3.18146  2.89801  2.37887  2.77519  2.98518  4.58477  3.61503
          0.00994  5.23766  5.38609  0.61958  0.77255  0.47915  0.96576
    286   2.98355  4.51767  4.33126  3.61898  1.96229  3.64994  3.81257  2.96462  3.83106  2.43175  2.93517  2.81028  4.52619  3.80381  4.00089  3.28820  3.25633  2.31537  1.76834  3.24862    609 - -
          2.68618  4.42225  2.77519  2.73123  3.46354  2.40513  3.72494  3.29354  2.67741  2.69355  4.24690  2.90346  2.73739  3.18146  2.89801  2.37887  2.77519  2.98518  4.58477  3.61503
          0.01009  5.28006  5.30845  0.61958  0.77255  0.47362  0.97483
    287   2.61160  5.23582  3.21329  2.68936  3.62698  3.05563  3.74229  3.79447  2.67936  2.46122  3.23879  3.25873  3.78376  2.96302  2.78496  2.46801  1.75093  3.28936  5.73515  3.62545    610 - -
          2.68618  4.42225  2.77519  2.73123  3.46354  2.40513  3.72494  3.29354  2.67741  2.69355  4.24690  2.90346  2.73739  3.18146  2.89801  2.37887  2.77519  2.98518  4.58477  3.61503
          0.04854  5.29619  3.16122  0.61958  0.77255  0.47648  0.97013
    288   2.90657  4.43387  4.95433  3.99220  3.14576  3.63598  4.22071  1.07920  4.14154  1.91768  3.15818  4.35640  4.26365  4.28427  4.17111  3.46329  3.19505  2.09385  5.05633  3.87894    611 - -
          2.68618  4.42225  2.77519  2.73123  3.46354  2.40513  3.72494  3.29354  2.67741  2.69355  4.24690  2.90346  2.73739  3.18146  2.89801  2.37887  2.77519  2.98518  4.58477  3.61503
          0.00772  5.26371  5.98606  0.61958  0.77255  0.54082  0.87292
    289   2.79193  5.51400  2.52153  2.60305  4.84477  2.88969  3.93944  4.32244  2.74221  3.66426  4.10428  1.10486  4.19581  2.99947  3.06299  2.99869  2.96906  3.89733  5.95496  4.54956    612 - -
          2.68618  4.42225  2.77519  2.73123  3.46354  2.40513  3.72494  3.29354  2.67741  2.69355  4.24690  2.90346  2.73739  3.18146  2.89801  2.37887  2.77519  2.98518  4.58477  3.61503
          0.09122  5.28009  2.49993  0.61958  0.77255  0.58115  0.81929
    290   2.86281  5.39726  2.39557  2.59570  4.51321  1.17894  3.69723  4.16277  2.66639  3.68599  3.71151  3.06263  4.16073  3.07467  3.09887  2.85877  3.12862  3.66596  5.85476  4.46723    613 - -
          2.68618  4.42225  2.77519  2.73123  3.46354  2.40513  3.72494  3.29354  2.67741  2.69355  4.24690  2.90346  2.73739  3.18146  2.89801  2.37887  2.77519  2.98518  4.58477  3.61503
          0.08445  5.19712  2.58433  0.61958  0.77255  0.82020  0.58043
    291   2.57607  5.41587  2.95940  2.27482  3.94853  3.56781  3.68629  3.77036  1.77317  3.25956  3.96774  3.03157  4.09869  2.26041  2.22379  2.73889  3.08938  3.21828  5.85428  4.44917    614 - -
          2.68618  4.42225  2.77519  2.73123  3.46354  2.40513  3.72494  3.29354  2.67741  2.69355  4.24690  2.90346  2.73739  3.18146  2.89801  2.37887  2.77519  2.98518  4.58477  3.61503
          0.03156  5.12158  3.68498  0.61958  0.77255  0.53441  0.88192
    292   2.10501  5.40384  2.87671  2.55653  4.34010  3.21434  3.48252  3.75581  2.37216  3.48996  3.76889  3.17763  2.51699  2.80980  2.82936  2.67025  2.30268  2.87685  5.85490  4.16566    615 - -
          2.68605  4.42248  2.77409  2.73152  3.46284  2.40567  3.72439  3.29375  2.67796  2.69413  4.24652  2.90361  2.73618  3.18208  2.89824  2.37935  2.77493  2.98527  4.58368  3.61397
          1.72689  0.95087  0.83066  1.47697  0.25920  0.33033  1.26828
    293   2.73915  5.08696  3.08387  2.58042  4.34968  2.63692  3.65468  3.60258  2.51717  3.32224  3.58872  2.71207  1.76654  2.94936  2.95993  2.71765  2.72505  3.43263  5.19416  4.21831    621 - -
          2.68618  4.42225  2.77519  2.73123  3.46354  2.40513  3.72494  3.29354  2.67741  2.69355  4.24690  2.90346  2.73739  3.18146  2.89801  2.37887  2.77519  2.98518  4.58477  3.61503
          0.03327  4.80976  3.70616  0.61958  0.77255  0.16712  1.87142
    294   2.82033  4.48230  4.75705  3.57345  1.64031  4.19788  4.25200  2.34653  3.40521  1.99594  2.61011  4.26765  4.26084  3.03431  3.91726  3.30265  3.18554  2.48763  4.96457  2.70901    622 - -
          2.68618  4.42225  2.77519  2.73123  3.46354  2.40513  3.72494  3.29354  2.67741  2.69355  4.24690  2.90346  2.73739  3.18146  2.89801  2.37887  2.77519  2.98518  4.58477  3.61503
          0.00749  5.29394  6.01628  0.61958  0.77255  0.53270  0.88435
    295   2.29279  5.50265  1.95880  2.28517  4.41337  3.38162  3.35689  3.76605  2.60268  3.26251  3.83773  2.83921  3.65602  2.57038  2.85916  2.64611  2.63041  3.33206  5.22452  4.42751    623 - -
          2.68618  4.42225  2.77519  2.73123  3.46354  2.40513  3.72494  3.29354  2.67741  2.69355  4.24690  2.90346  2.73739  3.18146  2.89801  2.37887  2.77519  2.98518  4.58477  3.61503
          0.10378  5.29394  2.36917  0.61958  0.77255  0.53270  0.88435
    296   2.80840  4.20874  3.30226  2.78257  3.87751  3.45239  3.62952  2.97519  3.09375  2.70702  2.03142  3.67597  2.77808  3.39237  3.43351  2.77431  2.83458  2.19952  3.16643  3.67029    624 - -
          2.68618  4.42225  2.77519  2.73123  3.46354  2.40513  3.72494  3.29354  2.67741  2.69355  4.24690  2.90346  2.73739  3.18146  2.89801  2.37887  2.77519  2.98518  4.58477  3.61503
          0.00824  5.19840  5.92074  0.61958  0.77255  0.72503  0.66225
    297   2.49167  5.47893  2.55144  2.27101  4.41477  2.88497  3.21813  4.30841  2.22950  2.80250  3.87285  2.45930  3.98497  2.76393  2.74117  2.40918  2.77623  3.73743  5.91216  4.50176    625 - -
          2.68618  4.42225  2.77519  2.73123  3.46354  2.40513  3.72494  3.29354  2.67741  2.69355  4.24690  2.90346  2.73739  3.18146  2.89801  2.37887  2.77519  2.98518  4.58477  3.61503
          0.15535  5.21550  1.97722  0.61958  0.77255  0.71885  0.66809
    298   2.47545  5.40716  2.59482  2.23248  4.14606  3.53952  3.46623  4.22860  2.21297  3.25938  4.44931  3.08818  3.49179  2.60238  1.86821  2.78621  2.90433  3.40839  4.50600  4.25260    626 - -
          2.68610  4.42242  2.77508  2.73140  3.46371  2.40517  3.72505  3.29319  2.67747  2.69361  4.24707  2.90361  2.73670  3.18163  2.89810  2.37893  2.77513  2.98527  4.58494  3.61520
          0.43671  1.44853  2.12928  0.53165  0.88585  1.05897  0.42589
    299   2.61323  4.14536  2.93045  2.93752  3.82885  3.81773  4.05897  2.05993  2.94153  2.86056  3.64255  3.13014  2.47941  3.26819  3.16806  2.99886  3.04164  1.93877  5.24813  3.67131    634 - -
          2.68618  4.42225  2.77519  2.73123  3.46354  2.40513  3.72494  3.29354  2.67741  2.69355  4.24690  2.90346  2.73739  3.18146  2.89801  2.37887  2.77519  2.98518  4.58477  3.61503
          0.06670  4.95771  2.85609  0.61958  0.77255  1.24110  0.34118
    300   2.59804  5.17783  2.03457  2.45196  3.90974  3.64105  3.83648  3.65872  2.60317  3.03521  3.20157  2.84031  3.69203  2.63263  2.95132  2.48218  2.46537  2.93125  5.65119  4.28291    635 - -
          2.68618  4.42225  2.77519  2.73123  3.46354  2.40513  3.72494  3.29354  2.67741  2.69355  4.24690  2.90346  2.73739  3.18146  2.89801  2.37887  2.77519  2.98518  4.58477  3.61503
          0.01110  4.90212  5.62446  0.61958  0.77255  1.30752  0.31538
    301   2.32455  4.63027  3.49642  2.17838  2.35044  3.80294  3.59957  2.89350  2.84503  2.43302  3.65939  3.49981  4.18412  2.99546  3.40965  3.03989  2.62895  2.33838  4.91903  3.70512    636 - -
          2.68618  4.42225  2.77519  2.73123  3.46354  2.40513  3.72494  3.29354  2.67741  2.69355  4.24690  2.90346  2.73739  3.18146  2.89801  2.37887  2.77519  2.98518  4.58477  3.61503
          0.01110  4.90212  5.62446  0.61958  0.77255  1.30752  0.31538
    302   2.45822  5.28053  2.68204  2.25005  4.59853  3.56314  3.43628  3.99457  2.30240  2.99179  4.01480  3.01660  4.01409  2.72739  2.54409  2.68255  2.23565  2.63154  5.72975  4.08992    637 - -
          2.68618  4.42225  2.77519  2.73123  3.46354  2.40513  3.72494  3.29354  2.67741  2.69355  4.24690  2.90346  2.73739  3.18146  2.89801  2.37887  2.77519  2.98518  4.58477  3.61503
          0.01110  4.90212  5.62446  0.61958  0.77255  0.79625  0.59969
    303   2.23450  4.55239  3.96138  3.28249  3.67578  3.66848  4.20908  2.65075  3.21956  2.42320  3.38416  3.74710  2.50930  3.15970  3.41292  2.66143  2.98670  1.65243  5.14578  3.53982    638 - -
          2.68618  4.42225  2.77519  2.73123  3.46354  2.40513  3.72494  3.29354  2.67741  2.69355  4.24690  2.90346  2.73739  3.18146  2.89801  2.37887  2.77519  2.98518  4.58477  3.61503
          0.00956  5.05105  5.77339  0.61958  0.77255  1.10843  0.40059
    304   2.43132  5.08211  3.00702  2.33323  4.74103  3.36707  3.65509  4.17018  1.79818  3.62450  4.10425  2.97812  3.26334  2.39104  2.33881  2.70326  2.81125  3.05719  5.83417  4.42535    639 - -
          2.68618  4.42225  2.77519  2.73123  3.46354  2.40513  3.72494  3.29354  2.67741  2.69355  4.24690  2.90346  2.73739  3.18146  2.89801  2.37887  2.77519  2.98518  4.58477  3.61503
          0.00956  5.05105  5.77339  0.61958  0.77255  0.24502  1.52644
    305   2.78748  5.32273  3.31672  2.25031  3.59677  3.08170  3.73073  3.51016  2.32409  2.09485  4.29332  3.33349  3.95721  2.55847  2.19232  2.93007  3.06450  2.65945  5.80374  4.32858    640 - -
          2.68618  4.42225  2.77519  2.73123  3.46354  2.40513  3.72494  3.29354  2.67741  2.69355  4.24690  2.90346  2.73739  3.18146  2.89801  2.37887  2.77519  2.98518  4.58477  3.61503
          0.06924  5.30126  2.78207  0.61958  0.77255  0.47342  0.97516
    306   3.64403  6.22601  2.46745  2.80752  5.54331  0.66393  4.23685  5.06342  3.44408  4.53876  5.36520  2.29726  4.57572  3.53293  3.48511  3.41699  3.92491  4.62062  6.69005  5.19171    641 - -
          2.68618  4.42225  2.77519  2.73123  3.46354  2.40513  3.72494  3.29354  2.67741  2.69355  4.24690  2.90346  2.73739  3.18146  2.89801  2.37887  2.77519  2.98518  4.58477  3.61503
          0.00786  5.24556  5.96791  0.61958  0.77255  0.42803  1.05496
    307   2.50168  5.52078  2.20983  2.02285  4.86633  3.64292  3.90123  4.35266  2.30649  3.82626  4.43774  3.09143  4.17592  2.33719  2.83362  2.18424  2.28411  3.57599  5.95315  4.54188    642 - -
          2.68618  4.42225  2.77519  2.73123  3.46354  2.40513  3.72494  3.29354  2.67741  2.69355  4.24690  2.90346  2.73739  3.18146  2.89801  2.37887  2.77519  2.98518  4.58477  3.61503
          0.00748  5.29544  6.01778  0.61958  0.77255  0.46065  0.99661
    308   2.79145  4.55029  3.68125  3.39924  3.60646  3.98797  3.82919  2.91528  3.31249  2.32881  3.51562  3.75836  3.89509  3.74467  2.29758  2.75080  1.98756  1.88238  4.05171  3.07886    643 - -
          2.68618  4.42225  2.77519  2.73123  3.46354  2.40513  3.72494  3.29354  2.67741  2.69355  4.24690  2.90346  2.73739  3.18146  2.89801  2.37887  2.77519  2.98518  4.58477  3.61503
          0.00739  5.30656  6.02891  0.61958  0.77255  0.48576  0.95510
    309   2.82495  4.98401  3.63134  1.19097  4.16136  3.93406  3.87807  3.08612  3.00202  3.08822  3.99162  3.54834  3.84455  3.24147  3.47090  3.12712  3.23020  2.06074  5.53225  2.93556    644 - -
          2.68618  4.42225  2.77519  2.73123  3.46354  2.40513  3.72494  3.29354  2.67741  2.69355  4.24690  2.90346  2.73739  3.18146  2.89801  2.37887  2.77519  2.98518  4.58477  3.61503
          0.00739  5.30656  6.02891  0.61958  0.77255  0.48576  0.95510
    310   2.96932  5.40414  2.96382  1.91072  4.70077  3.81270  3.93231  2.22903  2.13999  3.29719  4.37090  3.30204  4.20484  2.95084  2.20269  2.93754  2.90873  2.55498  5.86688  4.11779    645 - -
          2.68618  4.42225  2.77519  2.73123  3.46354  2.40513  3.72494  3.29354  2.67741  2.69355  4.24690  2.90346  2.73739  3.18146  2.89801  2.37887  2.77519  2.98518  4.58477  3.61503
          0.00739  5.30656  6.02891  0.61958  0.77255  0.48576  0.95510
    311   3.19682  4.56385  5.15068  4.53821  2.74297  4.24793  4.69871  2.33001  4.32830  1.99896  2.89823  4.53256  4.72219  4.44620  4.33548  3.68795  3.35738  2.28704  1.14843  3.89616    646 - -
          2.68618  4.42225  2.77519  2.73123  3.46354  2.40513  3.72494  3.29354  2.67741  2.69355  4.24690  2.90346  2.73739  3.18146  2.89801  2.37887  2.77519  2.98518  4.58477  3.61503
          0.00739  5.30656  6.02891  0.61958  0.77255  0.48576  0.95510
    312   2.88542  5.50316  2.62063  1.81861  4.83898  3.79193  3.54149  3.23312  2.53324  3.75057  3.93368  3.03845  4.18518  3.00200  2.42156  2.45753  1.99338  3.05943  5.94142  4.53612    647 - -
          2.68618  4.42225  2.77519  2.73123  3.46354  2.40513  3.72494  3.29354  2.67741  2.69355  4.24690  2.90346  2.73739  3.18146  2.89801  2.37887  2.77519  2.98518  4.58477  3.61503
          0.00739  5.30656  6.02891  0.61958  0.77255  0.48576  0.95510
    313   3.51722  4.84985  5.49822  4.89128  2.23720  4.73837  5.06928  1.30973  4.69143  1.43647  2.75645  4.90565  5.03509  4.76318  4.68190  4.06465  3.74408  1.94727  5.45096  3.53198    648 - -
          2.68618  4.42225  2.77519  2.73123  3.46354  2.40513  3.72494  3.29354  2.67741  2.69355  4.24690  2.90346  2.73739  3.18146  2.89801  2.37887  2.77519  2.98518  4.58477  3.61503
          0.00739  5.30656  6.02891  0.61958  0.77255  0.48576  0.95510
    314   2.70482  4.89788  3.09464  2.30595  4.37308  3.76727  3.71152  2.73912  2.49191  3.53387  4.22564  3.17747  4.22064  3.00703  2.48893  2.33683  2.36383  2.10630  5.80864  3.68300    649 - -
          2.68618  4.42225  2.77519  2.73123  3.46354  2.40513  3.72494  3.29354  2.67741  2.69355  4.24690  2.90346  2.73739  3.18146  2.89801  2.37887  2.77519  2.98518  4.58477  3.61503
          0.01538  5.30656  4.57483  0.61958  0.77255  0.48576  0.95510
    315   3.28864  5.60994  3.28606  3.16663  5.51842  2.54157  4.74773  5.01282  3.72209  4.56203  5.36793  0.54824  4.60793  3.92507  4.23035  2.93782  3.00824  4.45964  6.73190  5.34375    650 - -
          2.68618  4.42225  2.77519  2.73123  3.46354  2.40513  3.72494  3.29354  2.67741  2.69355  4.24690  2.90346  2.73739  3.18146  2.89801  2.37887  2.77519  2.98518  4.58477  3.61503
          0.03838  5.29863  3.42169  0.61958  0.77255  0.46756  0.98492
    316   2.73694  5.50574  2.63685  2.14559  4.76776  3.03568  3.65858  4.33375  2.33290  3.11489  3.58743  2.95140  3.39237  2.58994  2.31419  2.70480  2.44224  3.16106  5.93949  3.93956    651 - -
          2.68631  4.42248  2.77504  2.73135  3.46377  2.40473  3.72483  3.29355  2.67745  2.69366  4.24622  2.90336  2.73752  3.18167  2.89813  2.37863  2.77528  2.98539  4.58500  3.61526
          0.31961  1.34801  4.28240  0.52992  0.88832  0.59453  0.80256
    317   2.68016  5.47816  2.44583  2.62182  4.70938  2.74099  3.50354  4.28999  2.58943  3.67007  3.97235  2.95401  3.58034  3.02253  3.16832  1.90792  1.75484  3.66726  5.91770  4.51365    658 - -
          2.68618  4.42225  2.77519  2.73123  3.46354  2.40513  3.72494  3.29354  2.67741  2.69355  4.24690  2.90346  2.73739  3.18146  2.89801  2.37887  2.77519  2.98518  4.58477  3.61503
          0.03036  5.26472  3.69950  0.61958  0.77255  0.40431  1.10093
    318   2.67147  5.47345  2.49477  2.54893  4.67284  2.45656  3.32851  4.11276  2.62546  3.63733  2.16290  2.99417  2.92661  2.79306  2.87850  2.62548  3.04649  3.06810  5.91659  4.21831    659 - -
          2.68618  4.42225  2.77519  2.73123  3.46354  2.40513  3.72494  3.29354  2.67741  2.69355  4.24690  2.90346  2.73739  3.18146  2.89801  2.37887  2.77519  2.98518  4.58477  3.61503
          0.00756  5.28501  6.00736  0.61958  0.77255  0.43963  1.03360
    319   2.92455  4.73653  2.57484  2.98907  3.01771  3.70014  3.61506  3.09390  3.36301  2.88622  1.37007  3.74651  4.06812  3.53637  3.60331  3.21864  3.17640  2.75479  3.32910  3.16043    660 - -
          2.68618  4.42225  2.77519  2.73123  3.46354  2.40513  3.72494  3.29354  2.67741  2.69355  4.24690  2.90346  2.73739  3.18146  2.89801  2.37887  2.77519  2.98518  4.58477  3.61503
          0.02738  5.30656  3.81457  0.61958  0.77255  0.48576  0.95510
    320   2.24190  5.31837  2.17110  2.67572  3.69532  3.50411  3.40469  3.49736  2.75023  2.54902  4.37960  3.12614  2.96591  2.63559  3.08313  2.51215  2.95841  3.13753  3.80714  3.84274    661 - -
          2.68618  4.42225  2.77519  2.73123  3.46354  2.40513  3.72494  3.29354  2.67741  2.69355  4.24690  2.90346  2.73739  3.18146  2.89801  2.37887  2.77519  2.98518  4.58477  3.61503
          0.00754  5.28673  6.00907  0.61958  0.77255  0.44293  1.02765
    321   5.55978  6.76525  5.57699  5.57045  5.36377  5.34643  0.05883  6.56577  5.50074  5.76913  7.02762  5.87663  5.98828  6.00550  5.58105  5.69915  5.96072  6.24829  6.66031  5.31830    662 - -
          2.68618  4.42225  2.77519  2.73123  3.46354  2.40513  3.72494  3.29354  2.67741  2.69355  4.24690  2.90346  2.73739  3.18146  2.89801  2.37887  2.77519  2.98518  4.58477  3.61503
          0.00739  5.30656  6.02891  0.61958  0.77255  0.48576  0.95510
    322   2.80589  5.13712  4.43029  4.32570  5.66550  3.69355  5.47123  5.13374  4.55390  4.79960  5.58542  3.15618  0.36005  4.77051  4.81424  3.30118  3.39803  4.09958  6.97941  5.81899    663 - -
          2.68618  4.42225  2.77519  2.73123  3.46354  2.40513  3.72494  3.29354  2.67741  2.69355  4.24690  2.90346  2.73739  3.18146  2.89801  2.37887  2.77519  2.98518  4.58477  3.61503
          0.00739  5.30656  6.02891  0.61958  0.77255  0.48576  0.95510
    323   3.58086  4.91204  5.54500  4.93724  1.36524  4.79355  5.09488  1.77080  4.73756  2.11457  1.55512  4.95557  5.07672  4.78986  4.72136  4.12012  3.80476  2.57667  4.22029  4.30920    664 - -
          2.68618  4.42225  2.77519  2.73123  3.46354  2.40513  3.72494  3.29354  2.67741  2.69355  4.24690  2.90346  2.73739  3.18146  2.89801  2.37887  2.77519  2.98518  4.58477  3.61503
          0.00739  5.30656  6.02891  0.61958  0.77255  0.48576  0.95510
    324   5.55978  6.76525  5.57699  5.57045  5.36377  5.34643  0.05883  6.56577  5.50074  5.76913  7.02762  5.87663  5.98828  6.00550  5.58105  5.69915  5.96072  6.24829  6.66031  5.31830    665 - -
          2.68618  4.42225  2.77519  2.73123  3.46354  2.40513  3.72494  3.29354  2.67741  2.69355  4.24690  2.90346  2.73739  3.18146  2.89801  2.37887  2.77519  2.98518  4.58477  3.61503
          0.00739  5.30656  6.02891  0.61958  0.77255  0.48576  0.95510
    325   3.01347  4.47823  5.01542  4.40370  3.19115  4.26491  4.11500  1.64496  4.19929  1.09285  3.41104  4.41185  4.44888  3.66456  4.22351  3.57485  3.24781  2.16856  5.09844  3.84209    666 - -
          2.68618  4.42225  2.77519  2.73123  3.46354  2.40513  3.72494  3.29354  2.67741  2.69355  4.24690  2.90346  2.73739  3.18146  2.89801  2.37887  2.77519  2.98518  4.58477  3.61503
          0.00739  5.30656  6.02891  0.61958  0.77255  0.48576  0.95510
    326   5.55978  6.76525  5.57699  5.57045  5.36377  5.34643  0.05883  6.56577  5.50074  5.76913  7.02762  5.87663  5.98828  6.00550  5.58105  5.69915  5.96072  6.24829  6.66031  5.31830    667 - -
          2.68618  4.42225  2.77519  2.73123  3.46354  2.40513  3.72494  3.29354  2.67741  2.69355  4.24690  2.90346  2.73739  3.18146  2.89801  2.37887  2.77519  2.98518  4.58477  3.61503
          0.00739  5.30656  6.02891  0.61958  0.77255  0.48576  0.95510
    327   3.00226  4.87157  3.34223  3.20195  3.74955  1.23510  3.97179  3.19929  3.17069  2.19630  3.96877  3.42027  4.36131  3.19296  3.35015  3.14604  2.95562  2.47324  5.43826  4.18301    668 - -
          2.68618  4.42225  2.77519  2.73123  3.46354  2.40513  3.72494  3.29354  2.67741  2.69355  4.24690  2.90346  2.73739  3.18146  2.89801  2.37887  2.77519  2.98518  4.58477  3.61503
          0.00739  5.30656  6.02891  0.61958  0.77255  0.48576  0.95510
    328   2.64078  4.12139  4.22353  3.60216  3.52518  3.89820  1.87821  2.92996  3.64540  2.63779  3.08240  2.55529  4.49652  3.72690  3.89194  3.37363  2.13376  1.96434  4.33159  3.44978    669 - -
          2.68618  4.42225  2.77519  2.73123  3.46354  2.40513  3.72494  3.29354  2.67741  2.69355  4.24690  2.90346  2.73739  3.18146  2.89801  2.37887  2.77519  2.98518  4.58477  3.61503
          0.00739  5.30656  6.02891  0.61958  0.77255  0.48576  0.95510
    329   2.79592  5.50763  2.75200  2.51421  3.19687  3.70617  2.48818  4.09576  2.66214  3.74983  4.55022  3.20607  2.91745  1.96839  2.61087  2.49850  2.44284  3.47588  5.94473  4.53825    670 - -
          2.68618  4.42225  2.77519  2.73123  3.46354  2.40513  3.72494  3.29354  2.67741  2.69355  4.24690  2.90346  2.73739  3.18146  2.89801  2.37887  2.77519  2.98518  4.58477  3.61503
          0.00739  5.30656  6.02891  0.61958  0.77255  0.48576  0.95510
    330   2.82839  3.77737  4.96476  4.36541  0.74833  3.75369  4.57176  2.94411  4.17404  2.68529  3.22402  4.39391  4.63844  4.32287  4.22190  3.57927  3.35821  2.67000  4.57058  3.76776    671 - -
          2.68618  4.42225  2.77519  2.73123  3.46354  2.40513  3.72494  3.29354  2.67741  2.69355  4.24690  2.90346  2.73739  3.18146  2.89801  2.37887  2.77519  2.98518  4.58477  3.61503
          0.00739  5.30656  6.02891  0.61958  0.77255  0.48576  0.95510
    331   2.75394  5.35713  3.28770  2.41174  4.80036  3.74086  3.85390  4.27135  2.17153  2.96826  3.90095  3.19913  4.19227  1.50601  2.08362  2.94090  3.02674  3.73029  5.30475  3.94025    672 - -
          2.68618  4.42225  2.77519  2.73123  3.46354  2.40513  3.72494  3.29354  2.67741  2.69355  4.24690  2.90346  2.73739  3.18146  2.89801  2.37887  2.77519  2.98518  4.58477  3.61503
          0.00739  5.30656  6.02891  0.61958  0.77255  0.48576  0.95510
    332   3.23622  4.61210  5.18895  4.08595  3.72413  4.46526  4.82004  1.58415  4.39658  2.20555  3.21342  4.61134  4.64325  4.28755  4.43105  3.78362  3.48988  0.93187  5.31235  3.93116    673 - -
          2.68618  4.42225  2.77519  2.73123  3.46354  2.40513  3.72494  3.29354  2.67741  2.69355  4.24690  2.90346  2.73739  3.18146  2.89801  2.37887  2.77519  2.98518  4.58477  3.61503
          0.00739  5.30656  6.02891  0.61958  0.77255  0.48576  0.95510
    333   2.55775  4.46548  4.93901  4.23223  3.56031  3.67261  4.56359  1.95254  4.13764  1.16121  3.28149  4.36335  3.99603  4.28811  3.95306  3.50370  2.81335  1.99388  5.08807  3.90965    674 - -
          2.68618  4.42225  2.77519  2.73123  3.46354  2.40513  3.72494  3.29354  2.67741  2.69355  4.24690  2.90346  2.73739  3.18146  2.89801  2.37887  2.77519  2.98518  4.58477  3.61503
          0.02018  5.30656  4.19840  0.61958  0.77255  0.48576  0.95510
    334   2.47584  3.79071  2.47144  2.28863  4.85758  2.84290  3.90167  4.34211  2.35779  3.81898  4.55585  3.15794  4.17652  2.93561  2.67649  1.53005  2.96843  3.90412  5.94850  4.53876    675 - -
          2.68618  4.42225  2.77519  2.73123  3.46354  2.40513  3.72494  3.29354  2.67741  2.69355  4.24690  2.90346  2.73739  3.18146  2.89801  2.37887  2.77519  2.98518  4.58477  3.61503
          0.02025  5.29387  4.19779  0.61958  0.77255  0.51838  0.90507
    335   2.67842  5.26107  3.28438  2.25326  4.09996  3.71078  3.54969  2.59253  2.53688  3.22423  3.96898  3.31894  3.65978  3.17191  1.68009  2.48004  3.14660  2.77920  5.51336  4.00841    676 - -
          2.68618  4.42225  2.77519  2.73123  3.46354  2.40513  3.72494  3.29354  2.67741  2.69355  4.24690  2.90346  2.73739  3.18146  2.89801  2.37887  2.77519  2.98518  4.58477  3.61503
          0.07675  5.28361  2.67642  0.61958  0.77255  0.56911  0.83478
    336   2.77570  5.50223  2.21763  2.51707  4.84556  2.65038  3.89738  4.33199  2.63095  3.80675  4.54418  1.52537  4.15170  2.48543  2.94424  2.59792  3.03905  3.89210  5.93511  4.36566    677 - -
          2.68618  4.42225  2.77519  2.73123  3.46354  2.40513  3.72494  3.29354  2.67741  2.69355  4.24690  2.90346  2.73739  3.18146  2.89801  2.37887  2.77519  2.98518  4.58477  3.61503
          0.01325  5.21497  4.86324  0.61958  0.77255  0.73995  0.64843
    337   2.62939  5.35294  2.81545  2.72450  4.52533  1.24486  3.96531  3.89805  2.67715  3.30265  4.19953  3.16836  3.23536  3.01252  2.91271  2.69484  3.04614  3.71648  5.81867  4.44115    678 - -
          2.68581  4.42255  2.77359  2.73194  3.46398  2.40517  3.72682  3.29320  2.67770  2.69361  4.24748  2.90364  2.73513  3.18185  2.89904  2.38003  2.77489  2.98558  4.58260  3.61392
          0.89002  0.55714  4.10393  1.91730  0.15900  0.74336  0.64534
    338   2.65005  5.43428  2.98697  2.36849  4.15545  3.67134  3.72209  4.04816  2.30000  3.29444  4.40541  3.09993  1.81248  2.71245  2.54416  2.88067  2.69449  2.85485  5.87795  4.47820    720 - -
          2.68618  4.42225  2.77519  2.73123  3.46354  2.40513  3.72494  3.29354  2.67741  2.69355  4.24690  2.90346  2.73739  3.18146  2.89801  2.37887  2.77519  2.98518  4.58477  3.61503
          0.15101  5.20731  2.00485  0.61958  0.77255  0.45206  1.01147
    339   2.01403  5.43259  2.65680  2.33188  4.43380  3.00495  3.71512  4.25159  2.33444  3.42007  4.30241  3.10779  2.28871  2.93167  2.71770  2.68246  2.78748  3.81942  5.86953  3.45423    721 - -
          2.68618  4.42225  2.77519  2.73123  3.46354  2.40513  3.72494  3.29354  2.67741  2.69355  4.24690  2.90346  2.73739  3.18146  2.89801  2.37887  2.77519  2.98518  4.58477  3.61503
          0.01970  5.14592  4.29186  0.61958  0.77255  0.86138  0.54919
    340   2.02208  5.07892  3.07383  2.37179  3.71055  2.73711  4.00751  2.92332  2.73380  2.87435  4.15545  3.28301  2.44973  3.17476  3.14525  2.83207  2.83232  2.53178  5.59560  4.27692    722 - -
          2.68618  4.42225  2.77519  2.73123  3.46354  2.40513  3.72494  3.29354  2.67741  2.69355  4.24690  2.90346  2.73739  3.18146  2.89801  2.37887  2.77519  2.98518  4.58477  3.61503
          0.02592  5.14965  3.92271  0.61958  0.77255  0.69107  0.69523
    341   2.62987  5.42110  2.89177  2.32861  4.36653  3.41534  2.64188  3.67044  2.58709  3.37347  4.12261  2.41480  2.66248  2.81060  3.06784  2.49016  2.45759  3.57443  4.99185  3.39911    723 - -
          2.68618  4.42225  2.77519  2.73123  3.46354  2.40513  3.72494  3.29354  2.67741  2.69355  4.24690  2.90346  2.73739  3.18146  2.89801  2.37887  2.77519  2.98518  4.58477  3.61503
          0.09926  5.18240  2.42046  0.61958  0.77255  0.81906  0.58133
    342   2.72182  5.39396  2.74144  1.72360  3.94454  2.75593  3.67032  4.00955  2.62713  3.34563  4.10280  2.84139  2.89896  2.87612  2.47776  2.85502  3.02666  3.67462  5.49805  3.05684    724 - -
          2.68618  4.42225  2.77519  2.73123  3.46354  2.40513  3.72494  3.29354  2.67741  2.69355  4.24690  2.90346  2.73739  3.18146  2.89801  2.37887  2.77519  2.98518  4.58477  3.61503
          0.05842  5.09966  2.98284  0.61958  0.77255  0.37123  1.17082
    343   2.32947  5.45954  3.07114  2.65517  4.18431  2.48263  3.27678  4.17351  2.52441  3.31420  4.50318  3.10121  2.74011  2.65896  2.08988  2.32744  2.84077  3.60399  5.89905  4.33270    725 - -
          2.68618  4.42225  2.77519  2.73123  3.46354  2.40513  3.72494  3.29354  2.67741  2.69355  4.24690  2.90346  2.73739  3.18146  2.89801  2.37887  2.77519  2.98518  4.58477  3.61503
          0.04972  5.22616  3.14353  0.61958  0.77255  0.38814  1.13419
    344   1.83545  4.71626  3.84820  3.30876  3.27632  1.62305  3.90114  3.05432  3.32978  2.69625  3.82094  3.77231  2.75602  3.49230  3.61358  3.12006  3.04608  2.59522  4.78067  3.59797    726 - -
          2.68618  4.42225  2.77519  2.73123  3.46354  2.40513  3.72494  3.29354  2.67741  2.69355  4.24690  2.90346  2.73739  3.18146  2.89801  2.37887  2.77519  2.98518  4.58477  3.61503
          0.00775  5.25971  5.98205  0.61958  0.77255  0.64735  0.74114
    345   3.04106  4.47274  4.68924  4.09307  2.96693  4.17155  3.91381  2.52193  3.73068  2.17768  3.28721  3.96562  3.76616  4.04121  2.55218  3.46777  3.22799  2.43032  1.39171  3.57355    727 - -
          2.68618  4.42225  2.77519  2.73123  3.46354  2.40513  3.72494  3.29354  2.67741  2.69355  4.24690  2.90346  2.73739  3.18146  2.89801  2.37887  2.77519  2.98518  4.58477  3.61503
          0.00775  5.25971  5.98205  0.61958  0.77255  0.53072  0.88717
    346   2.59562  5.32950  3.34271  2.75572  4.06633  3.76767  4.01095  3.74355  1.16412  3.51712  4.29696  3.12637  4.20657  2.94226  2.31270  2.92969  2.88293  3.34341  4.40303  4.09409    728 - -
          2.68618  4.42225  2.77519  2.73123  3.46354  2.40513  3.72494  3.29354  2.67741  2.69355  4.24690  2.90346  2.73739  3.18146  2.89801  2.37887  2.77519  2.98518  4.58477  3.61503
          0.00759  5.28031  6.00265  0.61958  0.77255  0.47681  0.96958
    347   3.17189  5.55351  0.68388  2.92460  4.84542  3.94451  4.25360  3.87572  2.65816  3.30339  4.65986  3.46348  4.40968  3.39851  3.53188  3.26522  3.43838  3.51890  6.08068  4.70997    729 - -
          2.68618  4.42225  2.77519  2.73123  3.46354  2.40513  3.72494  3.29354  2.67741  2.69355  4.24690  2.90346  2.73739  3.18146  2.89801  2.37887  2.77519  2.98518  4.58477  3.61503
          0.00746  5.29814  6.02049  0.61958  0.77255  0.51738  0.90655
    348   2.98688  4.84898  2.84478  3.27312  4.01434  4.00114  4.26387  2.89287  3.23747  3.07459  3.84507  3.70469  4.39151  3.55344  3.27661  3.12504  1.01813  2.25416  5.44025  4.19204    730 - -
          2.68618  4.42225  2.77519  2.73123  3.46354  2.40513  3.72494  3.29354  2.67741  2.69355  4.24690  2.90346  2.73739  3.18146  2.89801  2.37887  2.77519  2.98518  4.58477  3.61503
          0.00746  5.29814  6.02049  0.61958  0.77255  0.51738  0.90655
    349   2.79466  4.47046  3.98179  4.33523  3.25652  4.24309  4.57336  2.07490  4.14388  2.32331  3.54034  4.37051  4.60684  4.29557  4.18995  3.39346  2.56084  1.03649  5.09862  3.19314    731 - -
          2.68618  4.42225  2.77519  2.73123  3.46354  2.40513  3.72494  3.29354  2.67741  2.69355  4.24690  2.90346  2.73739  3.18146  2.89801  2.37887  2.77519  2.98518  4.58477  3.61503
          0.00746  5.29814  6.02049  0.61958  0.77255  0.51738  0.90655
    350   2.90511  5.00591  3.31120  2.88497  3.75545  3.54523  3.56610  2.59779  2.85790  1.74105  3.28130  2.51165  3.59458  2.84306  2.79459  3.00048  2.88878  3.14346  4.51603  3.39605    732 - -
          2.68618  4.42225  2.77519  2.73123  3.46354  2.40513  3.72494  3.29354  2.67741  2.69355  4.24690  2.90346  2.73739  3.18146  2.89801  2.37887  2.77519  2.98518  4.58477  3.61503
          0.00746  5.29814  6.02049  0.61958  0.77255  0.51738  0.90655
    351   2.52377  4.49864  3.95394  4.03135  3.59921  4.20780  4.52602  2.45403  3.98996  1.76108  3.20485  3.33080  4.28208  4.17606  4.10253  3.50555  3.10603  1.13915  5.12026  3.93593    733 - -
          2.68618  4.42225  2.77519  2.73123  3.46354  2.40513  3.72494  3.29354  2.67741  2.69355  4.24690  2.90346  2.73739  3.18146  2.89801  2.37887  2.77519  2.98518  4.58477  3.61503
          0.06940  5.29814  2.77990  0.61958  0.77255  0.46649  0.98671
    352   2.73422  5.48431  2.57689  2.18556  4.82466  2.75637  3.60231  4.20955  2.54828  2.77286  4.13469  2.81757  2.37751  2.93619  2.31639  2.75714  3.03828  3.22690  5.91983  4.26008    734 - -
          2.68618  4.42225  2.77519  2.73123  3.46354  2.40513  3.72494  3.29354  2.67741  2.69355  4.24690  2.90346  2.73739  3.18146  2.89801  2.37887  2.77519  2.98518  4.58477  3.61503
          0.10644  5.24562  2.34649  0.61958  0.77255  0.39746  1.11482
    353   2.51079  5.43695  3.16873  2.50735  4.53945  3.25272  3.77073  4.04102  2.16417  3.38815  4.48228  3.12457  1.55664  2.77029  2.76738  2.71625  3.06374  3.38773  5.88024  4.48022    735 - -
          2.68640  4.42282  2.77540  2.73179  3.46365  2.40406  3.72450  3.29399  2.67760  2.69390  4.24564  2.90344  2.73643  3.18191  2.89825  2.37921  2.77528  2.98547  4.58337  3.61467
          0.55871  0.85473  5.93217  0.97089  0.47602  0.37898  1.15379
    354   2.75545  5.51552  2.86084  1.94498  4.85890  1.61583  3.89775  4.34367  2.53611  3.69775  4.30563  2.82792  4.17669  2.56583  2.79759  2.65652  3.00131  3.90525  4.86383  4.20559    747 - -
          2.68618  4.42225  2.77519  2.73123  3.46354  2.40513  3.72494  3.29354  2.67741  2.69355  4.24690  2.90346  2.73739  3.18146  2.89801  2.37887  2.77519  2.98518  4.58477  3.61503
          0.41637  5.29551  1.09198  0.61958  0.77255  0.46081  0.99634
    355   2.56855  5.30012  2.75935  1.58533  4.62509  2.44157  3.65595  3.64521  2.47557  3.43143  4.34611  3.05568  4.01303  2.74161  2.91381  2.58136  2.91212  3.46505  4.58419  4.10208    748 - -
          2.68618  4.42225  2.77519  2.73123  3.46354  2.40513  3.72494  3.29354  2.67741  2.69355  4.24690  2.90346  2.73739  3.18146  2.89801  2.37887  2.77519  2.98518  4.58477  3.61503
          0.01105  4.90689  5.62924  0.61958  0.77255  0.18643  1.77146
    356   2.78871  5.39583  3.32361  2.26029  4.68947  3.74169  3.87377  3.08660  2.40836  3.67889  4.34655  3.23676  3.52493  2.89001  2.27376  2.36230  1.90922  2.57103  4.96144  4.34199    749 - -
          2.68618  4.42225  2.77519  2.73123  3.46354  2.40513  3.72494  3.29354  2.67741  2.69355  4.24690  2.90346  2.73739  3.18146  2.89801  2.37887  2.77519  2.98518  4.58477  3.61503
          0.00739  5.30656  6.02891  0.61958  0.77255  0.48576  0.95510
    357   2.34681  4.10605  4.94419  3.94061  3.39828  4.22981  4.43490  2.43318  4.13939  2.20486  3.17203  4.36221  4.59441  4.28752  3.78643  2.38039  2.92607  1.27471  4.64330  2.97507    750 - -
          2.68618  4.42225  2.77519  2.73123  3.46354  2.40513  3.72494  3.29354  2.67741  2.69355  4.24690  2.90346  2.73739  3.18146  2.89801  2.37887  2.77519  2.98518  4.58477  3.61503
          0.00739  5.30656  6.02891  0.61958  0.77255  0.48576  0.95510
    358   2.89548  5.52094  2.72057  1.75906  4.86416  3.78943  3.68887  3.77916  2.34728  3.74098  4.56214  3.22345  4.18288  2.80279  1.71789  2.86203  2.33000  3.44536  5.95459  4.54505    751 - -
          2.68618  4.42225  2.77519  2.73123  3.46354  2.40513  3.72494  3.29354  2.67741  2.69355  4.24690  2.90346  2.73739  3.18146  2.89801  2.37887  2.77519  2.98518  4.58477  3.61503
          0.00739  5.30656  6.02891  0.61958  0.77255  0.48576  0.95510
    359   2.78723  4.60150  5.22847  4.62377  2.94721  4.45624  4.80744  1.31915  4.41966  1.87724  3.04138  4.61960  4.80274  4.54879  4.43230  3.77542  3.36618  1.44994  5.27913  3.76824    752 - -
          2.68618  4.42225  2.77519  2.73123  3.46354  2.40513  3.72494  3.29354  2.67741  2.69355  4.24690  2.90346  2.73739  3.18146  2.89801  2.37887  2.77519  2.98518  4.58477  3.61503
          0.00739  5.30656  6.02891  0.61958  0.77255  0.48576  0.95510
    360   1.78503  4.97551  2.65928  2.95956  4.15129  3.48031  4.16148  2.74004  2.87703  1.90310  4.06562  3.55334  4.32093  3.19491  2.34687  3.12089  3.26700  2.82611  4.64742  3.70553    753 - -
          2.68618  4.42225  2.77519  2.73123  3.46354  2.40513  3.72494  3.29354  2.67741  2.69355  4.24690  2.90346  2.73739  3.18146  2.89801  2.37887  2.77519  2.98518  4.58477  3.61503
          0.00739  5.30656  6.02891  0.61958  0.77255  0.48576  0.95510
    361   2.60032  4.46560  5.05294  4.43884  1.74780  4.26463  4.59936  2.39741  4.22567  1.94649  2.73700  4.42573  4.62644  4.35706  4.23563  3.38527  2.99429  1.49493  4.89087  3.91651    754 - -
          2.68618  4.42225  2.77519  2.73123  3.46354  2.40513  3.72494  3.29354  2.67741  2.69355  4.24690  2.90346  2.73739  3.18146  2.89801  2.37887  2.77519  2.98518  4.58477  3.61503
          0.00739  5.30656  6.02891  0.61958  0.77255  0.48576  0.95510
    362   2.83466  5.51360  2.50339  2.42879  4.71251  3.78996  3.12075  3.92616  2.14237  3.74938  4.55552  3.22428  3.05571  2.79929  1.84757  2.88217  2.83046  2.48011  5.69257  4.34357    755 - -
          2.68618  4.42225  2.77519  2.73123  3.46354  2.40513  3.72494  3.29354  2.67741  2.69355  4.24690  2.90346  2.73739  3.18146  2.89801  2.37887  2.77519  2.98518  4.58477  3.61503
          0.02209  5.30656  4.08105  0.61958  0.77255  0.48576  0.95510
    363   1.53378  4.56595  3.74844  3.81148  1.43900  4.03165  4.42776  2.85775  3.71021  2.49453  3.63698  4.06630  4.28967  3.20568  3.92999  3.37259  3.12960  2.71027  4.77412  3.62696    756 - -
          2.68618  4.42225  2.77519  2.73123  3.46354  2.40513  3.72494  3.29354  2.67741  2.69355  4.24690  2.90346  2.73739  3.18146  2.89801  2.37887  2.77519  2.98518  4.58477  3.61503
          0.00750  5.29197  6.01432  0.61958  0.77255  0.45342  1.00910
    364   2.48769  5.52452  1.58656  2.39969  4.86938  2.87964  3.87800  4.35522  2.49867  3.64389  4.42962  2.66273  3.30892  2.98317  2.69115  2.63316  2.76697  3.60214  5.95732  4.54646    757 - -
          2.68618  4.42225  2.77519  2.73123  3.46354  2.40513  3.72494  3.29354  2.67741  2.69355  4.24690  2.90346  2.73739  3.18146  2.89801  2.37887  2.77519  2.98518  4.58477  3.61503
          0.01021  5.30656  5.26010  0.61958  0.77255  0.48576  0.95510
    365   2.93755  5.52054  2.12530  2.40868  4.31060  3.32762  2.74074  4.34943  2.65660  3.61008  4.29454  1.66044  3.03024  2.75706  3.04402  2.76050  3.16059  3.78966  5.95398  4.15348    758 - -
          2.68618  4.42225  2.77519  2.73123  3.46354  2.40513  3.72494  3.29354  2.67741  2.69355  4.24690  2.90346  2.73739  3.18146  2.89801  2.37887  2.77519  2.98518  4.58477  3.61503
          0.01700  5.30377  4.43223  0.61958  0.77255  0.47918  0.96572
    366   2.81097  5.12441  3.29427  2.72942  2.72392  3.87853  3.33955  3.38107  2.67291  3.14856  4.20307  3.42094  1.62966  2.76050  3.19232  3.06035  2.89608  3.17468  5.27570  2.70564    759 - -
          2.68563  4.41967  2.77476  2.73100  3.46356  2.40532  3.72522  3.29413  2.67753  2.69392  4.24782  2.90332  2.73659  3.18181  2.89849  2.37892  2.77537  2.98533  4.58569  3.61513
          0.60539  0.79472  6.01941  1.28364  0.32438  0.46415  0.99066
    367   2.93877  5.17485  3.41188  2.87004  4.09606  1.02396  3.17330  3.76849  2.89481  3.37567  4.25050  3.30809  3.40372  3.24360  2.97894  3.05934  3.15087  3.43955  5.12474  3.92458    779 - -
          2.68618  4.42225  2.77519  2.73123  3.46354  2.40513  3.72494  3.29354  2.67741  2.69355  4.24690  2.90346  2.73739  3.18146  2.89801  2.37887  2.77519  2.98518  4.58477  3.61503
          0.00739  5.30656  6.02891  0.61958  0.77255  0.48576  0.95510
    368   2.48432  5.49096  2.47378  2.37718  4.82167  3.79425  3.93183  3.32116  2.18794  2.93854  3.72396  2.97694  2.83913  2.73953  2.40896  2.92467  2.66414  2.89994  5.93233  4.20232    780 - -
          2.68618  4.42225  2.77519  2.73123  3.46354  2.40513  3.72494  3.29354  2.67741  2.69355  4.24690  2.90346  2.73739  3.18146  2.89801  2.37887  2.77519  2.98518  4.58477  3.61503
          0.00739  5.30656  6.02891  0.61958  0.77255  0.48576  0.95510
    369   3.11285  4.60780  4.69916  4.11609  2.25905  4.26566  4.48119  3.05719  3.70527  2.76222  3.72563  4.26613  4.63144  4.17032  3.39768  3.35220  2.42796  2.86654  1.59053  1.74379    781 - -
          2.68618  4.42225  2.77519  2.73123  3.46354  2.40513  3.72494  3.29354  2.67741  2.69355  4.24690  2.90346  2.73739  3.18146  2.89801  2.37887  2.77519  2.98518  4.58477  3.61503
          0.00739  5.30656  6.02891  0.61958  0.77255  0.48576  0.95510
    370   2.59314  4.57976  5.05778  4.45511  3.34705  4.37343  4.71096  2.82029  4.26928  2.17515  1.22679  4.50064  3.24571  4.41549  4.31780  3.68497  3.43200  1.58938  5.21956  4.04896    782 - -
          2.68618  4.42225  2.77519  2.73123  3.46354  2.40513  3.72494  3.29354  2.67741  2.69355  4.24690  2.90346  2.73739  3.18146  2.89801  2.37887  2.77519  2.98518  4.58477  3.61503
          0.00739  5.30656  6.02891  0.61958  0.77255  0.48576  0.95510
    371   2.34437  4.23039  4.02959  4.35058  1.71516  4.23197  4.37873  2.58215  4.15154  2.06949  3.16052  4.01496  4.59640  4.29659  4.18572  3.28149  3.11105  2.60133  2.73744  2.17274    783 - -
          2.68618  4.42225  2.77519  2.73123  3.46354  2.40513  3.72494  3.29354  2.67741  2.69355  4.24690  2.90346  2.73739  3.18146  2.89801  2.37887  2.77519  2.98518  4.58477  3.61503
          0.00739  5.30656  6.02891  0.61958  0.77255  0.48576  0.95510
    372   5.55978  6.76525  5.57699  5.57045  5.36377  5.34643  0.05883  6.56577  5.50074  5.76913  7.02762  5.87663  5.98828  6.00550  5.58105  5.69915  5.96072  6.24829  6.66031  5.31830    784 - -
          2.68618  4.42225  2.77519  2.73123  3.46354  2.40513  3.72494  3.29354  2.67741  2.69355  4.24690  2.90346  2.73739  3.18146  2.89801  2.37887  2.77519  2.98518  4.58477  3.61503
          0.00739  5.30656  6.02891  0.61958  0.77255  0.48576  0.95510
    373   5.01138  0.04884  6.33489  6.38380  6.48344  5.15804  6.84581  6.23796  6.38637  5.84900  7.04204  6.26366  5.89028  6.66453  6.23434  5.27786  5.55592  5.79507  7.30648  6.71428    785 - -
          2.68618  4.42225  2.77519  2.73123  3.46354  2.40513  3.72494  3.29354  2.67741  2.69355  4.24690  2.90346  2.73739  3.18146  2.89801  2.37887  2.77519  2.98518  4.58477  3.61503
          0.00739  5.30656  6.02891  0.61958  0.77255  0.48576  0.95510
    374   5.55978  6.76525  5.57699  5.57045  5.36377  5.34643  0.05883  6.56577  5.50074  5.76913  7.02762  5.87663  5.98828  6.00550  5.58105  5.69915  5.96072  6.24829  6.66031  5.31830    786 - -
          2.68618  4.42225  2.77519  2.73123  3.46354  2.40513  3.72494  3.29354  2.67741  2.69355  4.24690  2.90346  2.73739  3.18146  2.89801  2.37887  2.77519  2.98518  4.58477  3.61503
          0.00739  5.30656  6.02891  0.61958  0.77255  0.48576  0.95510
    375   2.87100  4.61876  3.36885  3.51474  3.44264  4.11257  3.52396  1.41188  3.60134  2.13743  2.93963  2.14507  4.48604  3.64473  3.86356  3.38153  3.28976  2.53189  5.22064  4.01477    787 - -
          2.68618  4.42225  2.77519  2.73123  3.46354  2.40513  3.72494  3.29354  2.67741  2.69355  4.24690  2.90346  2.73739  3.18146  2.89801  2.37887  2.77519  2.98518  4.58477  3.61503
          0.00739  5.30656  6.02891  0.61958  0.77255  0.48576  0.95510
    376   2.77473  4.46848  4.73534  4.31124  3.28122  4.23136  4.55897  2.19669  4.12216  0.90204  3.35277  3.96386  4.59596  3.74580  4.17305  3.29735  3.10526  2.33103  5.08969  3.91093    788 - -
          2.68618  4.42225  2.77519  2.73123  3.46354  2.40513  3.72494  3.29354  2.67741  2.69355  4.24690  2.90346  2.73739  3.18146  2.89801  2.37887  2.77519  2.98518  4.58477  3.61503
          0.00739  5.30656  6.02891  0.61958  0.77255  0.48576  0.95510
    377   2.91275  5.47840  2.21365  1.33015  4.53277  3.63722  3.24253  4.09109  2.72913  3.47236  4.46622  3.19783  3.55825  3.07155  3.19910  2.80584  3.22605  3.63492  5.65367  2.51900    789 - -
          2.68618  4.42225  2.77519  2.73123  3.46354  2.40513  3.72494  3.29354  2.67741  2.69355  4.24690  2.90346  2.73739  3.18146  2.89801  2.37887  2.77519  2.98518  4.58477  3.61503
          0.00739  5.30656  6.02891  0.61958  0.77255  0.48576  0.95510
    378   5.55978  6.76525  5.57699  5.57045  5.36377  5.34643  0.05883  6.56577  5.50074  5.76913  7.02762  5.87663  5.98828  6.00550  5.58105  5.69915  5.96072  6.24829  6.66031  5.31830    790 - -
          2.68618  4.42225  2.77519  2.73123  3.46354  2.40513  3.72494  3.29354  2.67741  2.69355  4.24690  2.90346  2.73739  3.18146  2.89801  2.37887  2.77519  2.98518  4.58477  3.61503
          0.00498  5.30415        *  0.61958  0.77255  0.00000        *
//
